# Supplementary material for: Construction of a quinoline ring via a 3-component reaction in water: crystal structure analysis and H-bonding patterns of a 2-aryl quinoline
Source: Royal Society of Chemistry journal article supplement (doi:10.1039/c2gc35256g), 2012-01-01
Supplement: c2gc35256g_2.pdf [file c2gc35256g_2.pdf]

CRR-DHP-01 in CDCl<sub>3</sub>  
NMR-400MHz

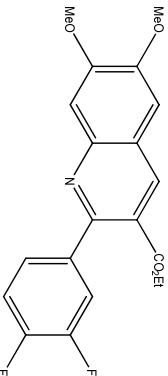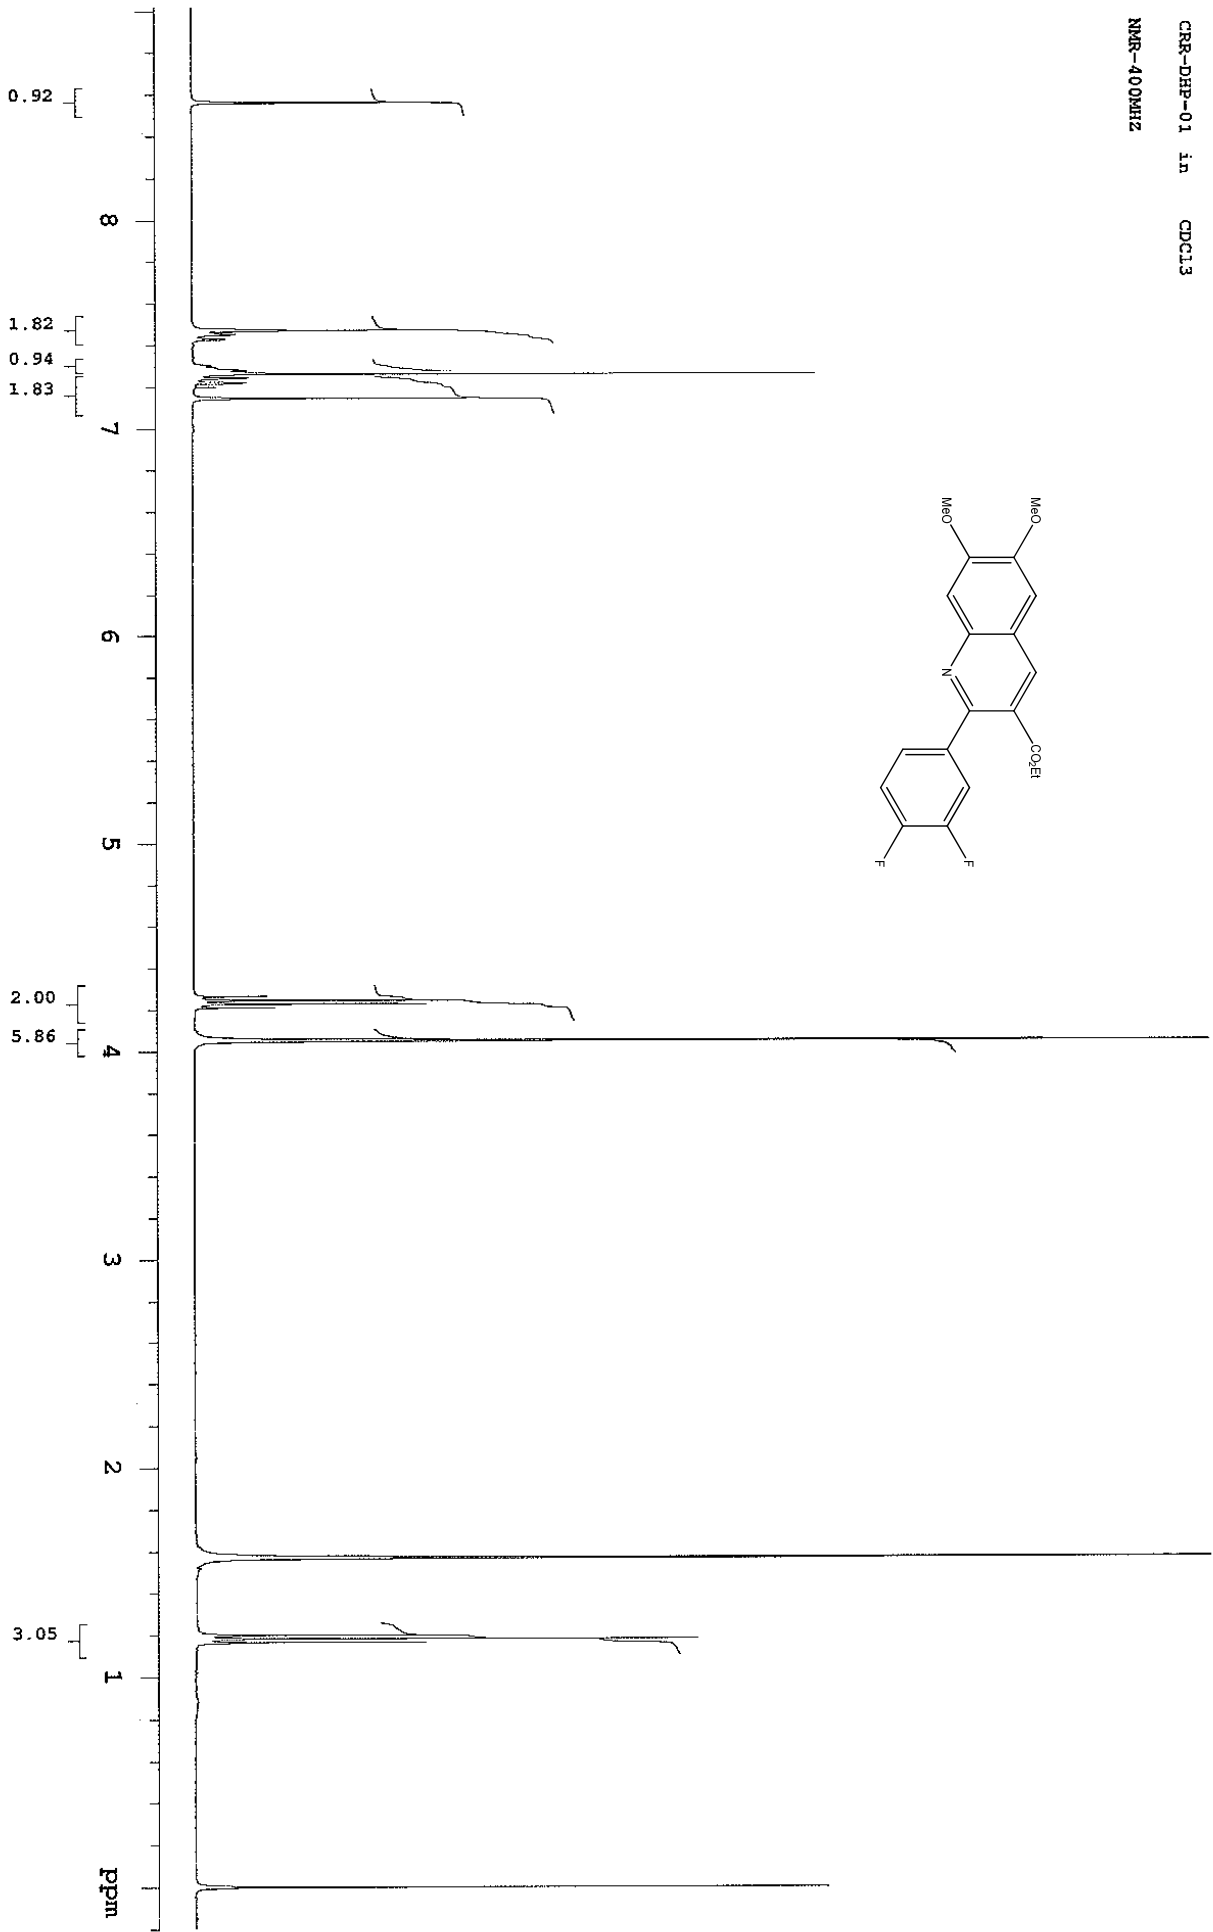

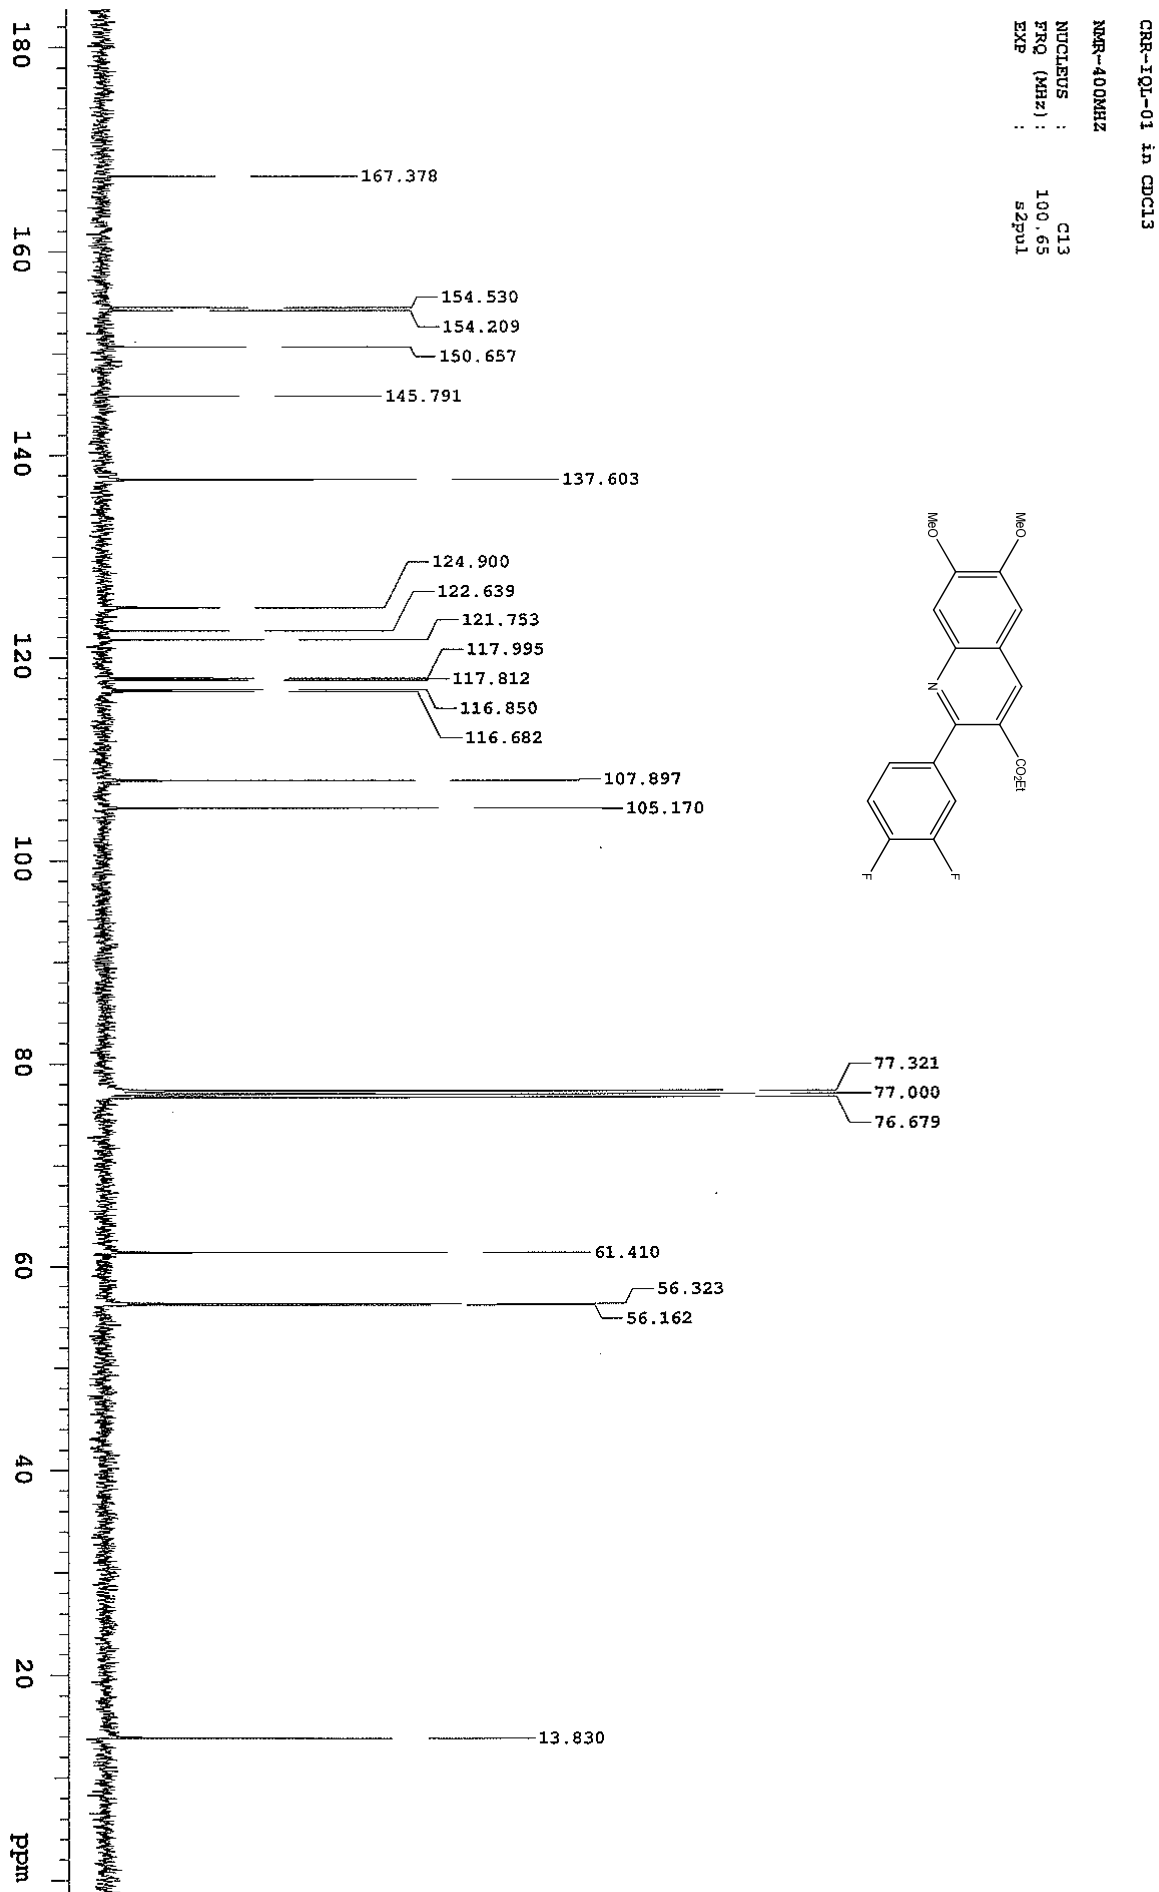

# Elemental Composition Report

## Single Mass Analysis

Tolerance = 5.0 PPM / DBE: min = 0.0, max = 80.0

Element prediction: Off

Number of isotope peaks used for i-FIT = 4

### Monoisotopic Mass, Even Electron Ions

137 formula(e) evaluated with 2 results within limits (up to 4 best isotopic matches for each mass)

Elements Used:

C: 0-30    H: 0-35    N: 0-2    O: 0-4    F: 0-2

CRR-19L/01

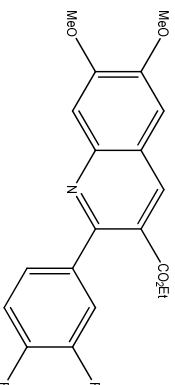

UT1011\_53 27 (0.615) Cm (27:29-71:84x0.010)

1: TOF MS ES+  
1.55e+004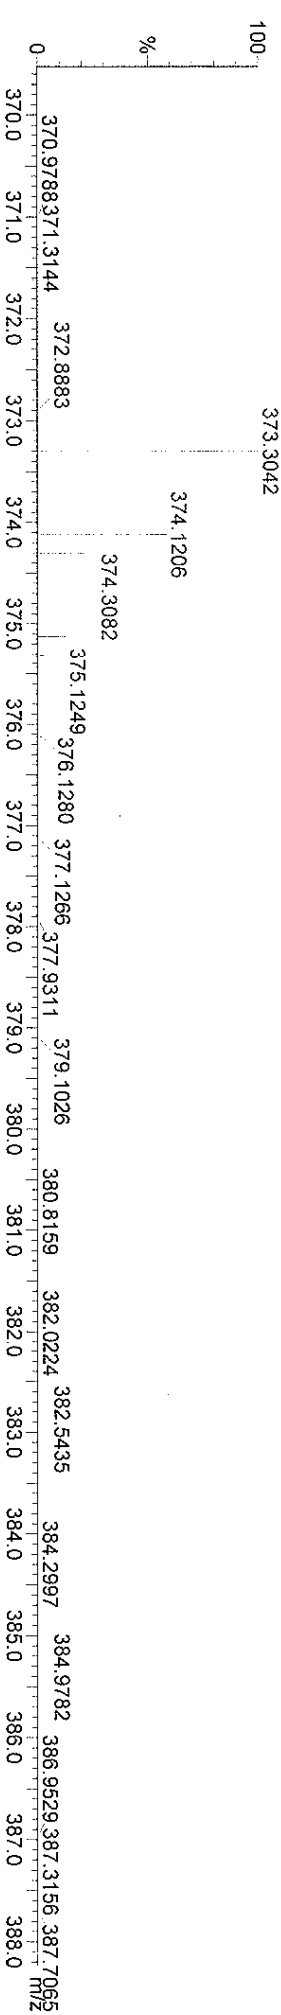

| Minimum: | 5.0        | 0.0  |     |      |       |           |    |    |
|----------|------------|------|-----|------|-------|-----------|----|----|
| Maximum: | 5.0        | 80.0 |     |      |       |           |    |    |
| Mass     | Calc. Mass | mDa  | PPM | DBE  | i-FIT | Formula   |    |    |
| 374.1206 | 374.1204   | 0.2  | 0.5 | 11.5 | 3.9   | C20 H18 N | O4 | F2 |
|          | 374.1192   | 1.4  | 3.7 | 15.5 | 41.0  | C23 H17 N | O3 | F  |

CRR-10L-03 in CDCl3

NMR-400MHz

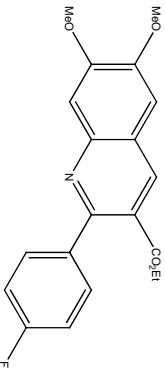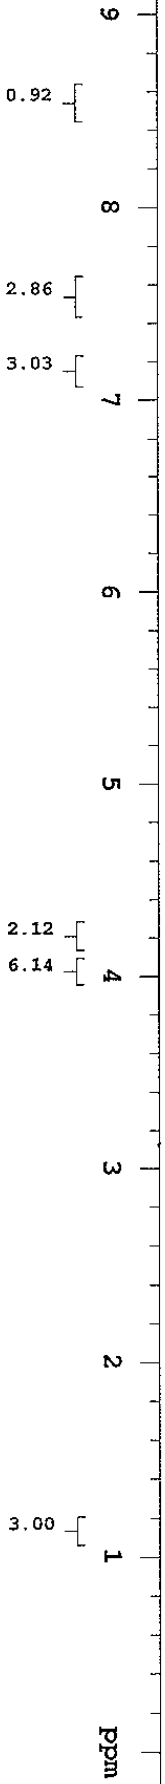

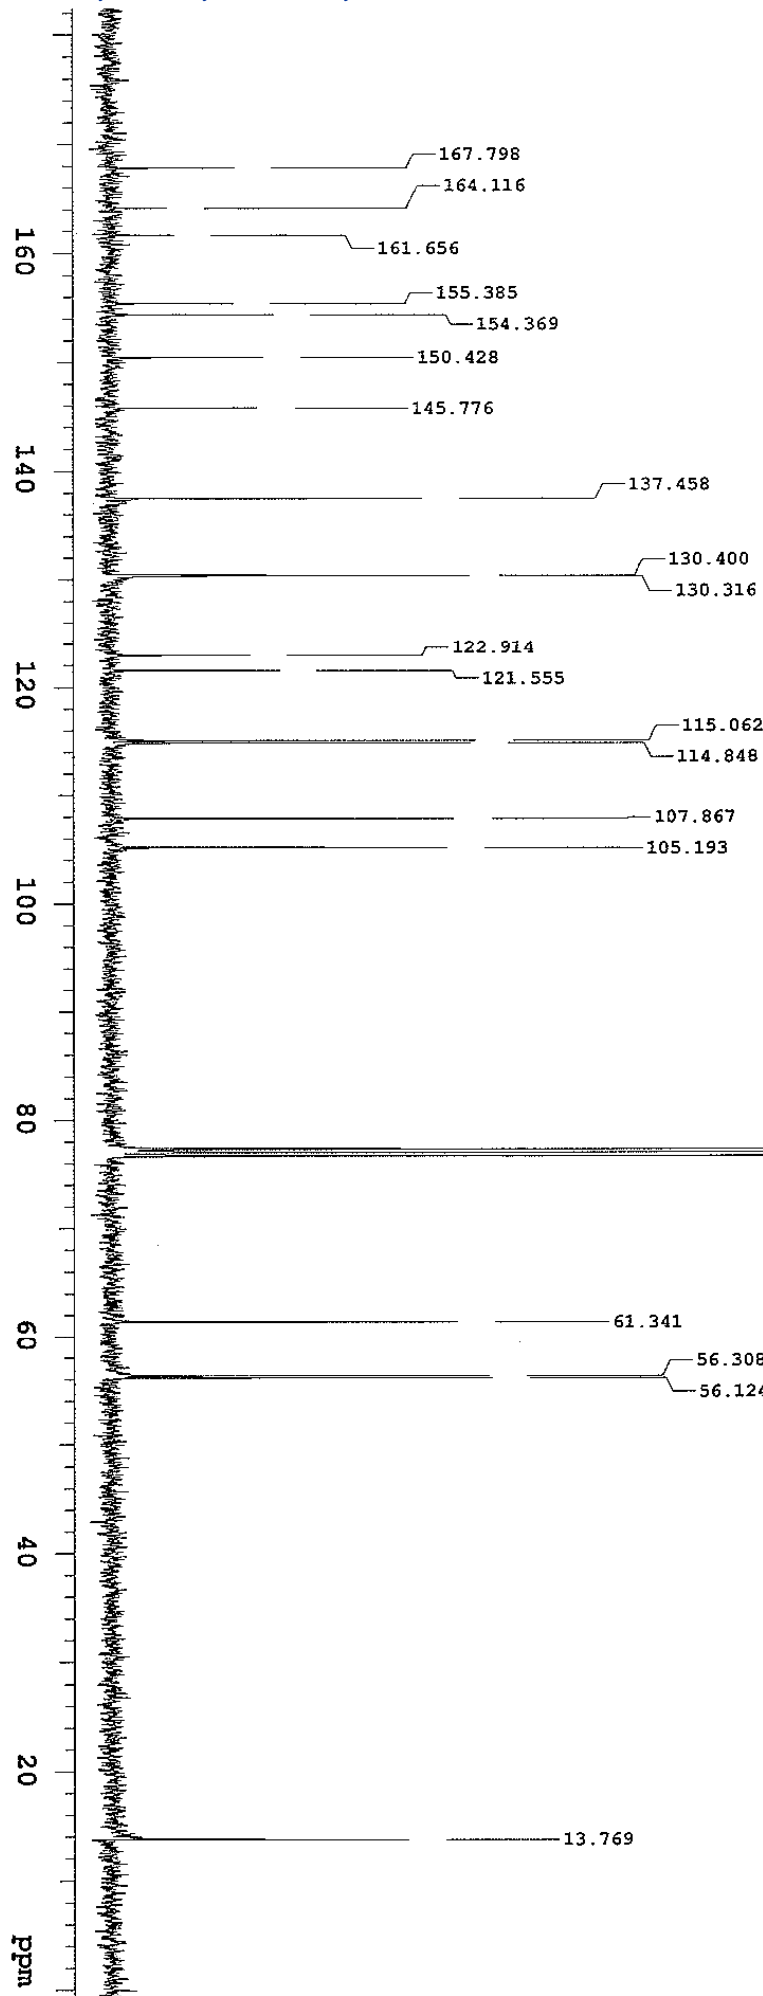

CRR-10L-03 in CDCl3  
NMR-400MHZ  
NUCLEUS : C13  
FREQ (MHz) : 100.65  
EXP : s2pul

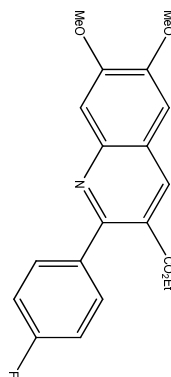

Elemental Composition Report

Single Mass Analysis

Tolerance = 5.0 PPM / DBE: min = 0.0, max = 80.0  
Element prediction: Off  
Number of isotope peaks used for i-FIT = 4

Monoisotopic Mass, Even Electron Ions  
137 formula(e) evaluated with 2 results within limits (up to 4 best isotopic matches for each mass)  
Elements Used:  
C: 0-30 H: 0-35 N: 0-2 O: 0-4 F: 0-2  
CRR-IQL/03

UT1011\_54 27 (0.615) Cm (27.30-73.80x0.010)

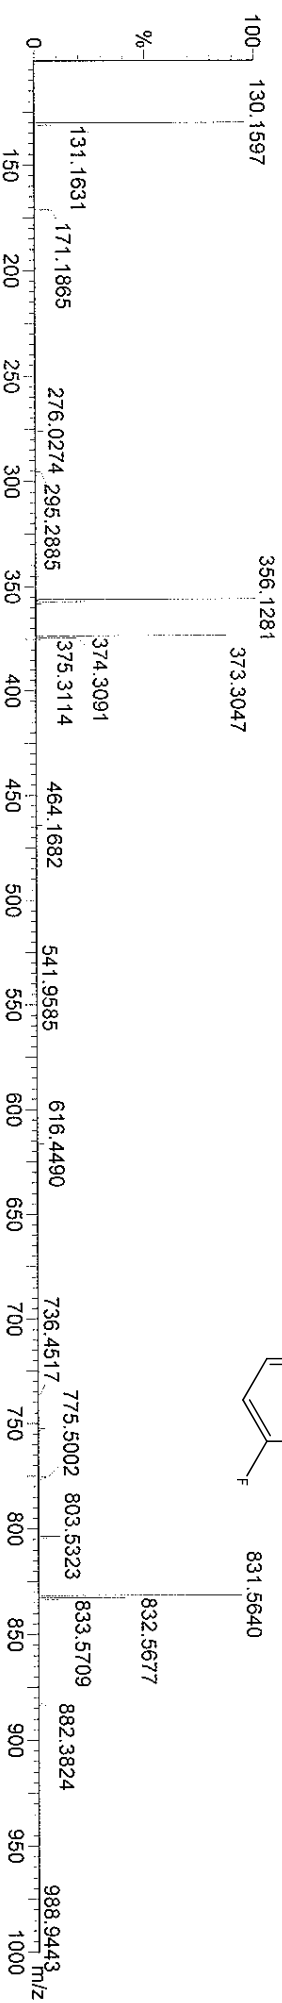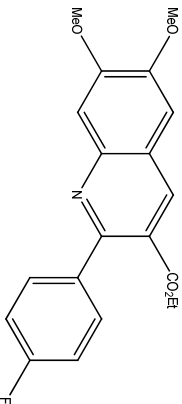

Minimum: 0.3  
Maximum: 80.0

| Mass     | Calc. Mass | mDa  | PPM  | DBE  | i-FIT | Formula        |
|----------|------------|------|------|------|-------|----------------|
| 356.1281 | 356.1298   | -1.7 | -4.8 | 11.5 | 23.5  | C20 H19 N O4 F |
| 356.1287 | 356.1287   | -0.6 | -1.7 | 15.5 | 110.2 | C23 H18 N O3   |

CRR-10L-06 in CDCl3  
NMR-400MHZ

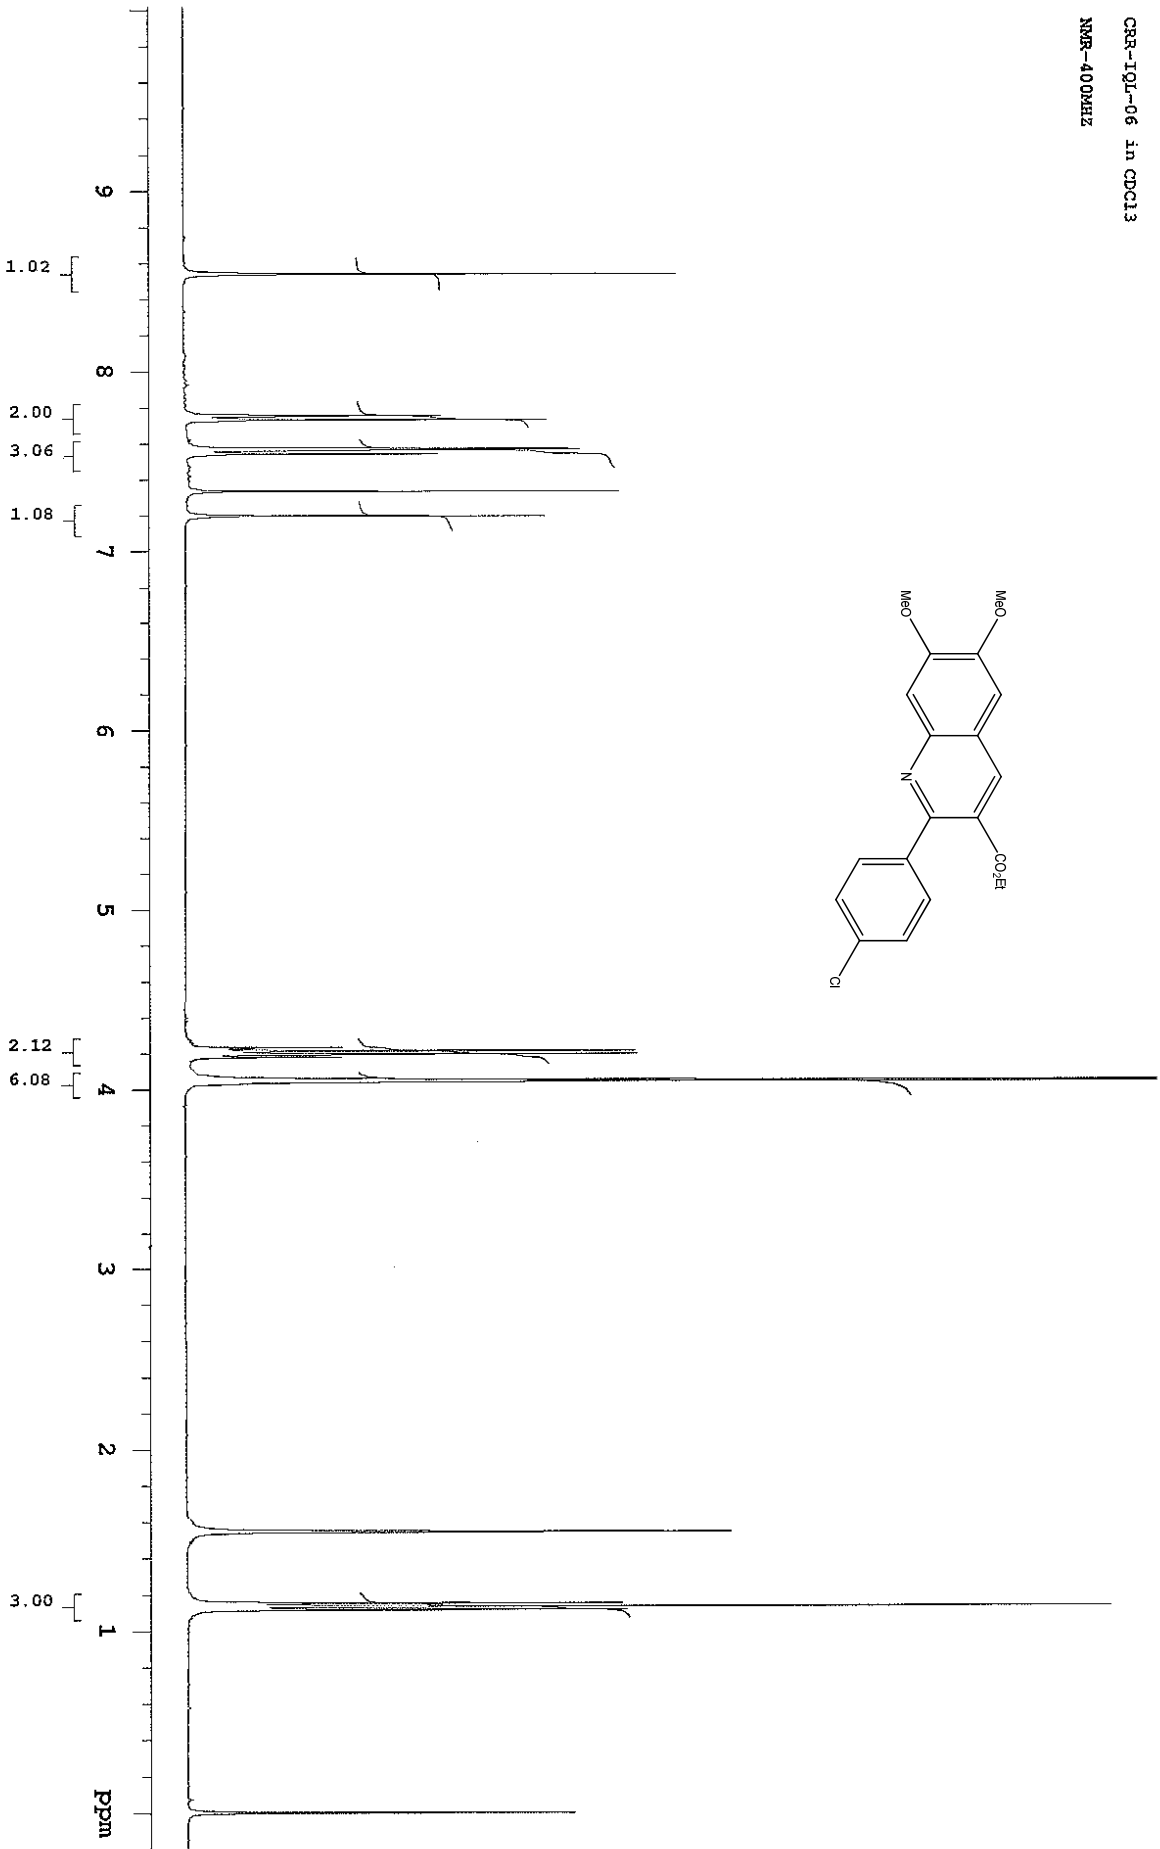

CR3-1QJ-06 in CDCl3

NMR-400MHz  
NUCLEUS : C13  
FREQ (MHz) : 100.65  
EXP : s2pul

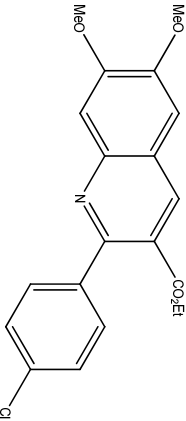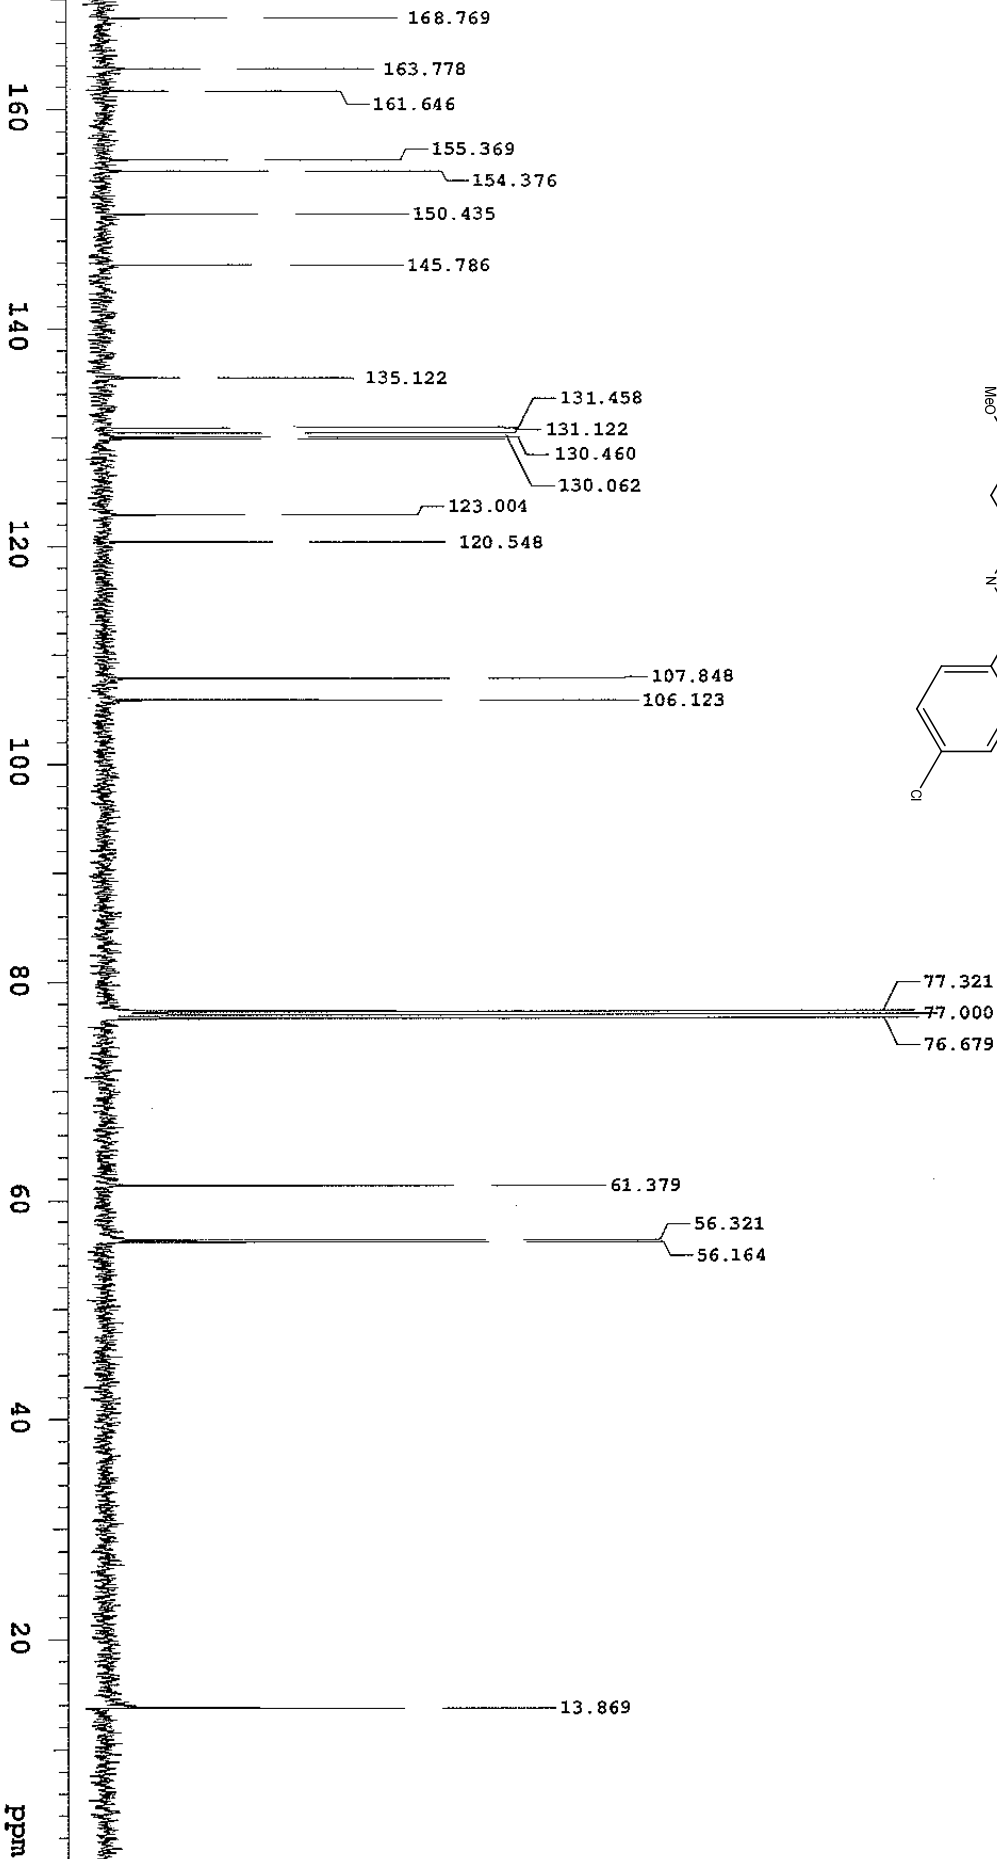

Elemental Composition Report

Single Mass Analysis

Tolerance = 5.0 PPM / DBE: min = 0.0, max = 80.0  
Element prediction: Off  
Number of isotope peaks used for i-FIT = 4

Monoisotopic Mass, Even Electron Ions  
137 formula(e) evaluated with 2 results within limits (up to 4 best isotopic matches for each mass)

Elements Used:  
C: 0-30 H: 0-35 N: 0-2 O: 0-4 Cl: 0-1  
CRR:QL/06

UT1011\_54 27 (0.615) Cm (27:30-73:80x0.010)

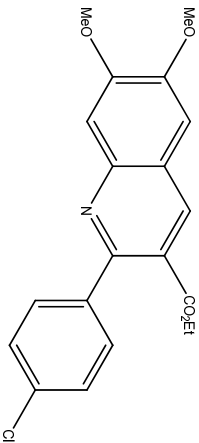

1: TOF MS ES+  
5.39e+002

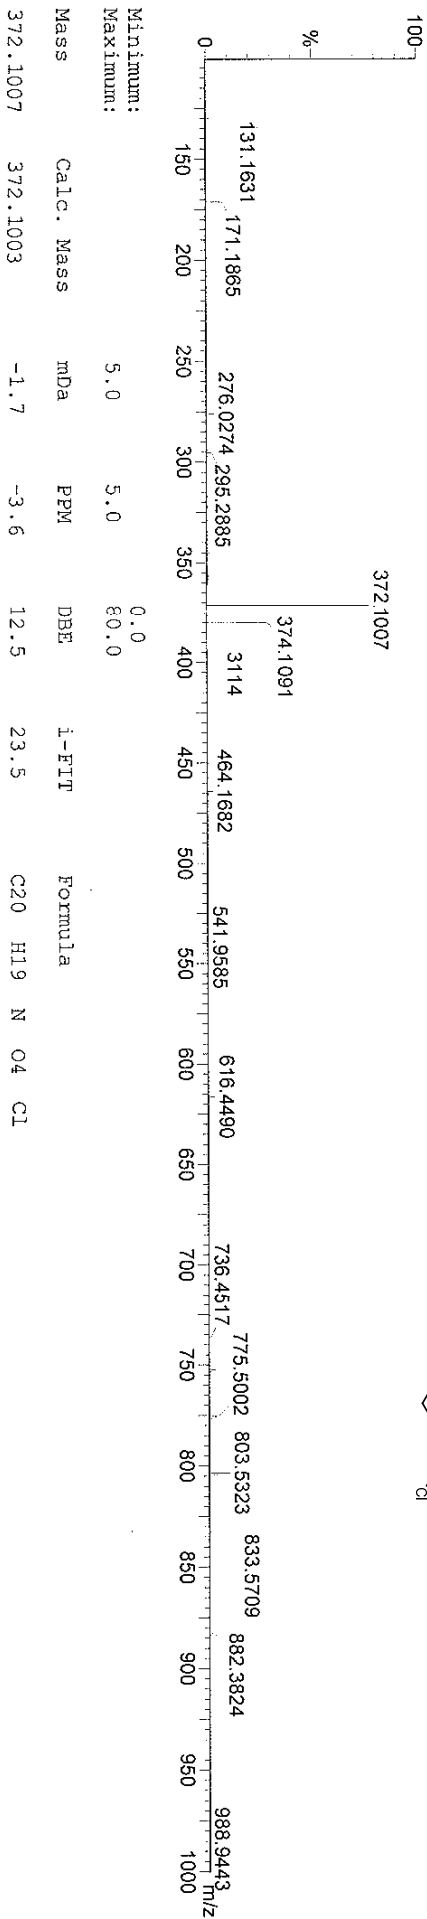

CRR-1Q1-04 in CDCl3  
NMR-400MHZ

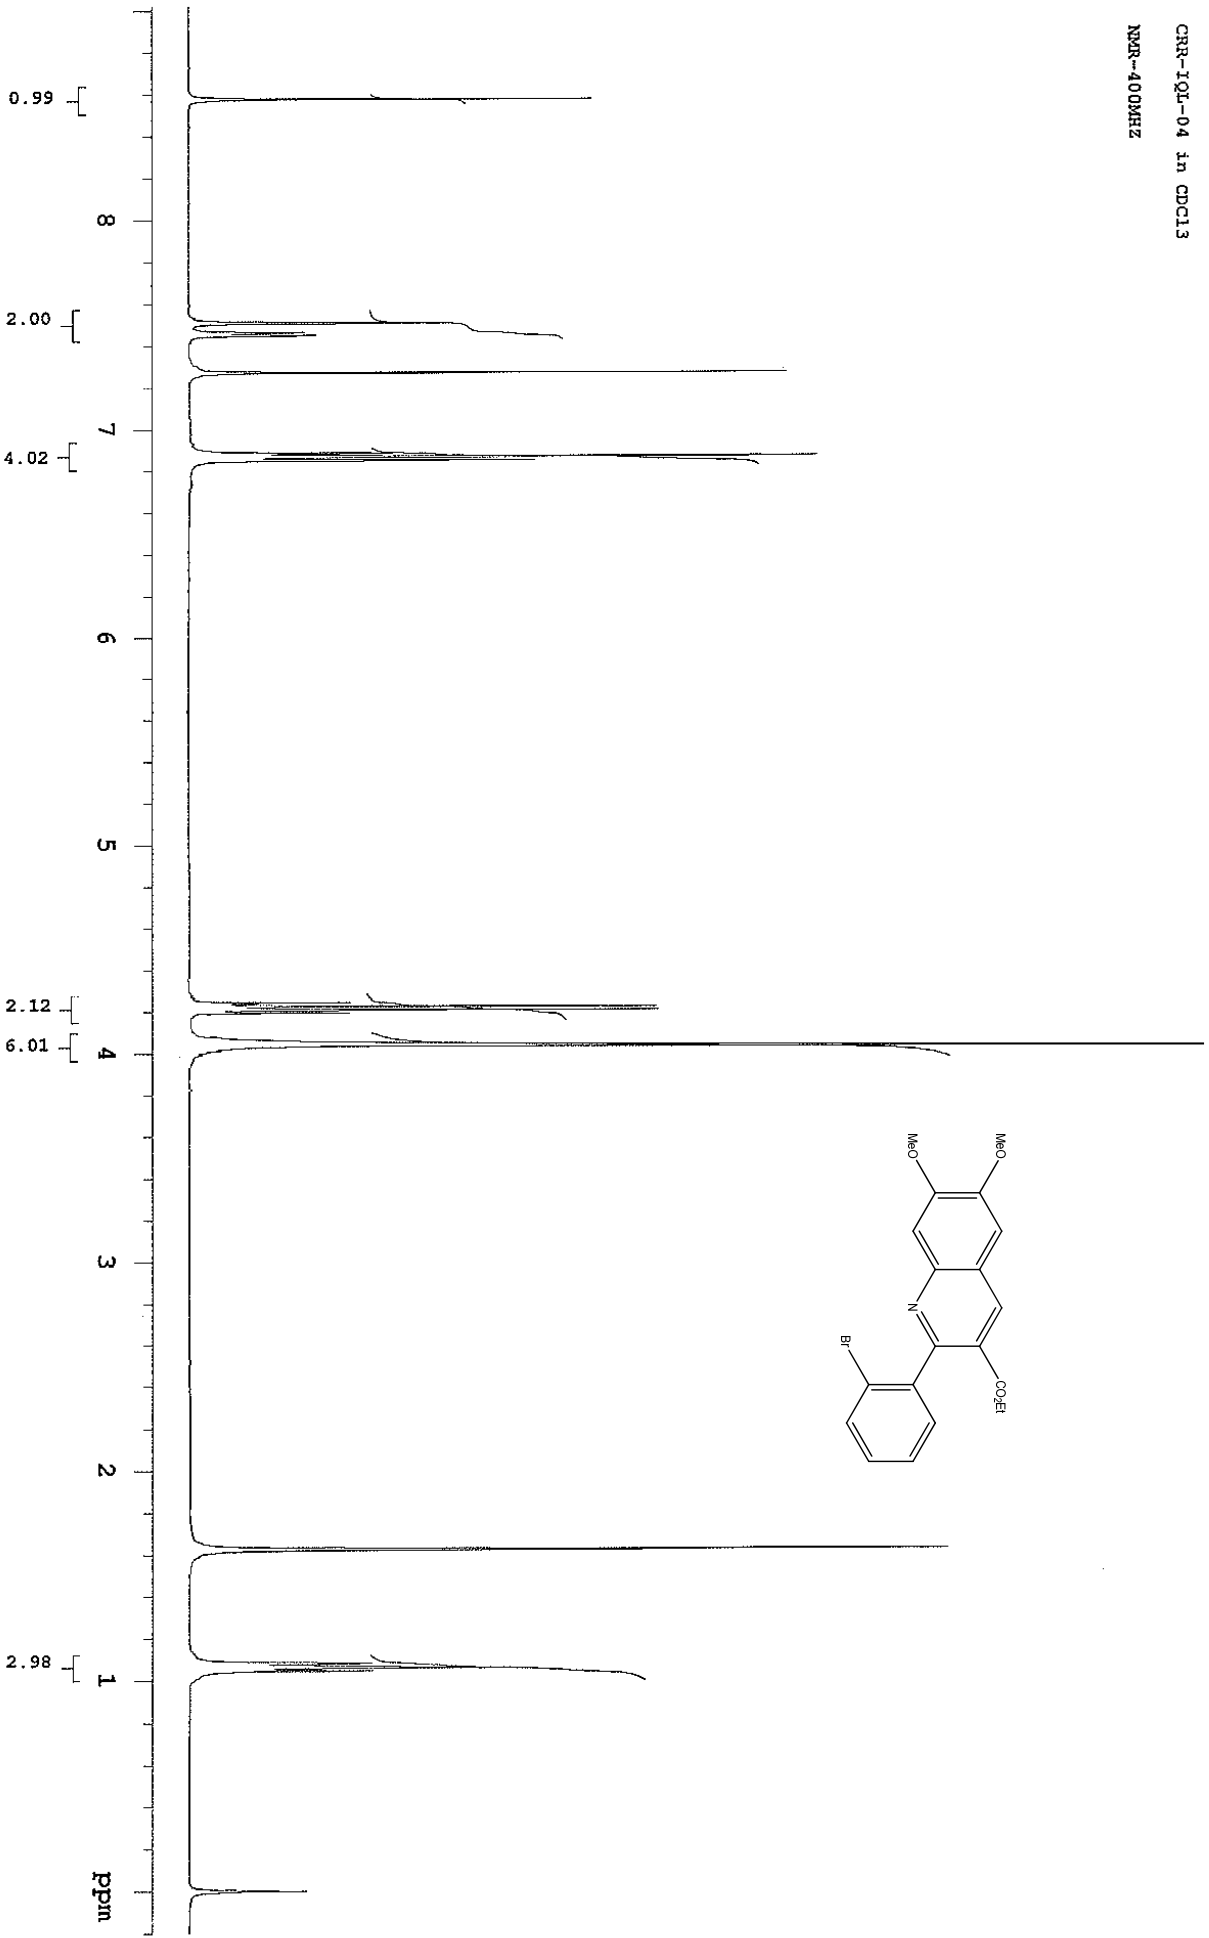

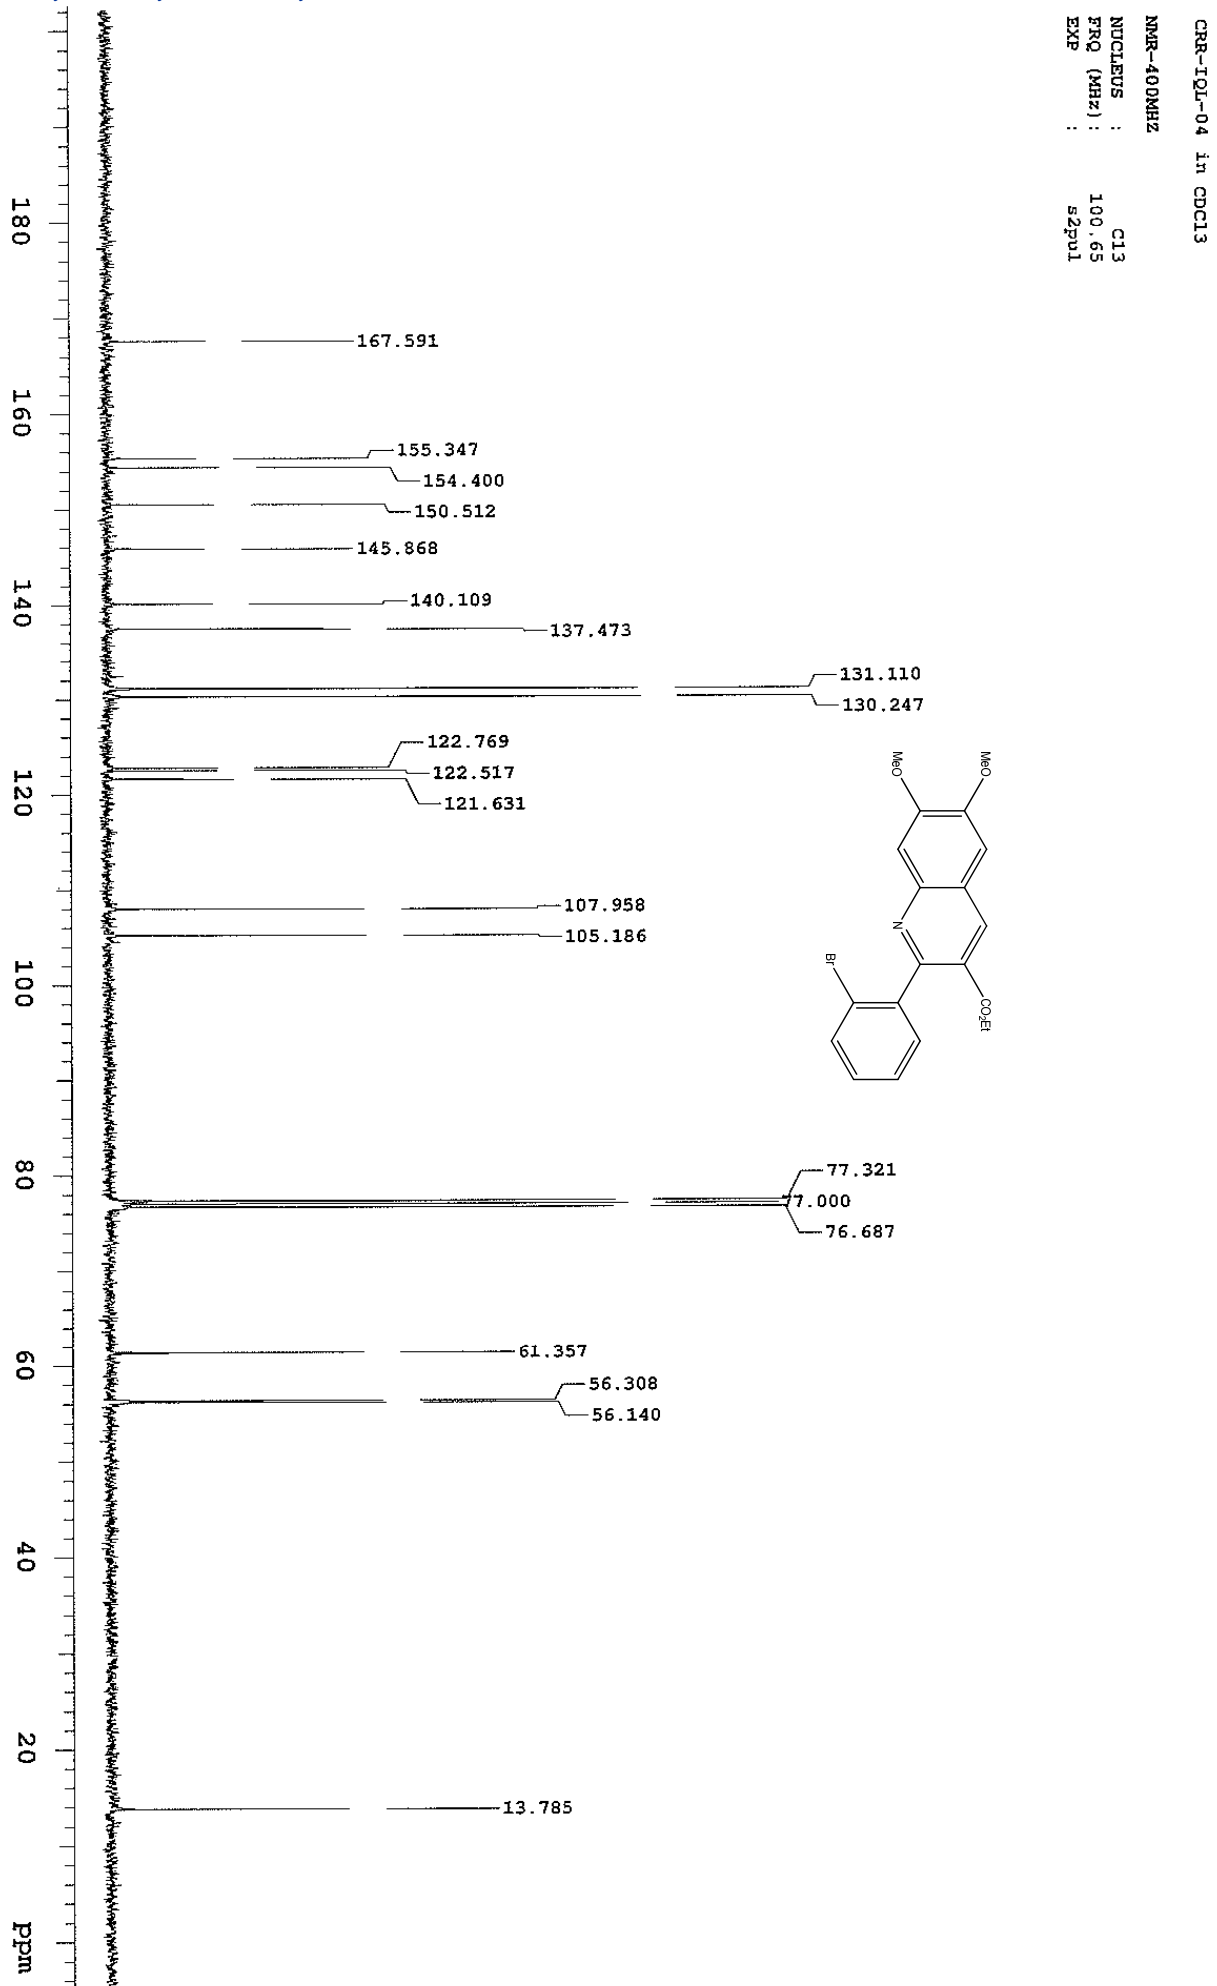

Tolerance = 5.0 PPM / DBE: min = -2.0, max = 80.0  
 Element prediction: Off  
 Number of isotope peaks used for iFIT = 4

Number of isotope peaks used for i-FIT = 4

Monoisotopic Mass, Even Electron Ions  
25 formula(e) evaluated with 1 results within limits (up to 10 best isotopic matches for each mass)

Elements Used:

C: 0-25    H: 0-25    N: 0-1    O: 0-4    Br: 0-1

CRR/ICL/04

UT1111\_91 25 (0.580) Cm (25-1:3x0.010)

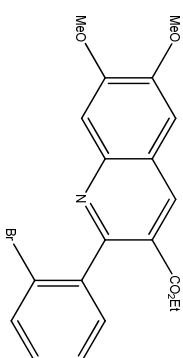

1: TOF MS ES+  
4.57e+004

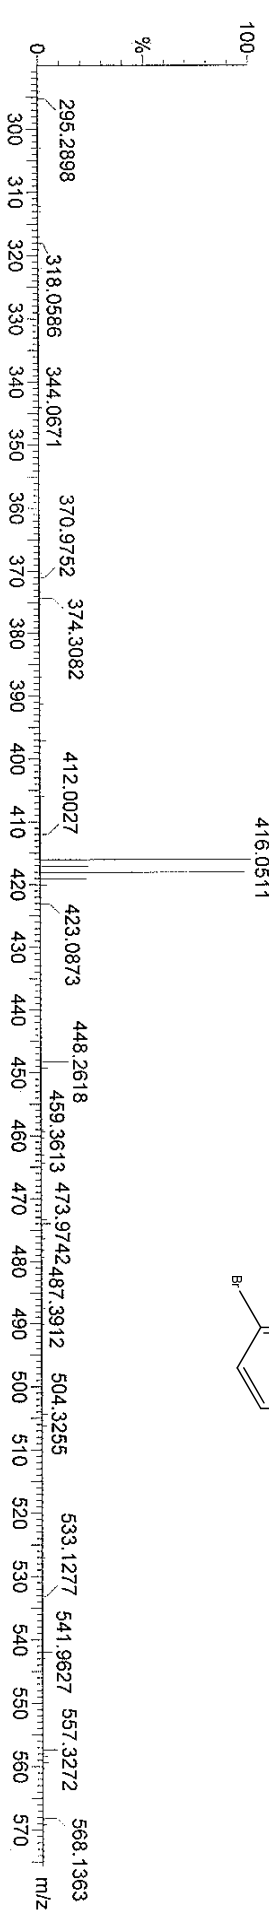

|          |            |     |     |      |       |                 |  |
|----------|------------|-----|-----|------|-------|-----------------|--|
| Minimum: |            | 5.0 | 5.0 | -2.0 |       |                 |  |
| Maximum: |            |     |     | 80.0 |       |                 |  |
| Mass     | Calc. Mass | mda | PPM | DBE  | 1-FIT | Formula         |  |
| 416.0511 | 416.0497   | 1.4 | 2.6 | 11.5 | 1.6   | C20 H19 N O4 Br |  |

CRM-1QL-05 in CDCl3  
NMR 400MHz

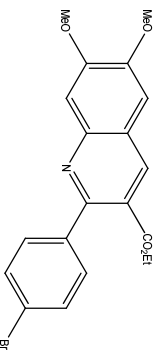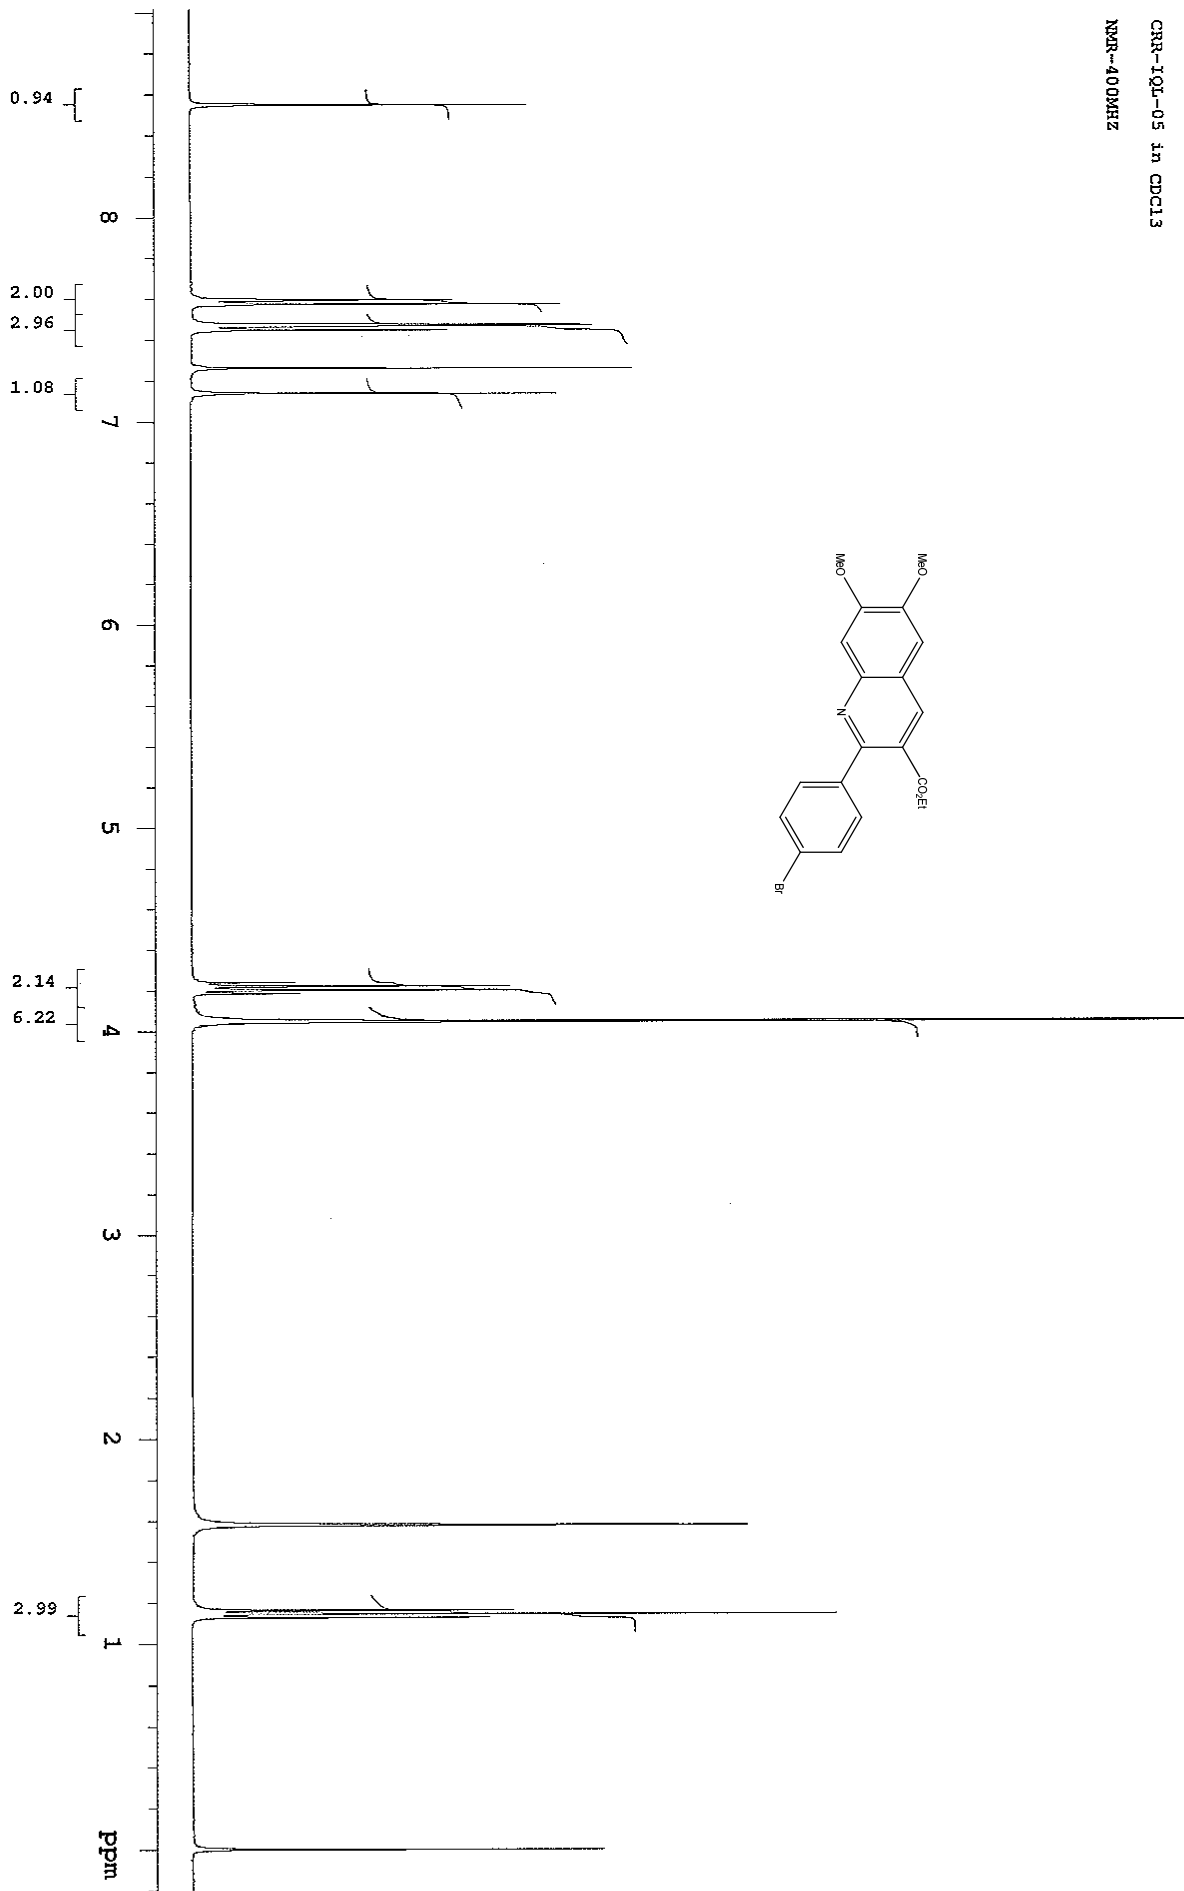

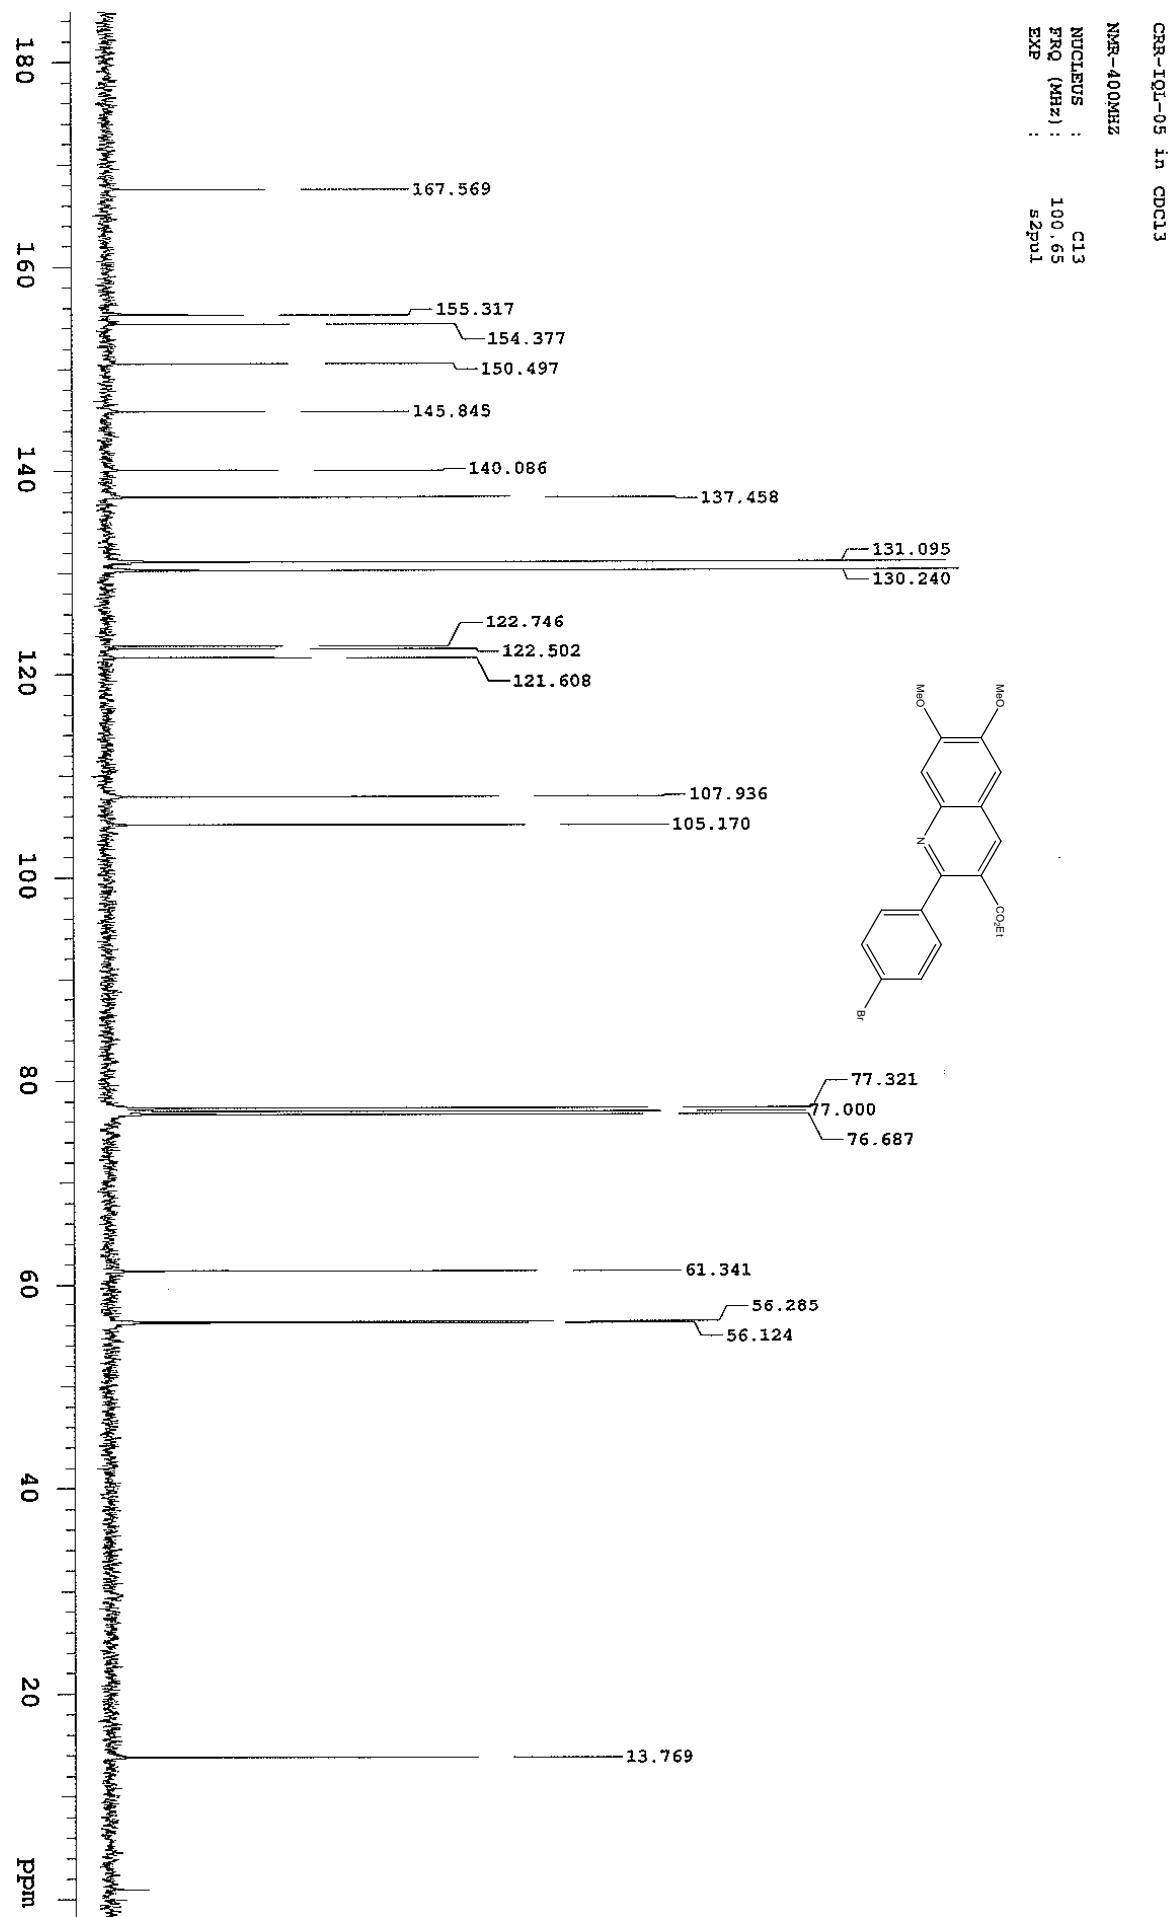

Elemental Composition Report

Single Mass Analysis

Tolerance = 5.0 PPM / DBE: min = -2.0, max = 80.0  
Element prediction: Off  
Number of isotope peaks used for i-FIT = 4

Monoisotopic Mass, Even Electron Ions  
25 formula(e) evaluated with 1 results within limits (up to 10 best isotopic matches for each mass)  
Elements Used:  
C: 0-25 H: 0-25 N: 0-1 O: 0-4 Br: 0-1

CRR/QL/05

UT1111\_91 25 (0.580) Cm (25-1.3x0.010)

1: TOF MS ES+  
3.25e+003

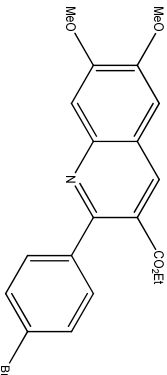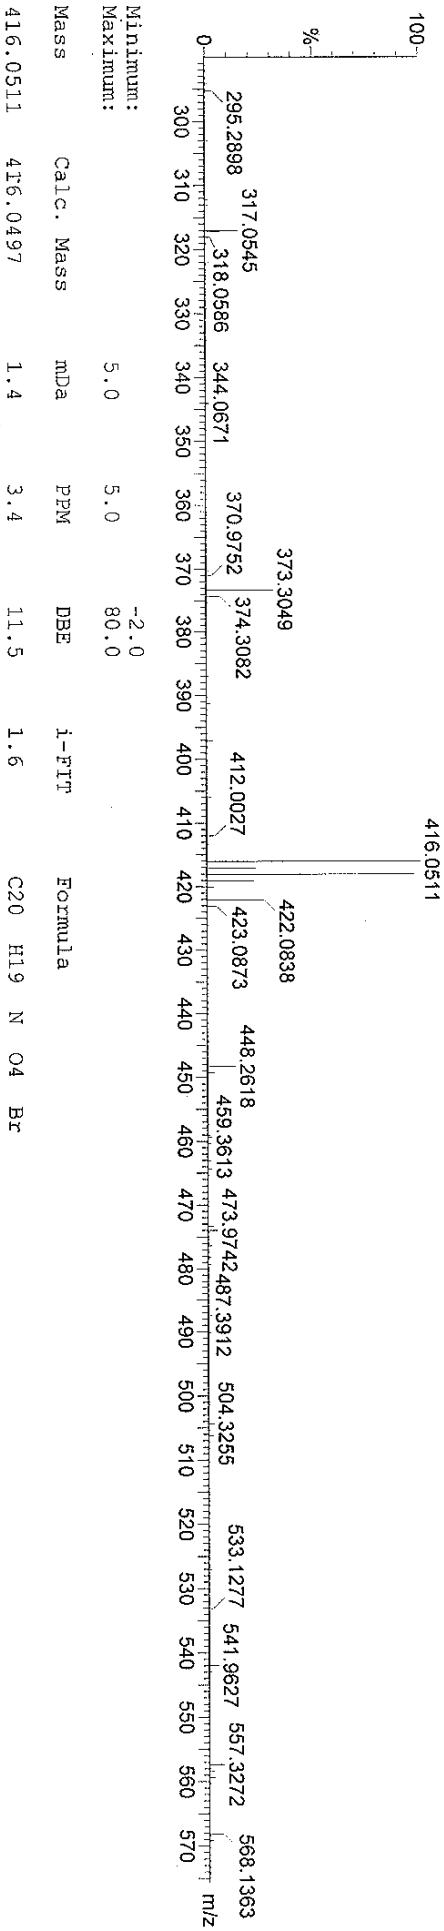

Minimum: -2.0  
Maximum: 80.0

| Mass     | Calc. Mass | mDa | PPM | DBE  | i-FIT | Formula         |
|----------|------------|-----|-----|------|-------|-----------------|
| 416.0511 | 416.0497   | 1.4 | 3.4 | 11.5 | 1.6   | C20 H19 N O4 Br |

CRR-10L-10 in CDCl3  
NMR-400MHz

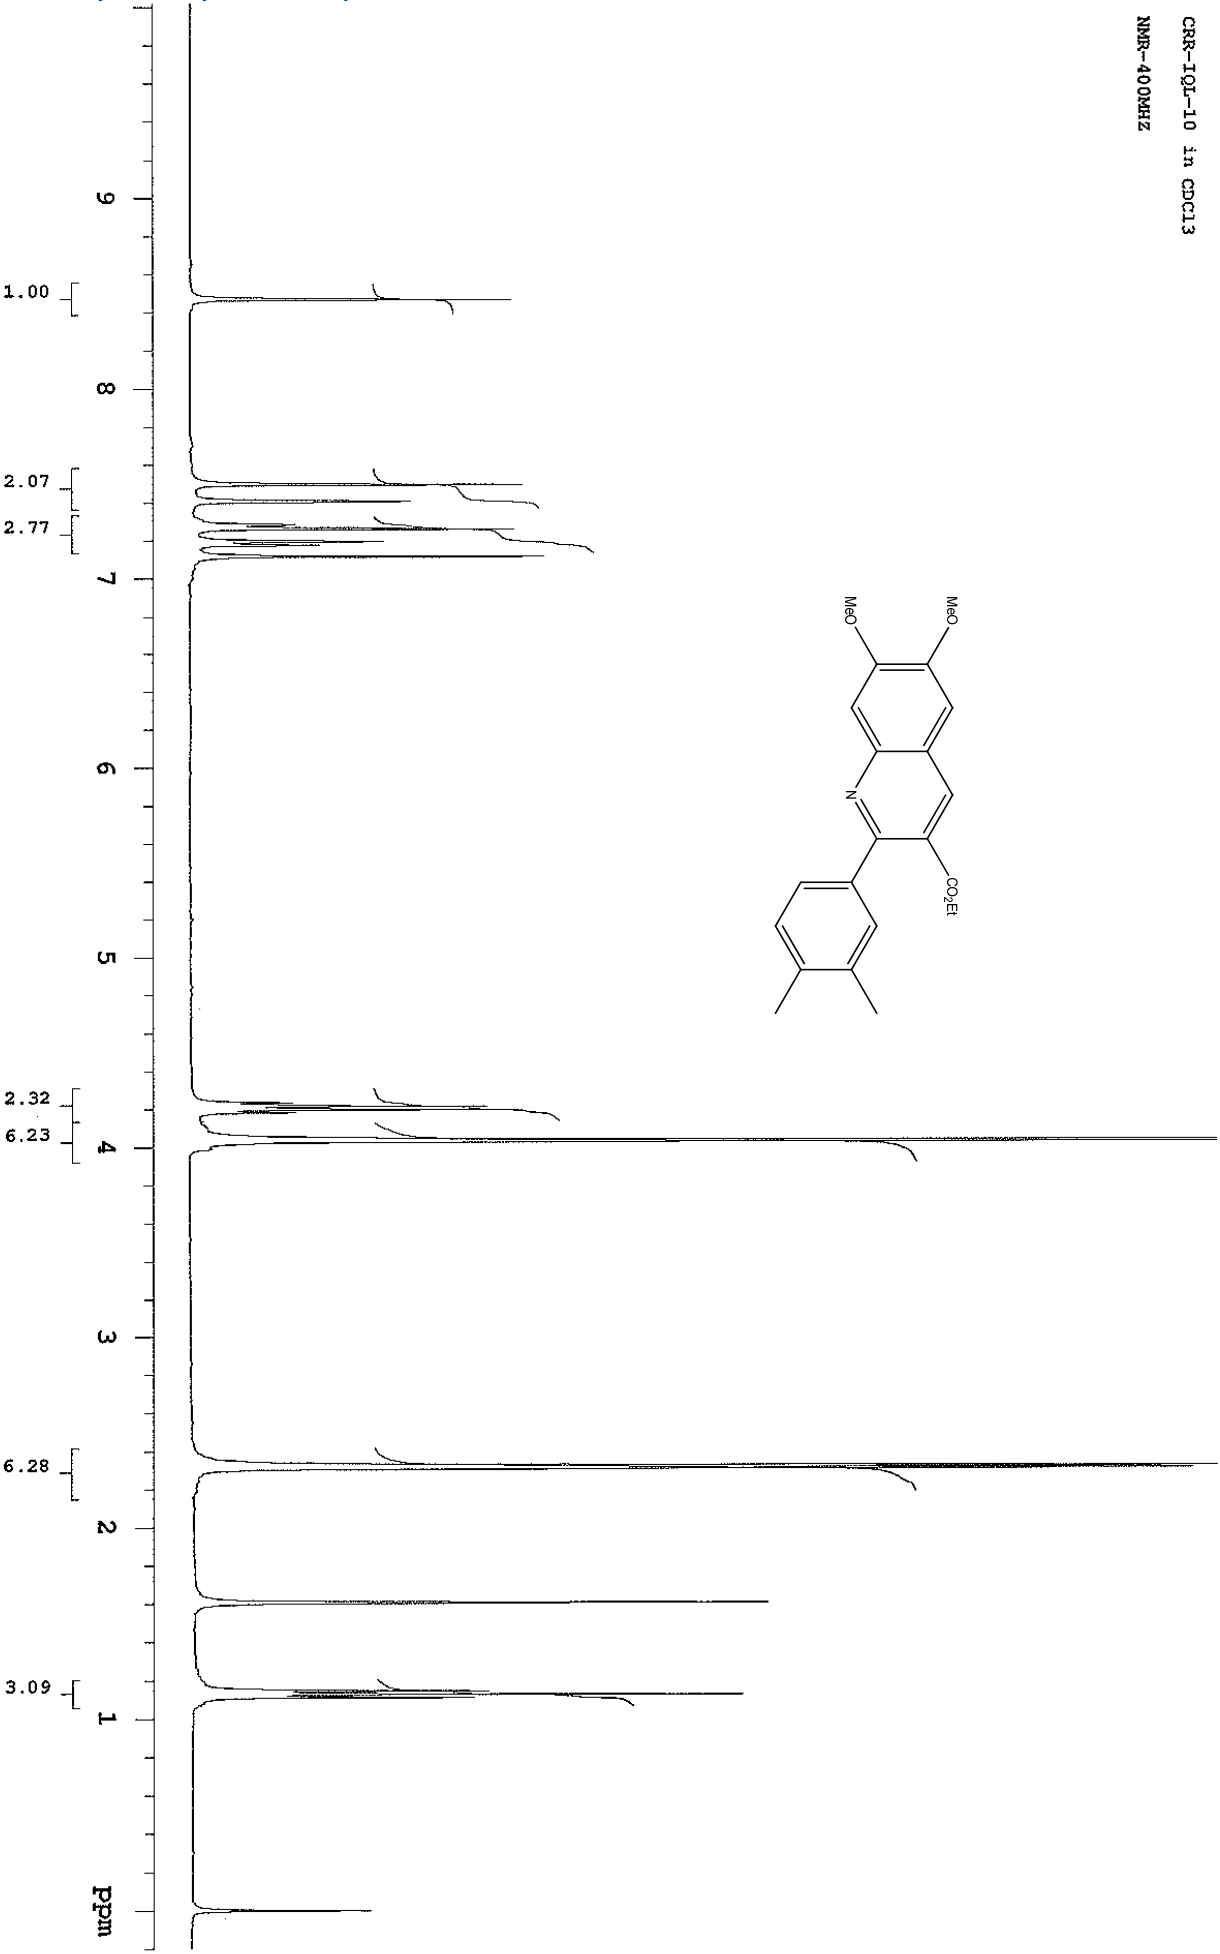

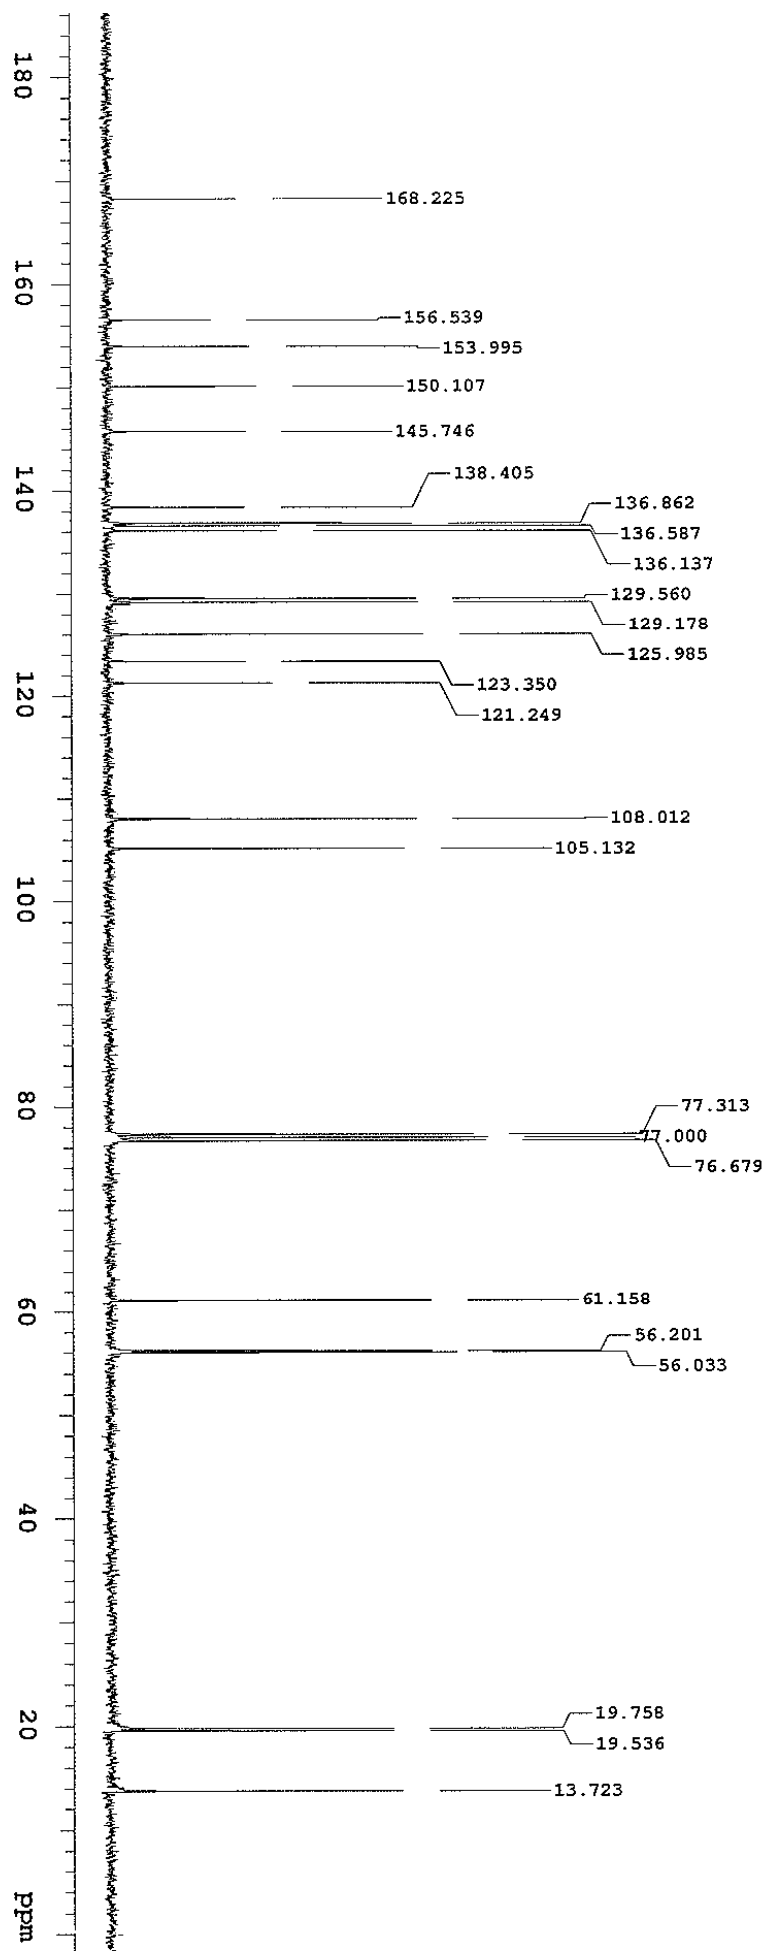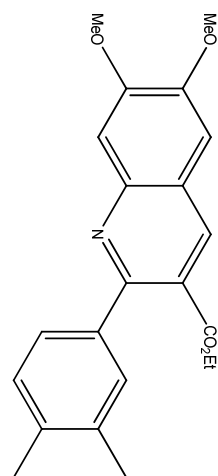

CR-101-10 in CDCl<sub>3</sub>  
NMR-400MHZ  
NUCLEUS : C13  
FRO (MHz) : 100.65  
EXP : s2pul

Elemental Composition Report

Single Mass Analysis

Tolerance = 10.0 PPM / DBE: min = -2.0, max = 80.0

Element prediction: Off

Number of isotope peaks used for i-FIT = 2

Monoisotopic Mass, Even Electron Ions  
112 formula(e) evaluated with 1 results within limits (up to 5 best isotopic matches for each mass)

Elements Used:

C: 0-23 H: 0-25 N: 0-2 O: 0-5 S: 0-3

CRR-IQ1-10

UT1112\_36 33 (0.621) Cm (33.36-57.81x0.010)

1: TOF MS ES+  
3.13e+003

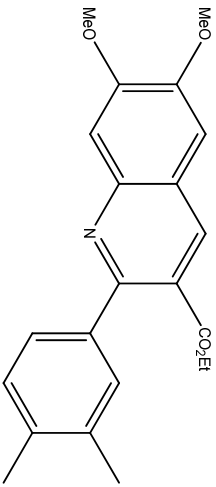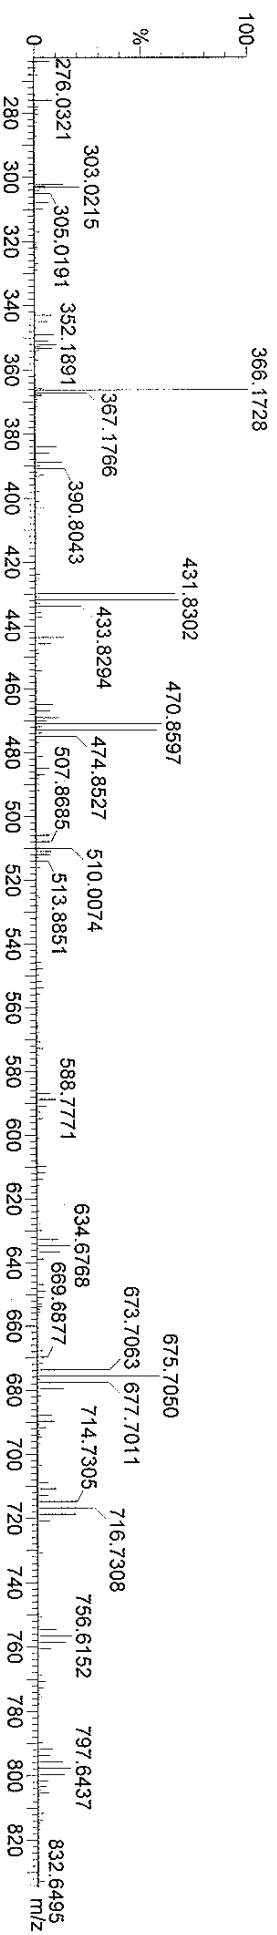

Minimum: -2.0  
Maximum: 80.0

| Mass     | Calc. Mass | mDa | PPM | DBE  | i-FIT | Formula      |
|----------|------------|-----|-----|------|-------|--------------|
| 366.1728 | 366.1705   | 2.3 | 6.3 | 11.5 | 1.3   | C22 H24 N O4 |

CRR-101-07 in CDCl<sub>3</sub>  
NMR-400MHz

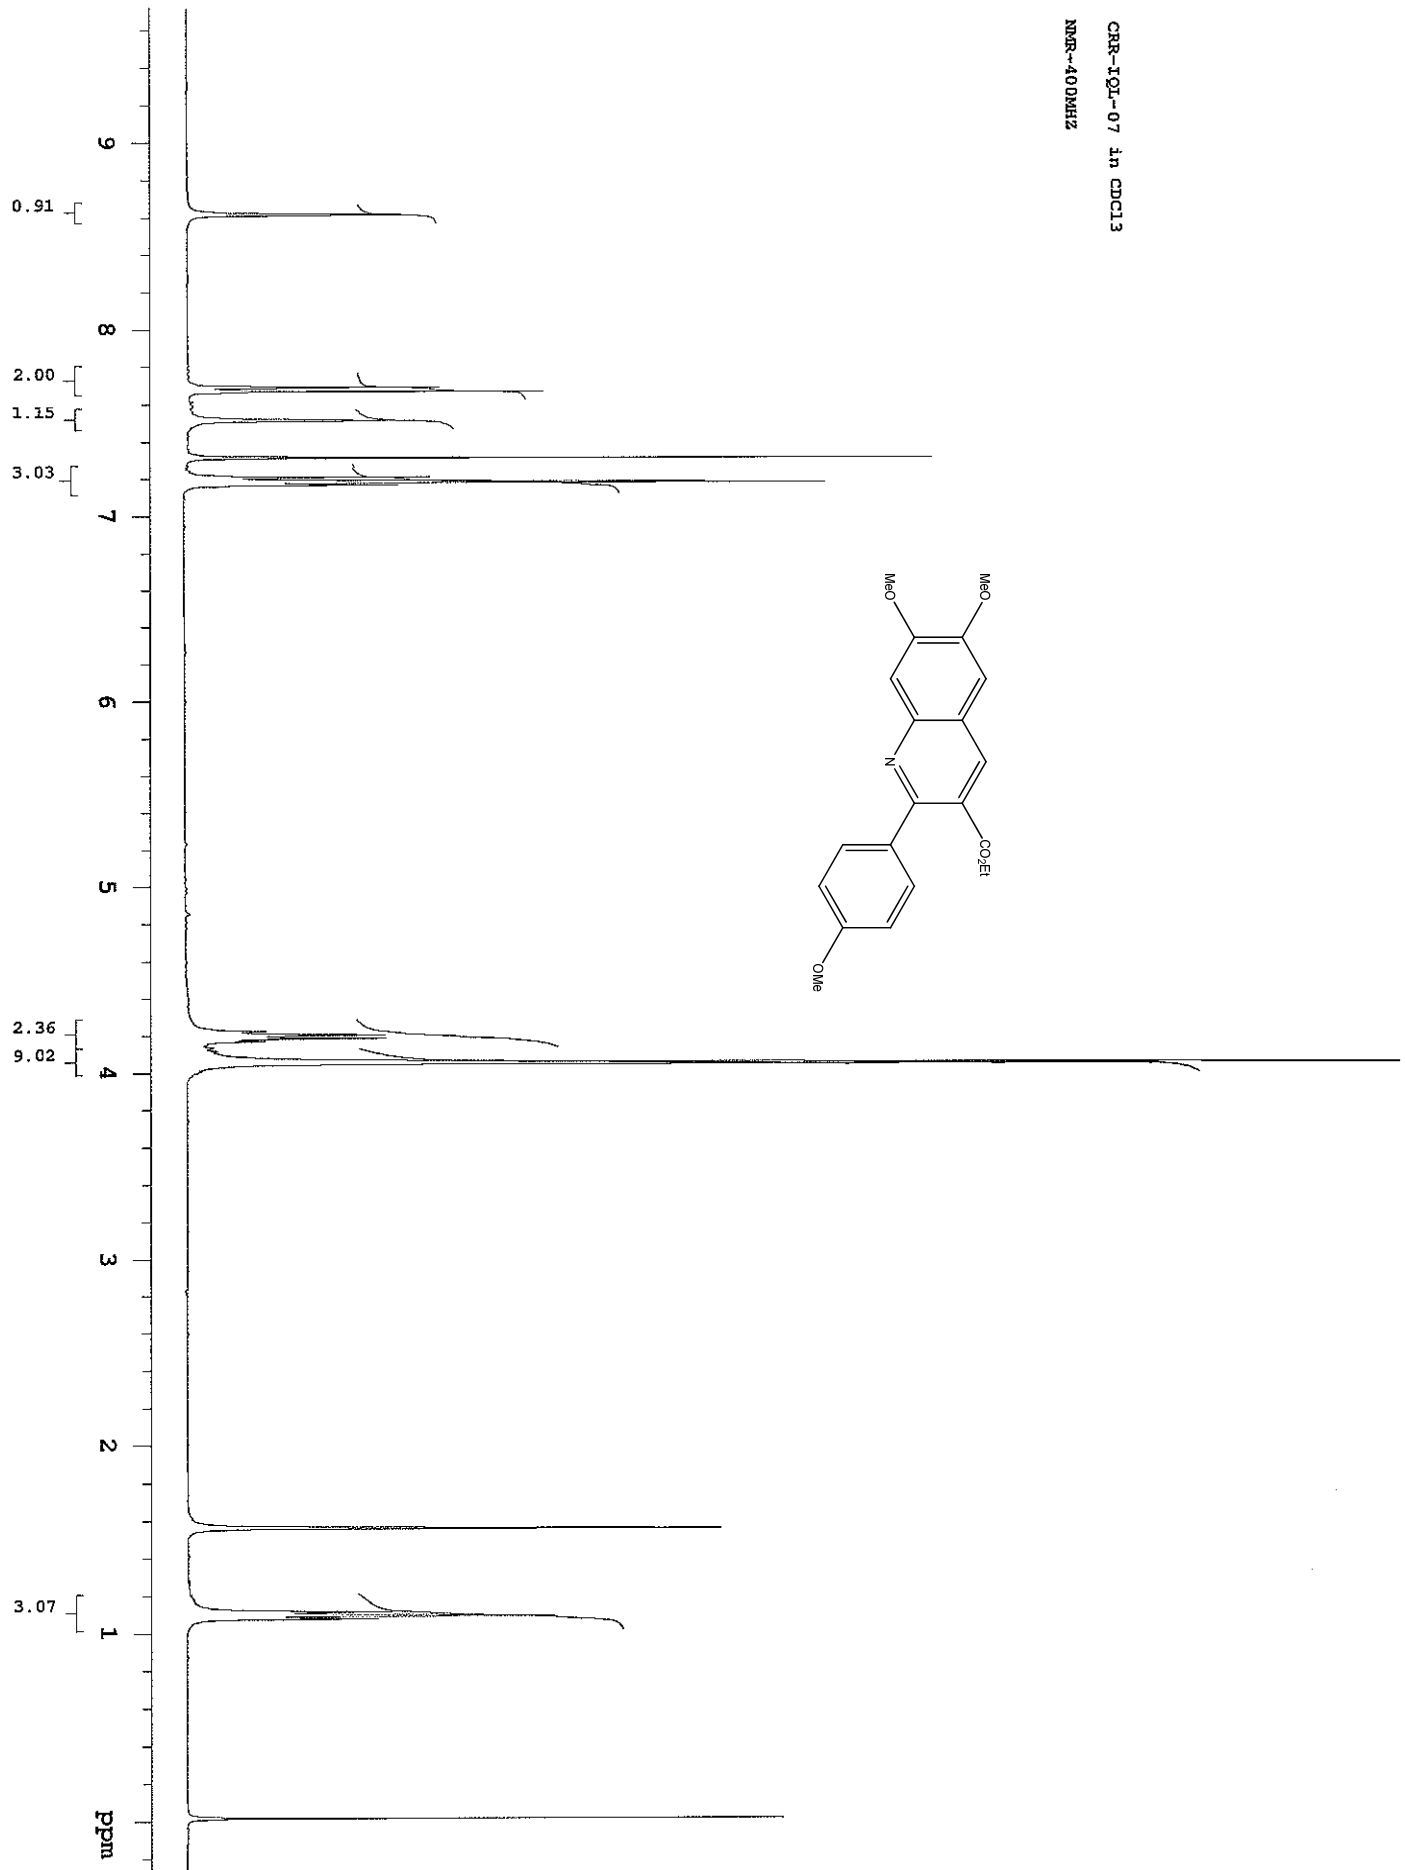

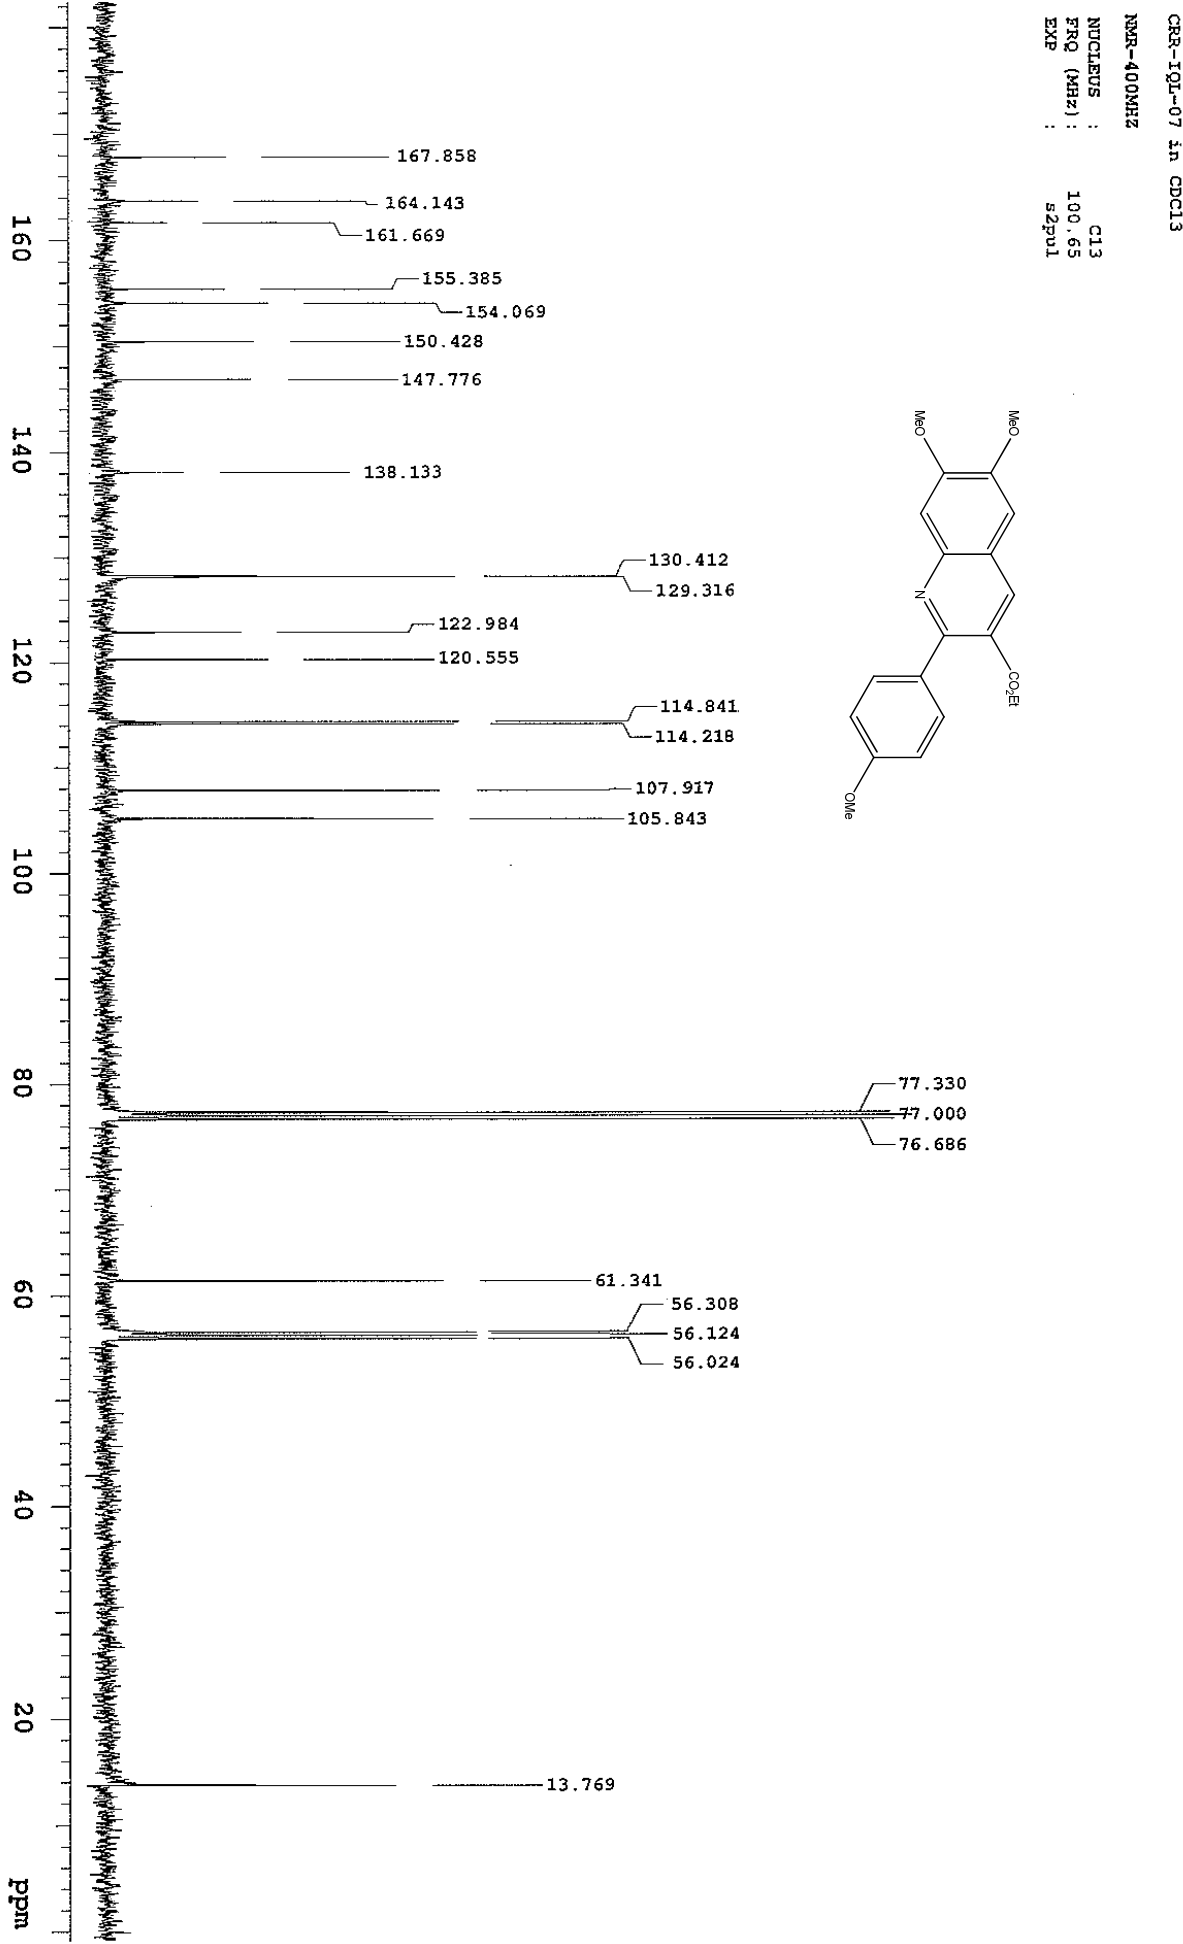

Elemental Composition Report

Single Mass Analysis

Tolerance = 5.0 PPM / DBE: min = 0.0, max = 80.0  
Element prediction: Off  
Number of isotope peaks used for i-FIT = 4

Monoisotopic Mass, Even Electron Ions  
166 formula(e) evaluated with 2 results within limits (up to 4 best isotopic matches for each mass)  
Elements Used:  
C: 0-30 H: 0-35 N: 0-2 O: 0-5  
CRR-IQL07

UT1011\_59 23 (0.523) Cm (29:36-68 80x0.010)

1: TOF MS ES+  
5.39e+004

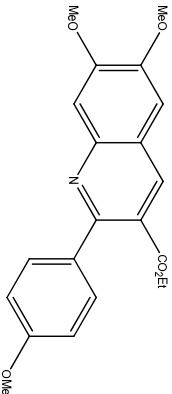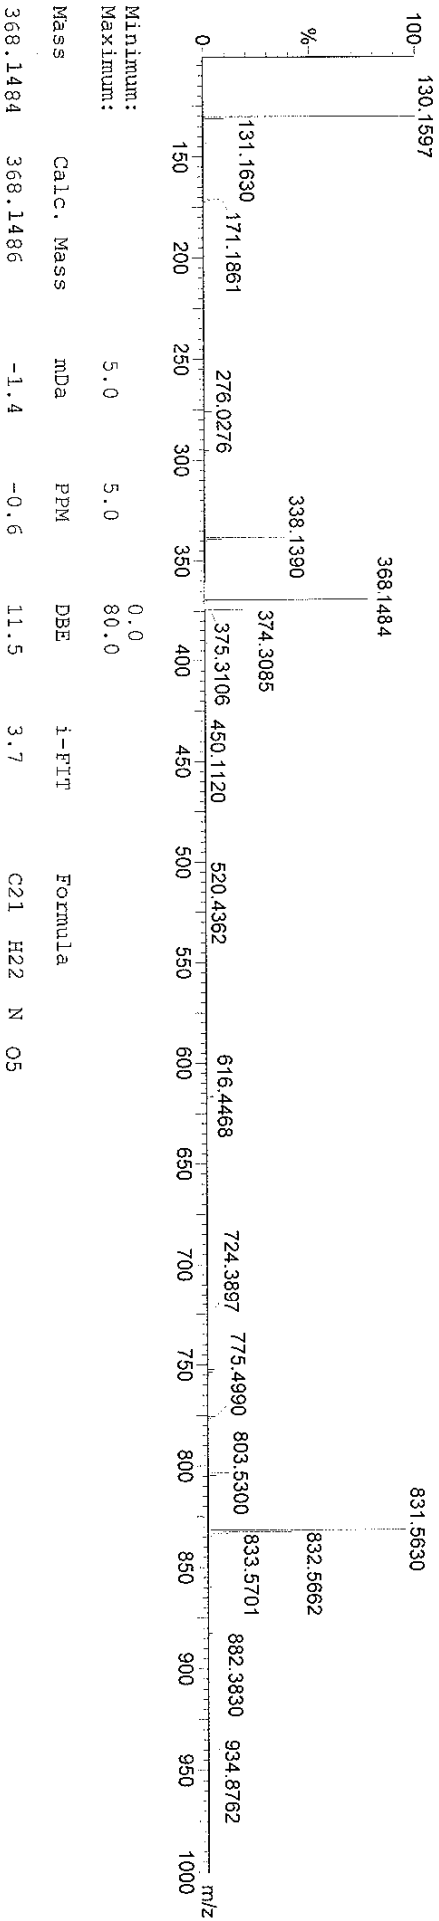

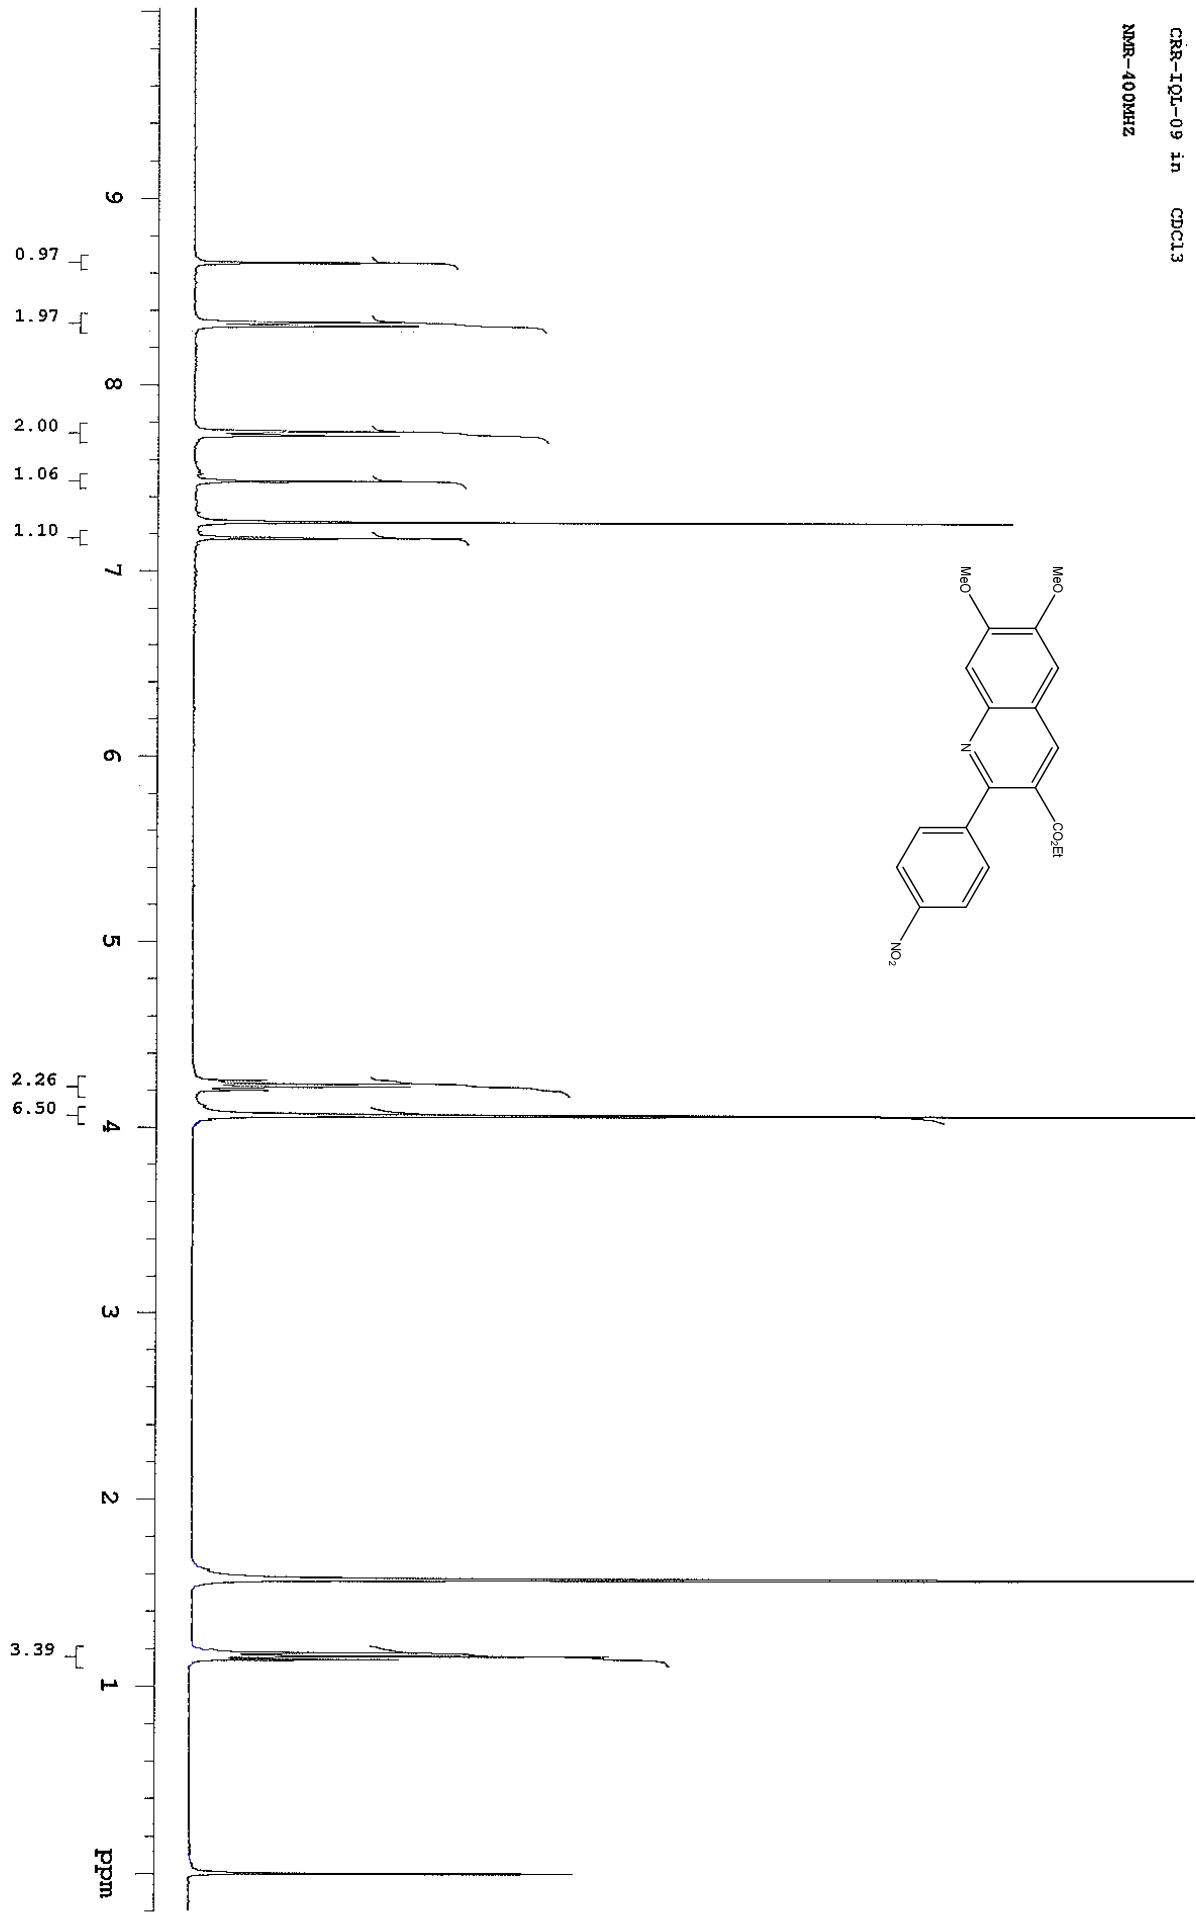

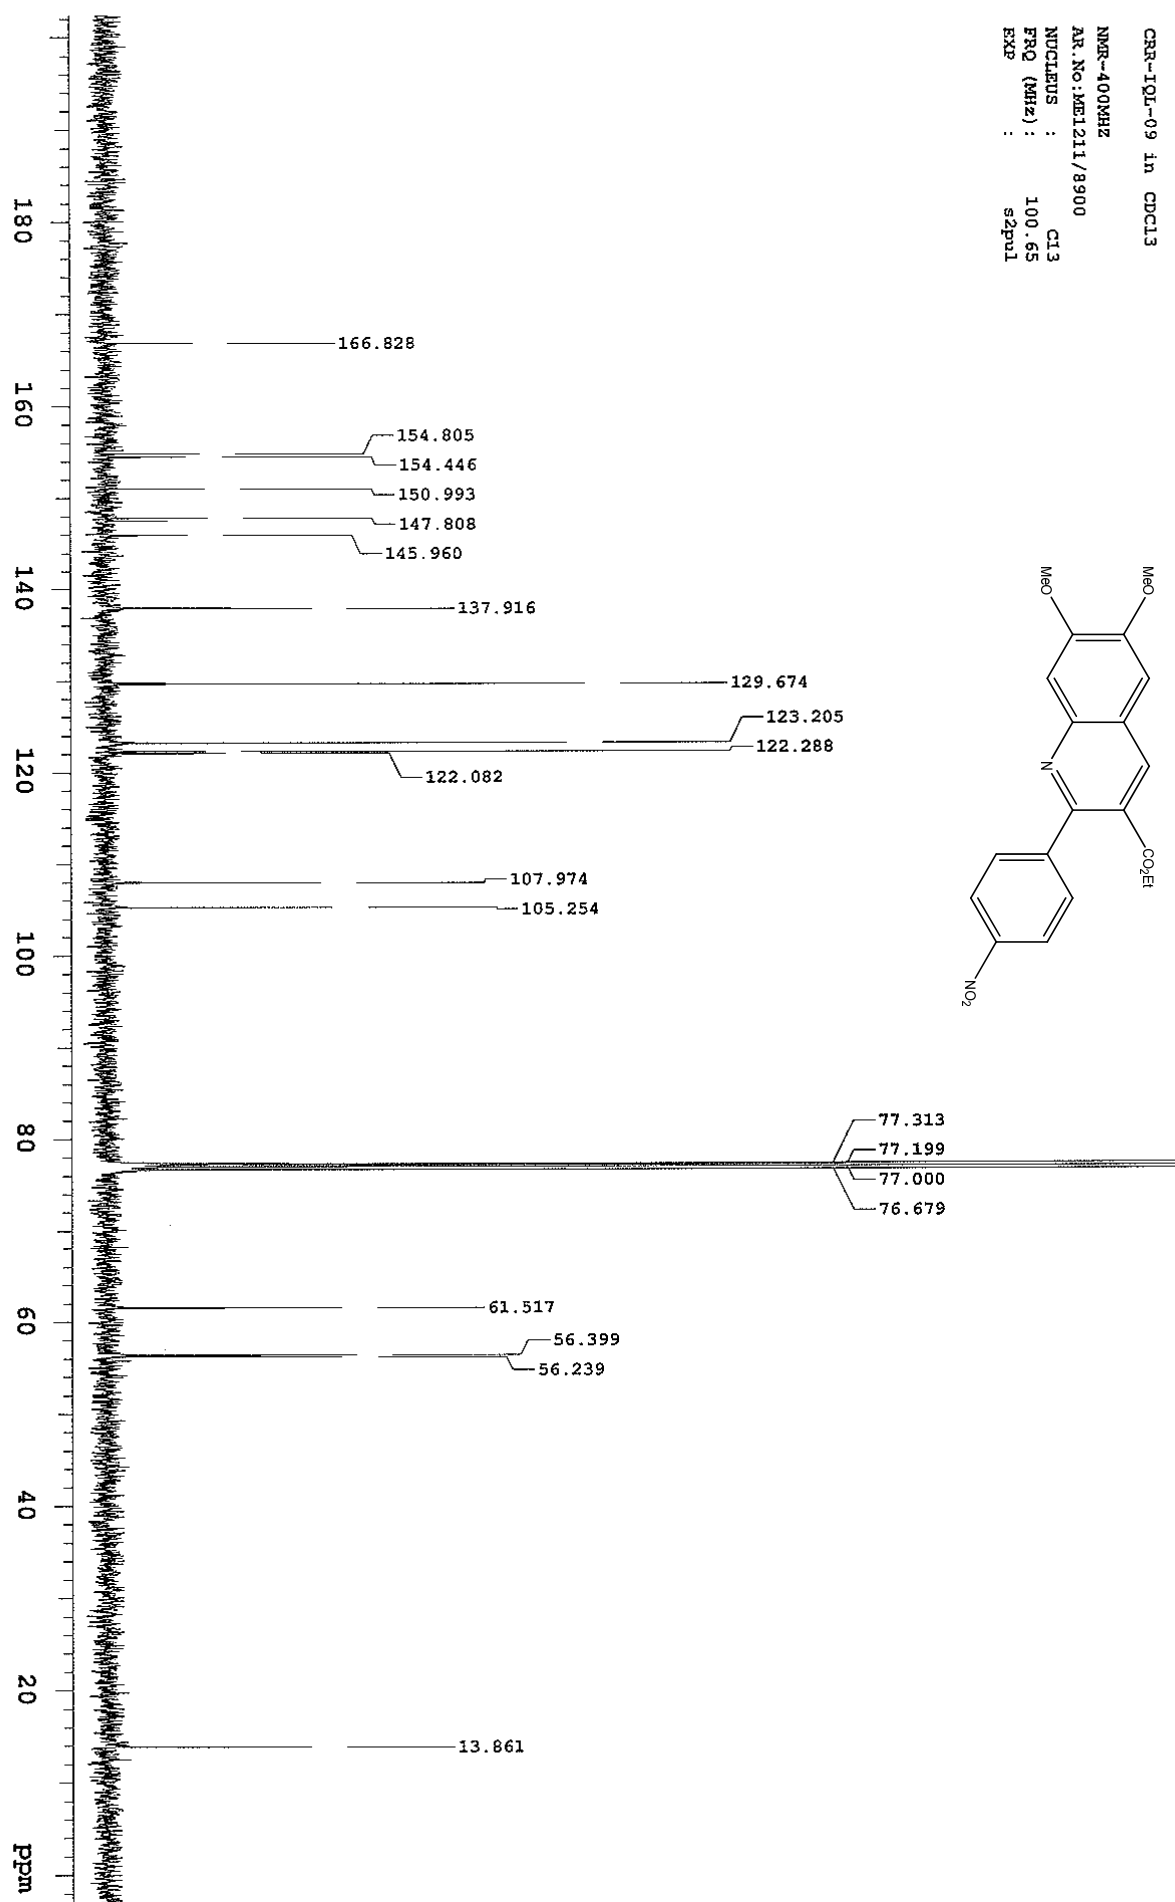

Elemental Composition Report

Single Mass Analysis

Tolerance = 5.0 PPM / DBE: min = -2.0, max = 80.0

Element prediction: Off

Number of isotope peaks used for i-FIT = 4

Monoisotopic Mass, Even Electron Ions

27 formula(e) evaluated with 1 results within limits (up to 10 best isotopic matches for each mass)

Elements Used:

C: 0-25 H: 0-25 N: 0-2 O: 0-6

CRR/QLU09

UT1111\_93 18 (0.416) Cm (18:20-(5+1.4)x0.010)

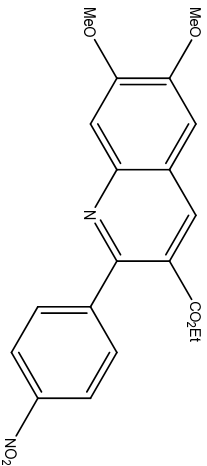

1: TOF MS ES+  
1.77e+004

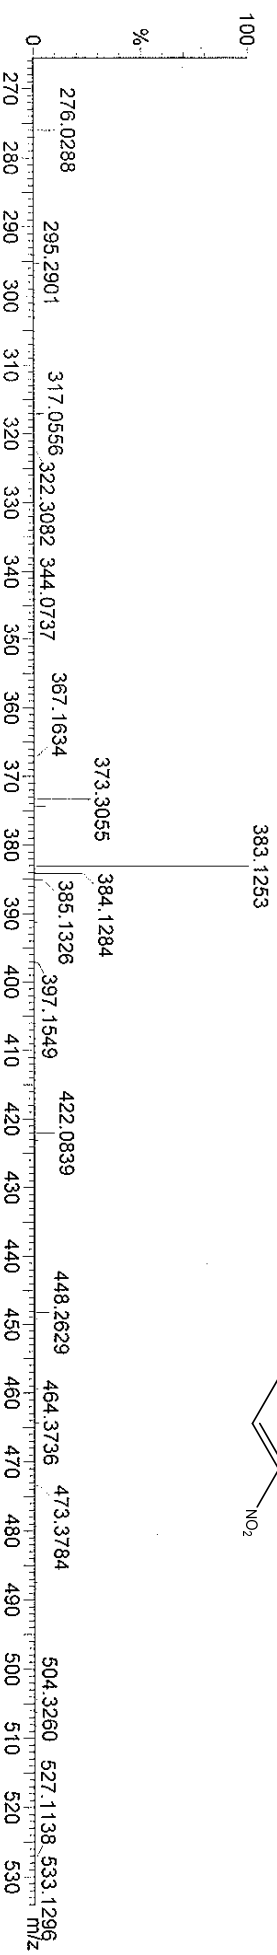

|          |            |     |     |      |               |
|----------|------------|-----|-----|------|---------------|
| Minimum: |            |     |     |      |               |
| Maximum: |            |     |     |      |               |
| Mass     | Calc. Mass | mDa | PPM | DBE  | i-FIT         |
| 383.1253 | 383.1243   | 1.0 | 2.6 | 12.5 | 3.9           |
|          |            |     |     |      | Formula       |
|          |            |     |     |      | C20 H19 N2 O6 |

CRR-101-02 in CDCl3  
NMR-400MHz

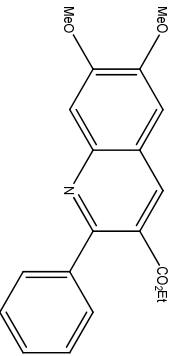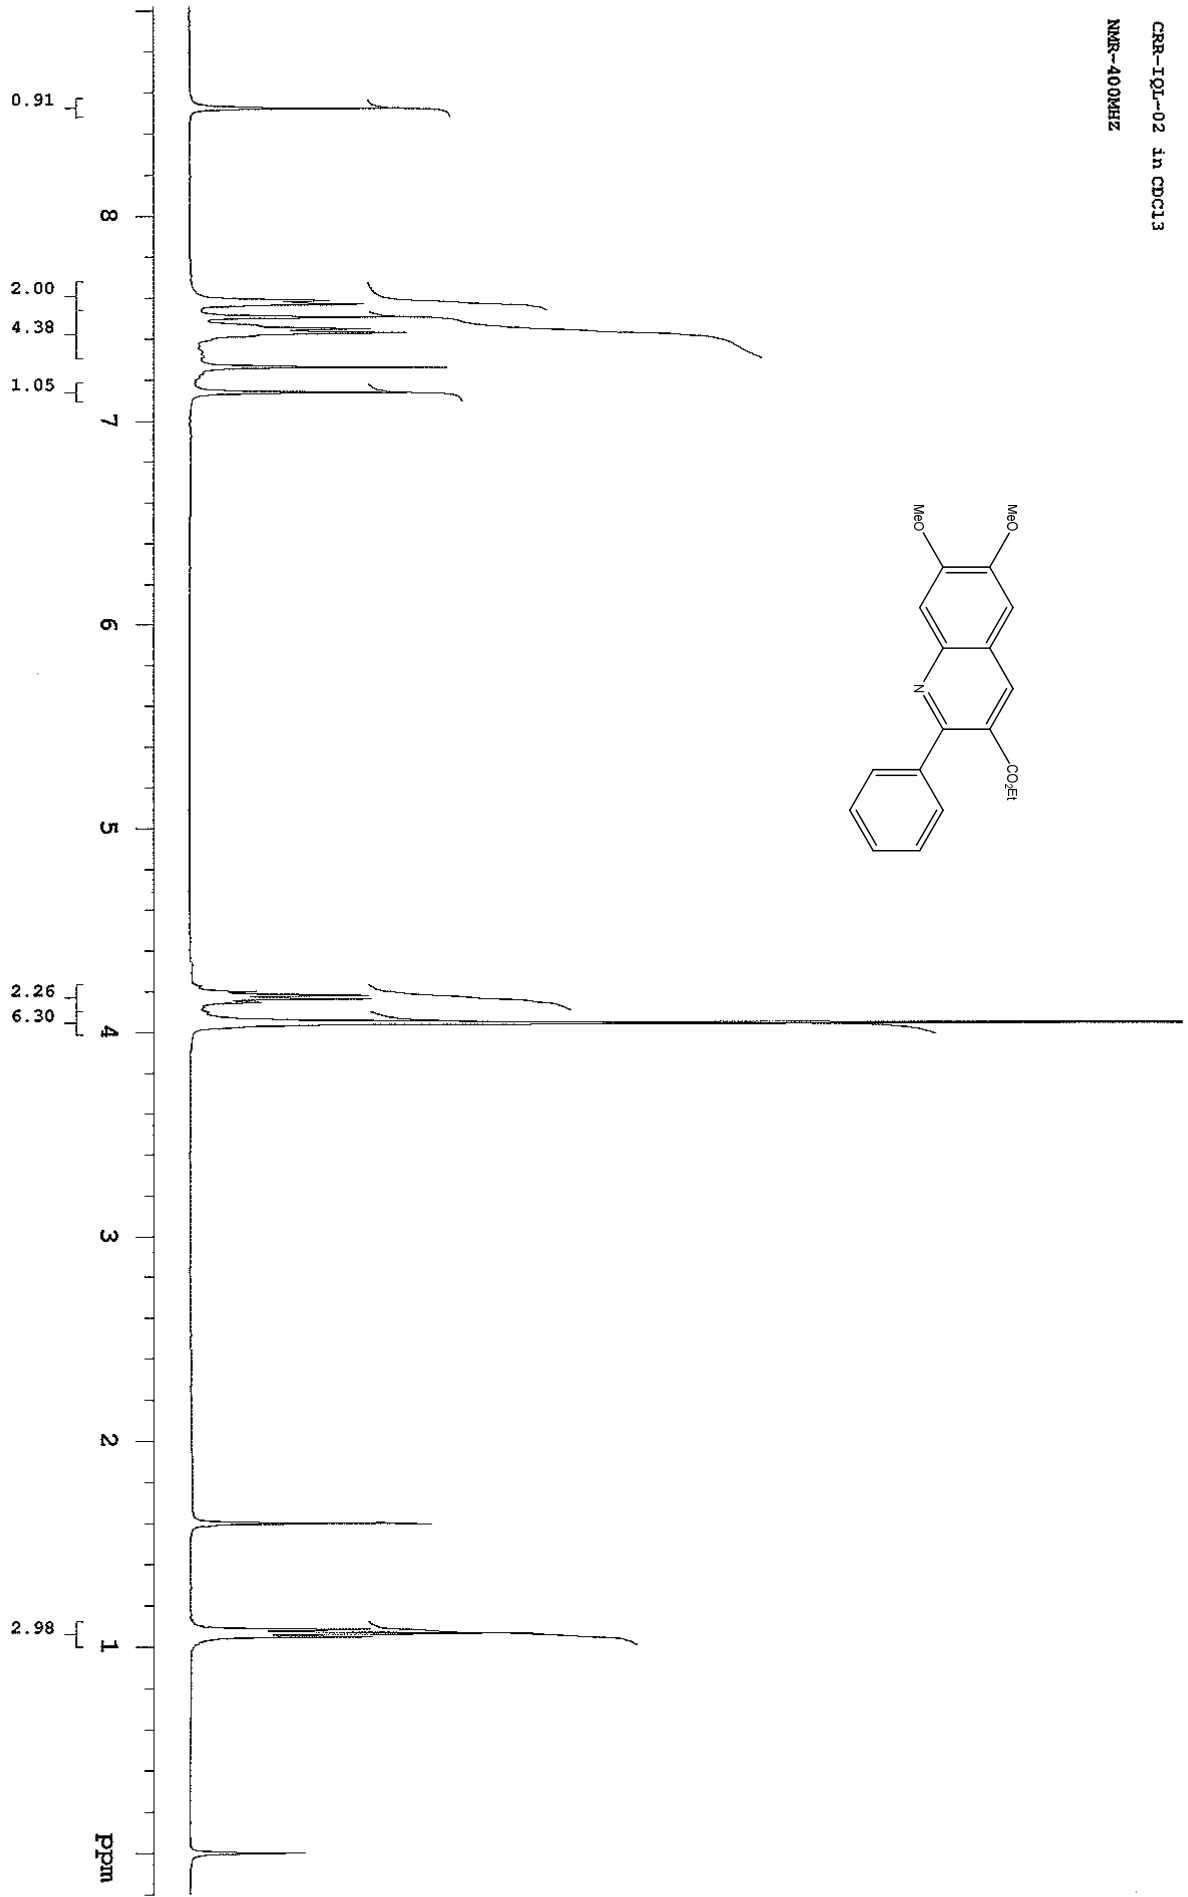

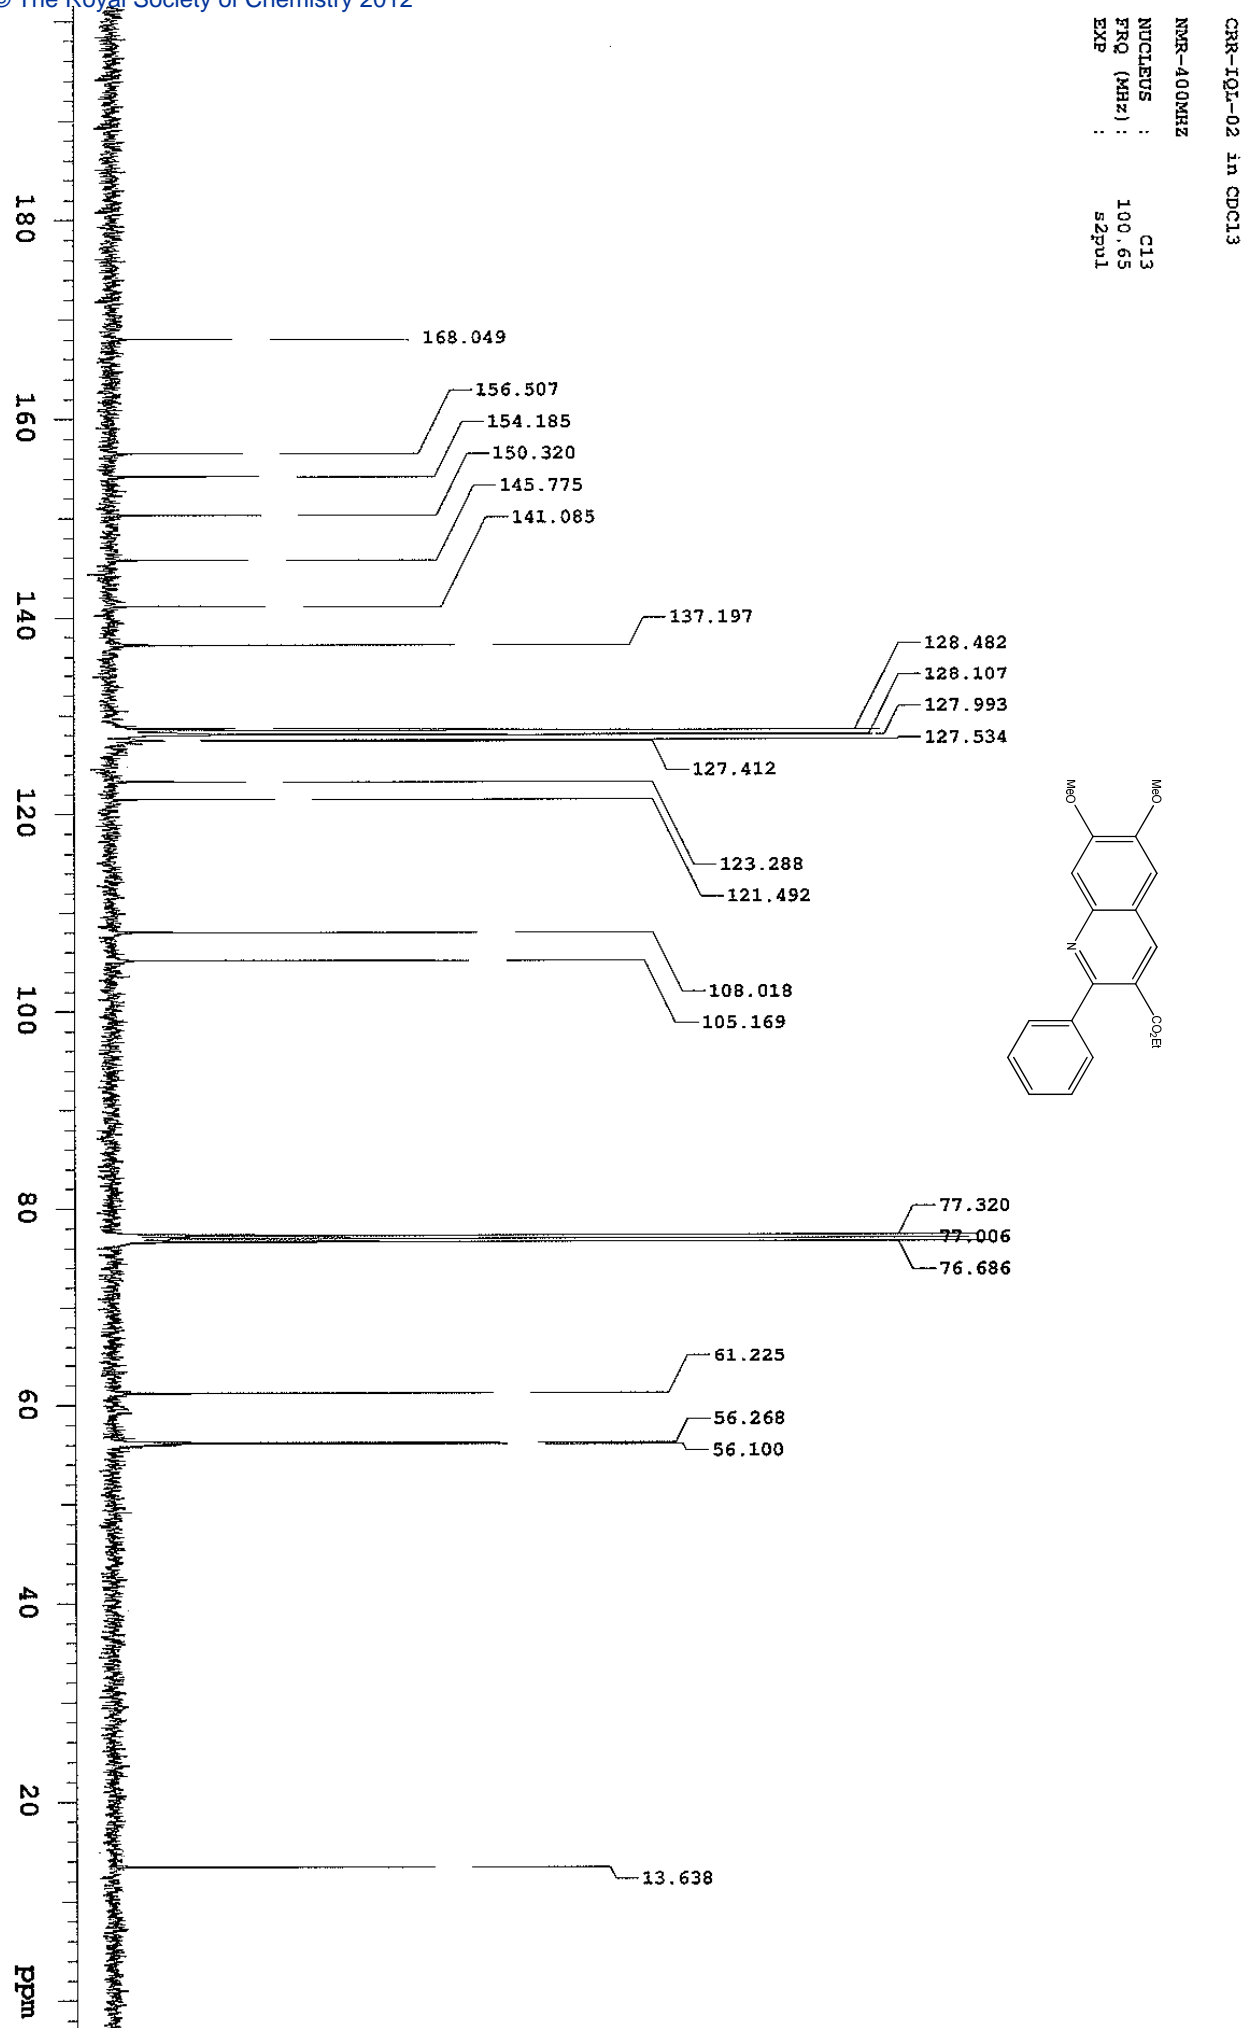

# Elemental Composition Report

### Single Mass Analysis

Tolerance = 5.0 PPM / DBE: min = 0.0, max = 80.0

Element prediction: Off

Number of isotope peaks used for i-FIT = 4

### Monoisotopic Mass, Even Electron Ions

166 formula(e) evaluated with 2 results within limits (up to 4 best isotopic matches for each mass)

Elements Used:

C: 0-30 H: 0-35 N: 0-2 O: 0-5 F: 0-2

CRF-10L/02

UT1011\_57 29 (0.670) Cm (29:36-68:80x0.010)

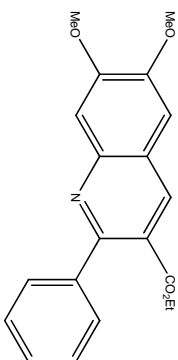

1: TOF MS ES+  
4.76e+004

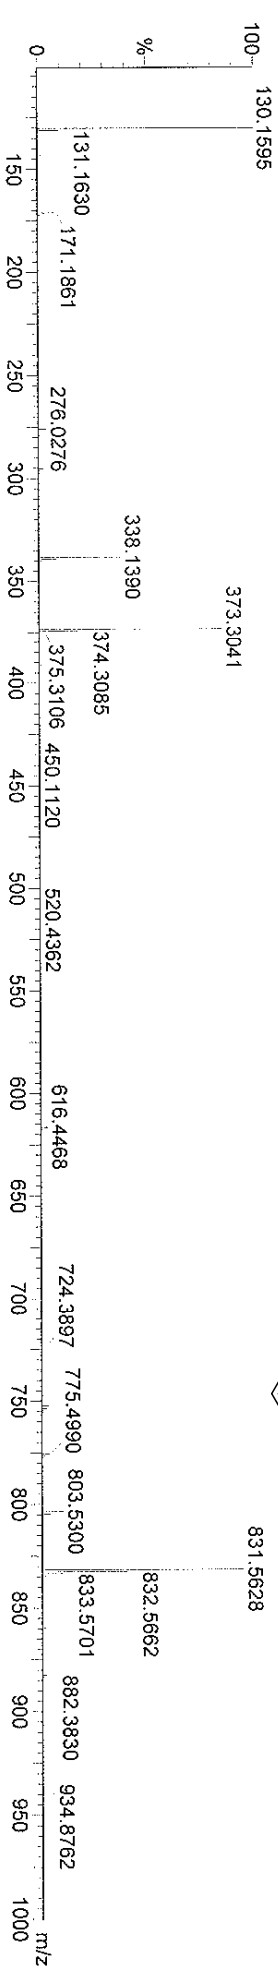

|          |            |      |      |      |       |              |  |   |
|----------|------------|------|------|------|-------|--------------|--|---|
| Minimum: |            |      | 5.0  | 5.0  | 0.0   |              |  |   |
| Maximum: |            |      | 5.0  | 5.0  | 80.0  |              |  |   |
| Mass     | Calc. Mass | mDa  | PPM  | DBE  | i-FTT | Formula      |  |   |
| 338.1390 | 338.1392   | -0.2 | -0.6 | 11.5 | 3.7   | C20 H20 N O4 |  |   |
|          | 338.1404   | -1.4 | -4.1 | 7.5  | 37.7  | C17 H21 N O5 |  | F |

CRR-10L-12 in CDCl<sub>3</sub>  
NMR-400MHz

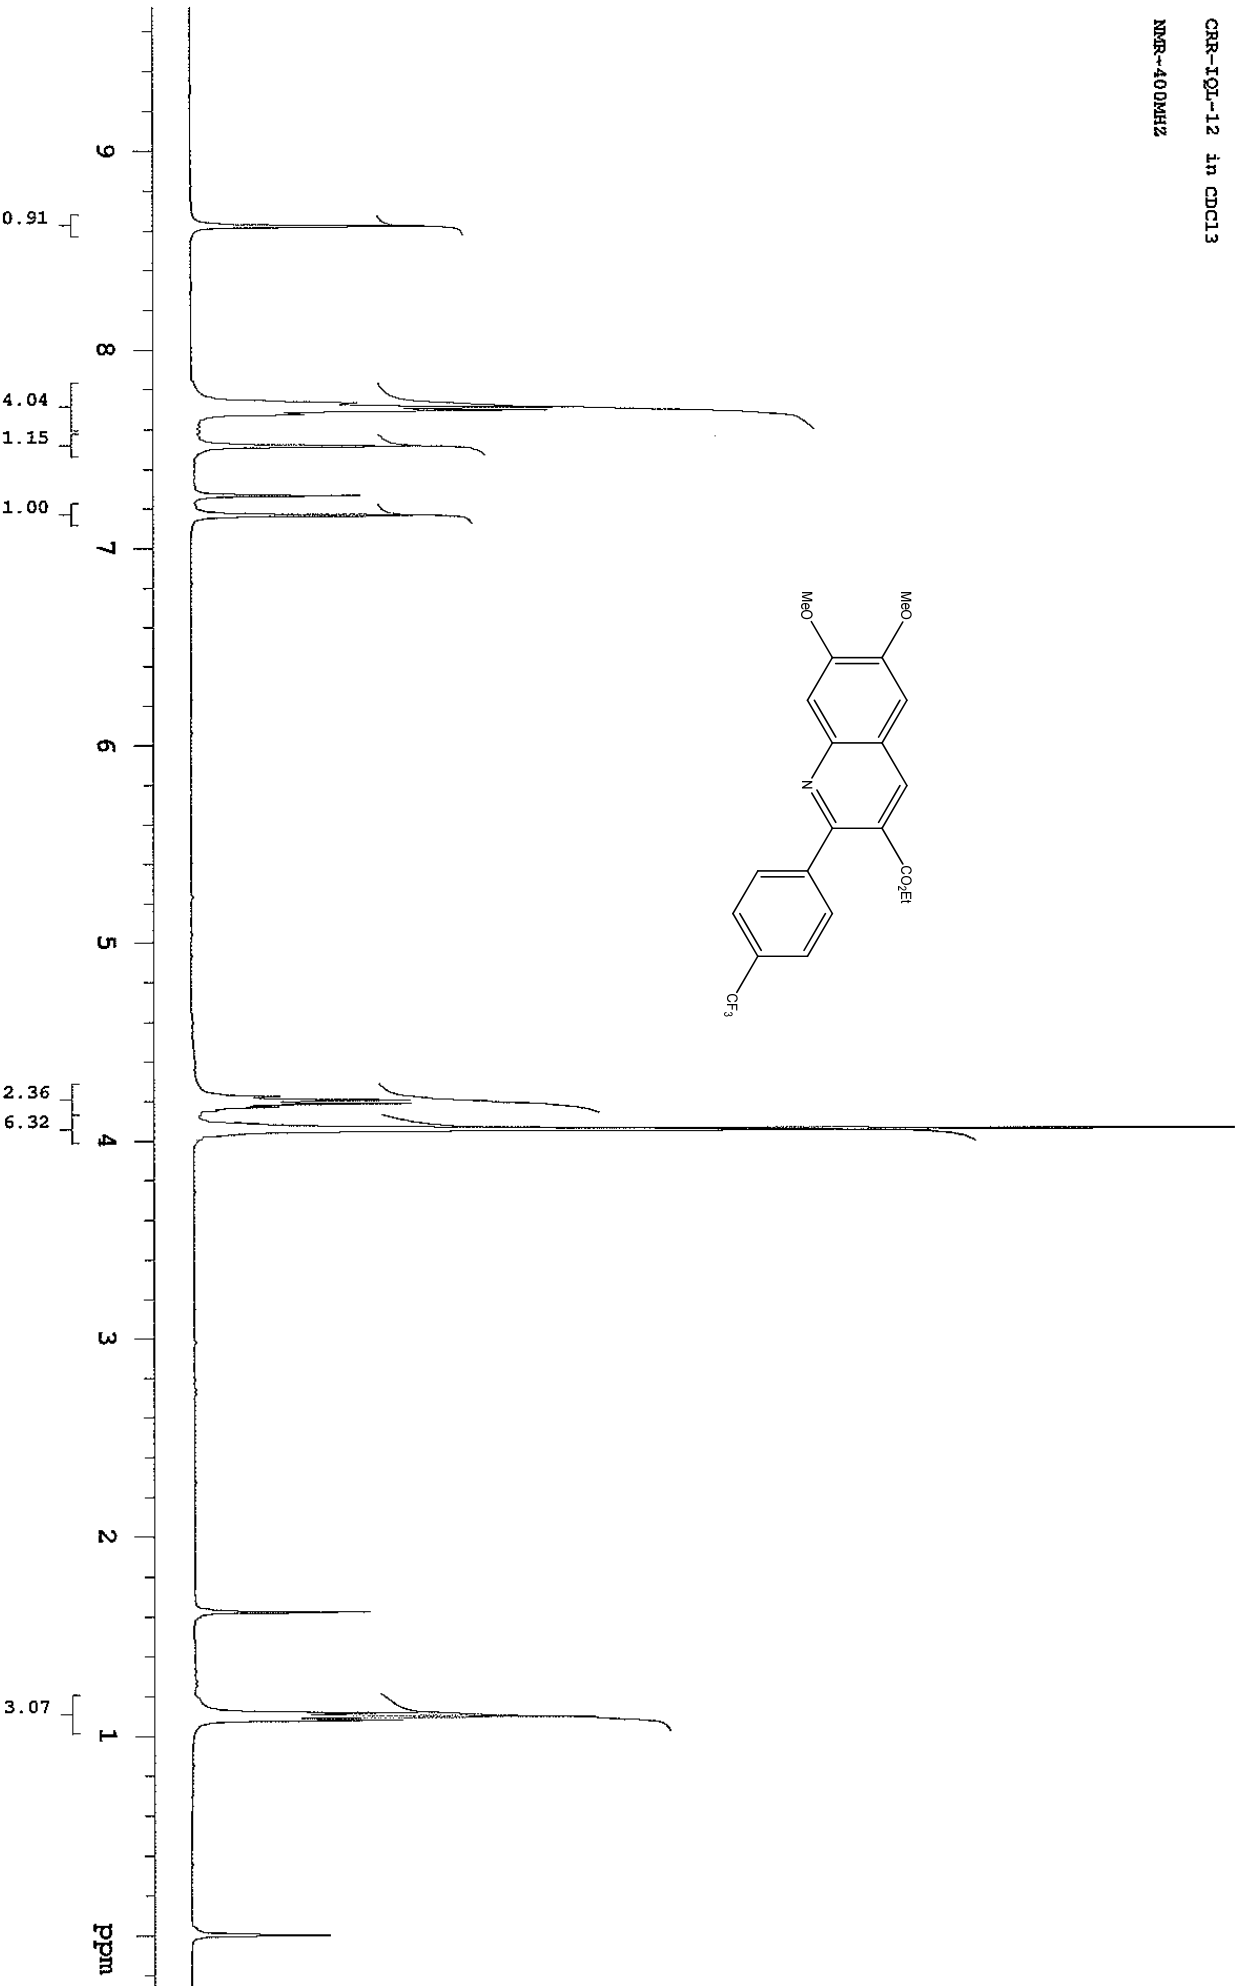

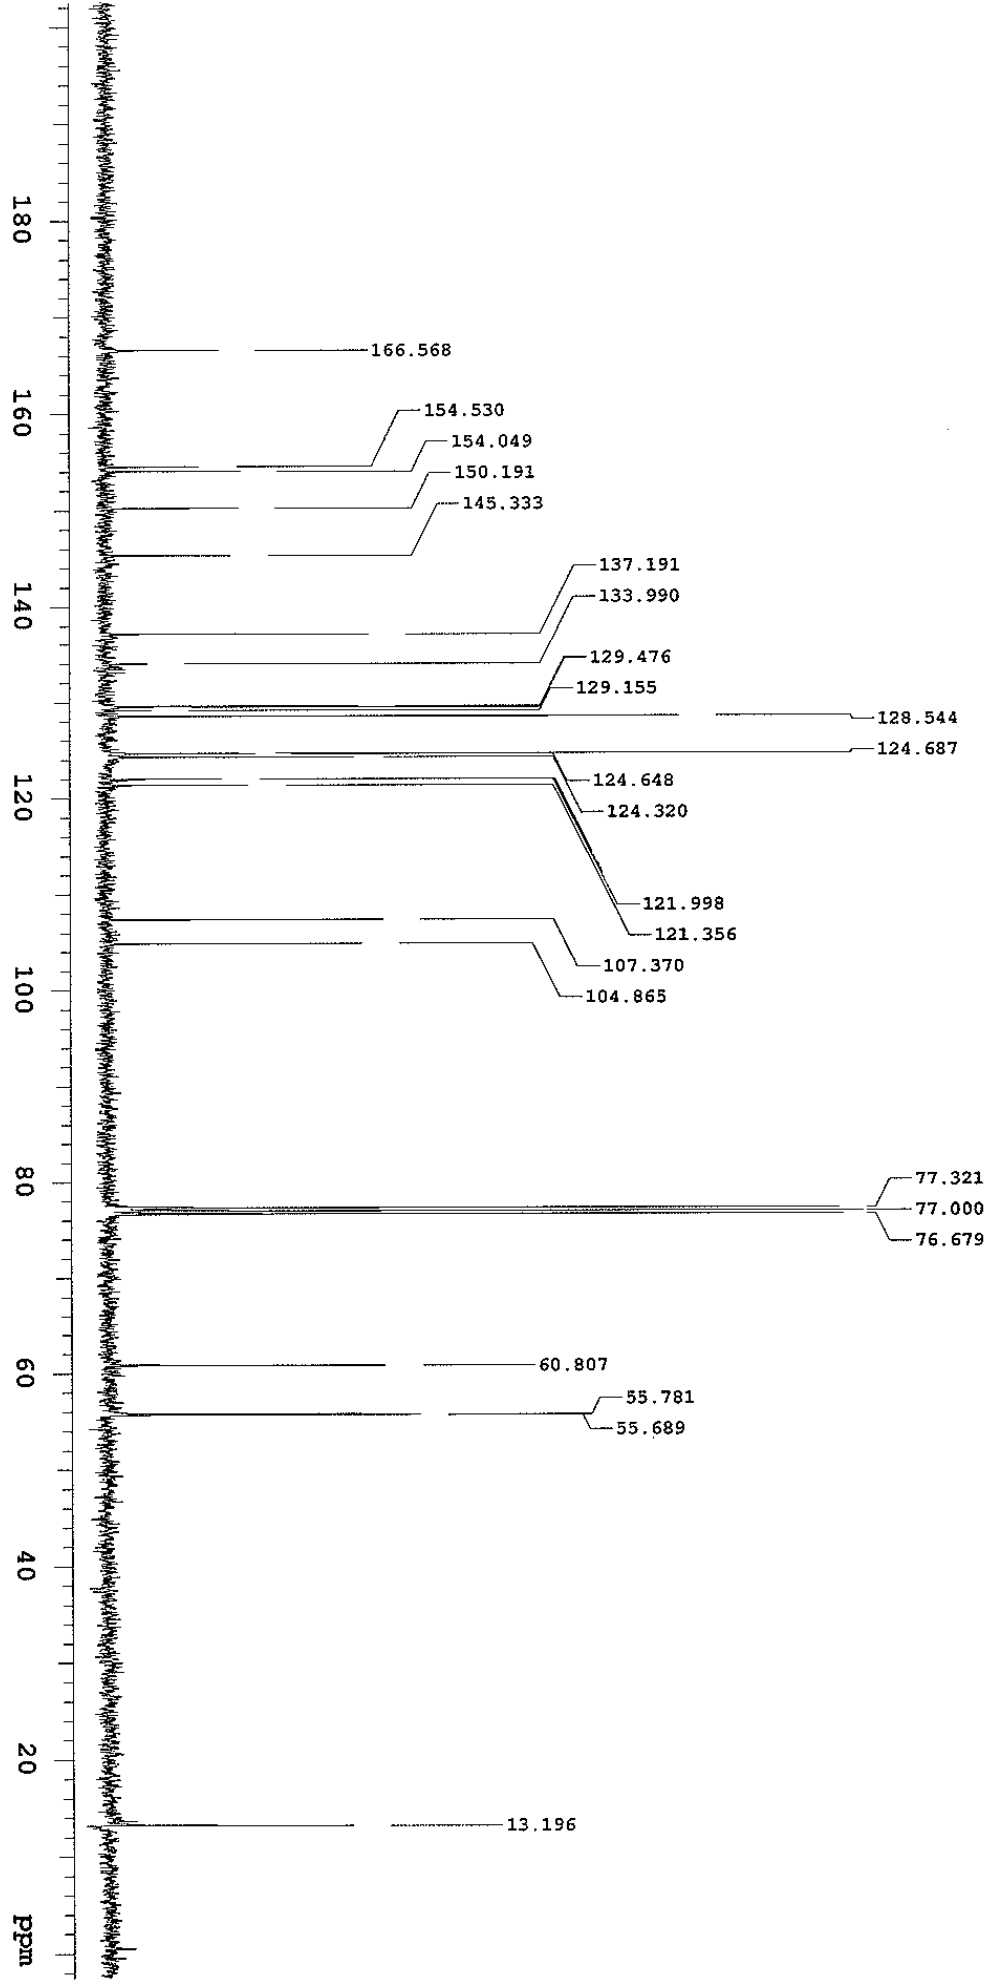

CRR-101-12 in CDCl3  
NMR-400MHZ  
NUCLEUS : C13  
FREQ (MHz) : 100.65  
EXP : s2pu1

Tolerance = 8.0 PPM / DBE: min = -2.0, max = 80.0

Number of isotope peaks used for i-FIT = 2

**Monoisotopic Mass, Even Electron Ions**  
5 formula(e) evaluated with 1 results within limits (up to 5 best isotopic matches for each mass)

**Elements Used:**

C: 0-25    H: 0-20    N: 0-2    O: 0-5    F: 0-3

CRR-1Q1-12

UT1112\_34 23 (0.426) Cm (21:23-35:68x0.010)

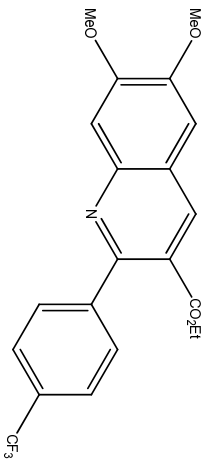1: TOF MS ES+  
5.74e+003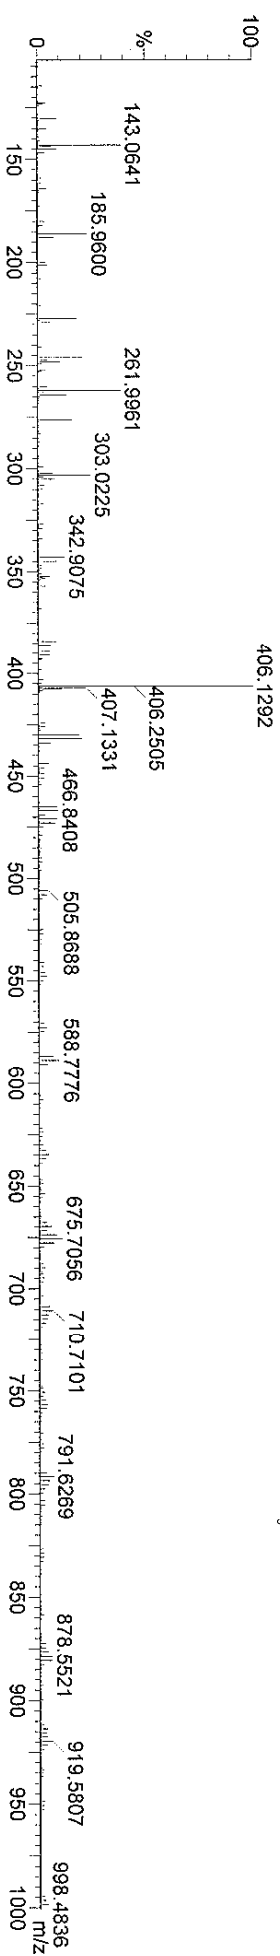

|          |       |          |     |      |      |       |                 |
|----------|-------|----------|-----|------|------|-------|-----------------|
| Minimum: |       |          |     | -2.0 |      |       |                 |
| Maximum: |       |          | 5.0 | 8.0  | 80.0 |       |                 |
| Mass     | Calc. | Mass     | mDa | PPM  | DBE  | i-FiT | Formula         |
| 406.1292 |       | 406.1266 | 2.6 | 6.4  | 11.5 | 5.1   | C21 H19 N O4 F3 |

CHR-IQT-08 in CDCl3  
NMR-400MHZ

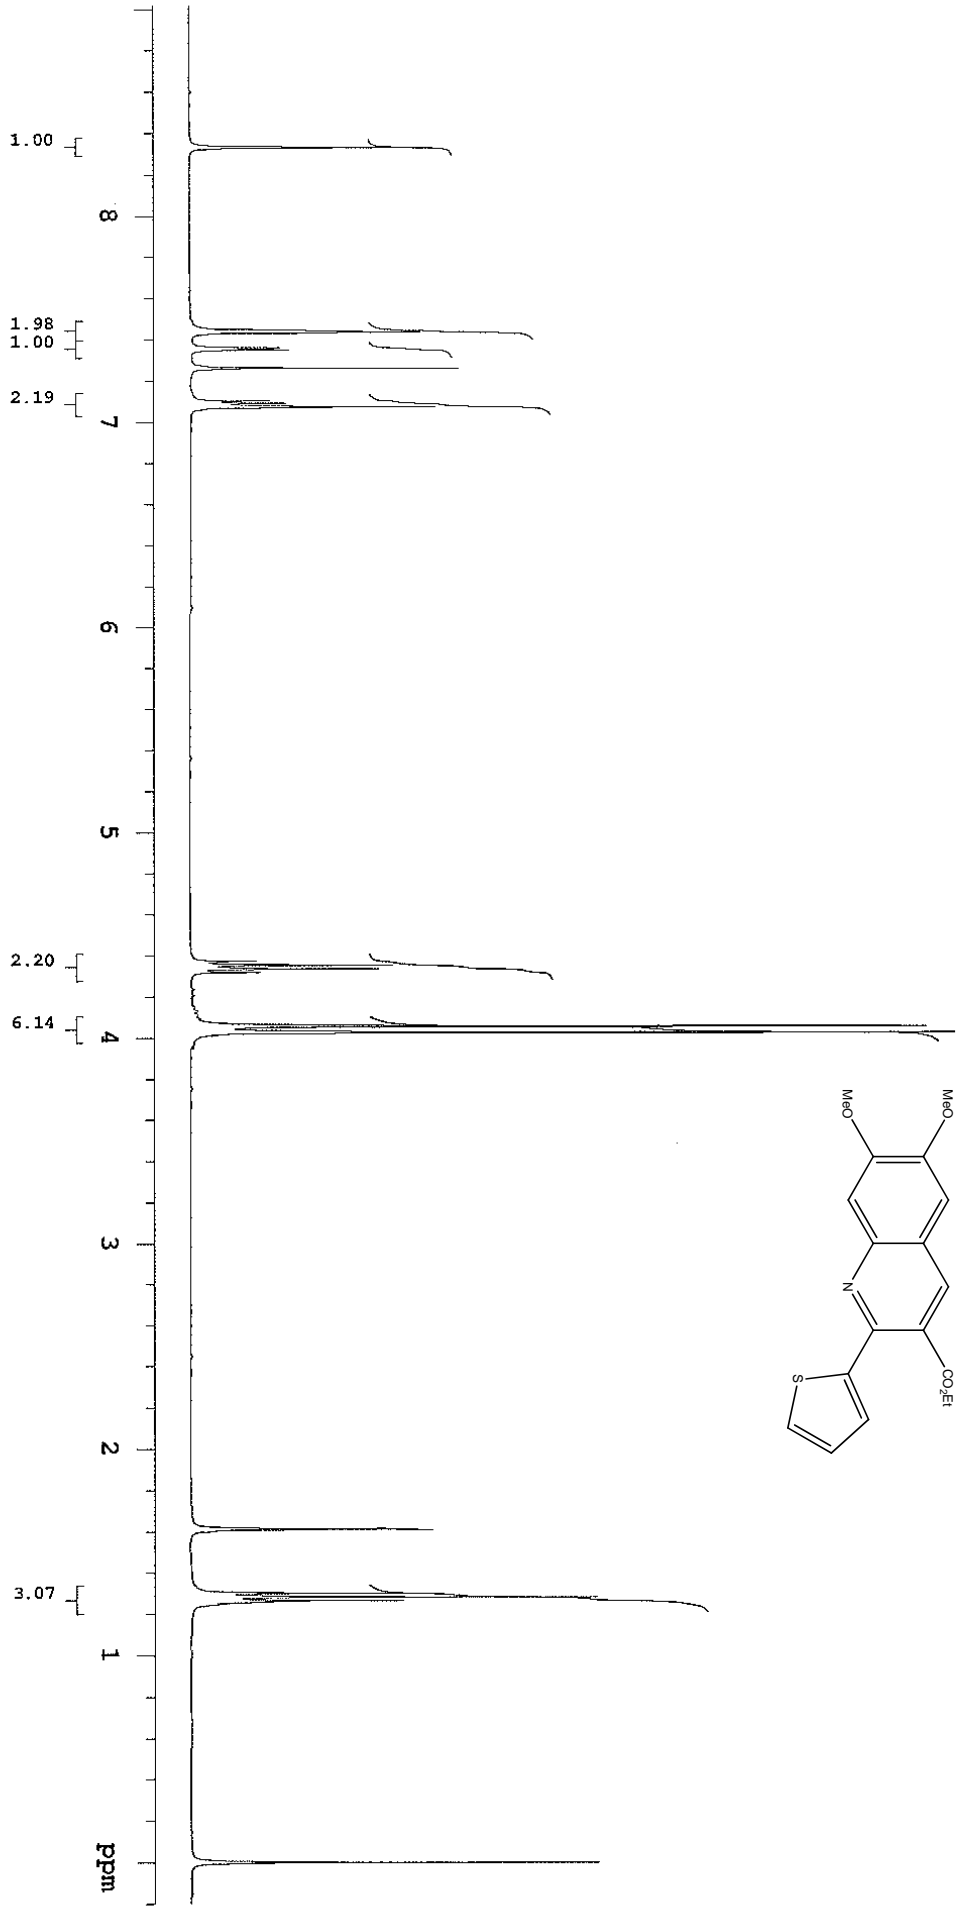

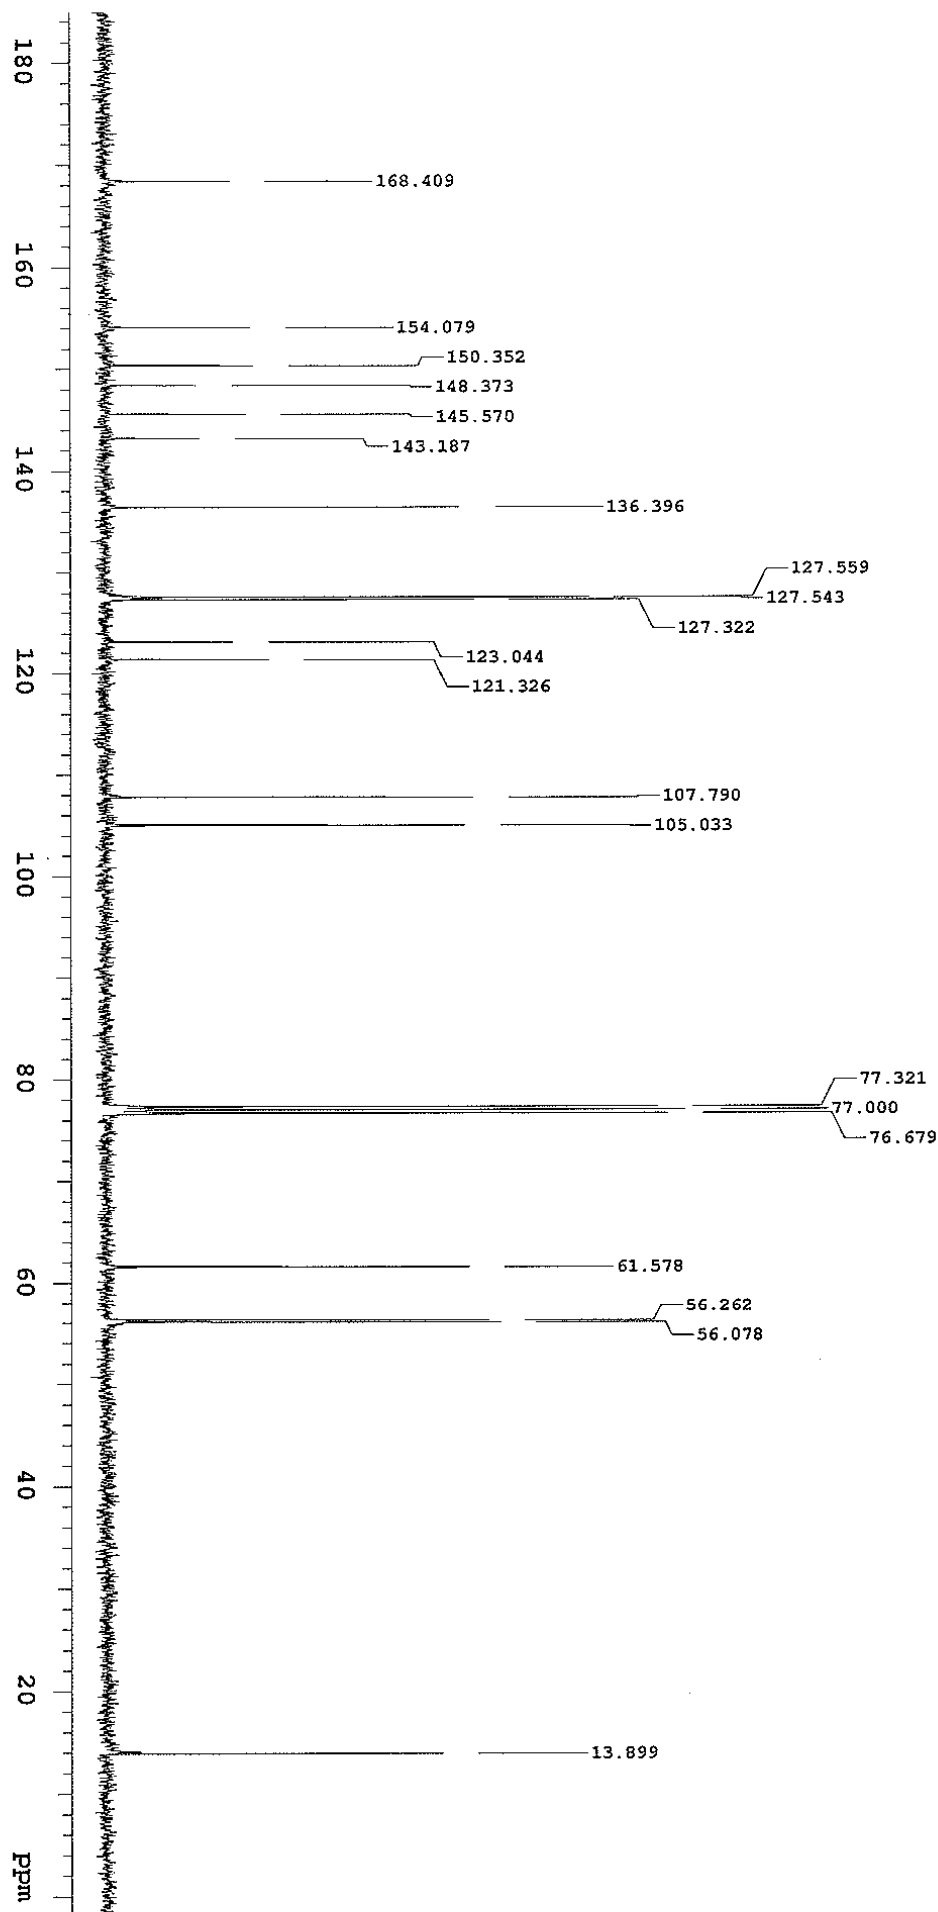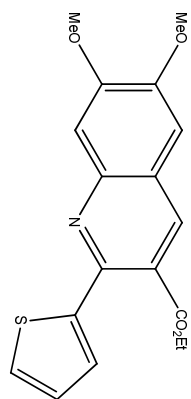

CRR-101-08 in CDCl3  
NMR-400MHZ  
NUCLEUS : C13  
FREQ (MHz) : 100.65  
EXP : s2pu1

Elemental Composition Report

Single Mass Analysis

Tolerance = 5.0 PPM / DBE: min = -2.0, max = 80.0  
Element prediction: Off  
Number of isotope peaks used for i-FIT = 4

Monoisotopic Mass, Even Electron Ions

34 formula(e) evaluated with 1 results within limits (up to 10 best isotopic matches for each mass)

Elements Used:

C: 0-25 H: 0-25 N: 0-1 O: 0-4 S: 0-1

CRR/QL/08

UT1111\_92.22 (0.506) Cm (22:25-1:2x0.010)

1: TOF MS ES+  
1.62e+004

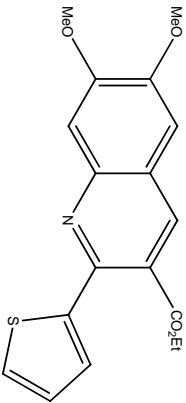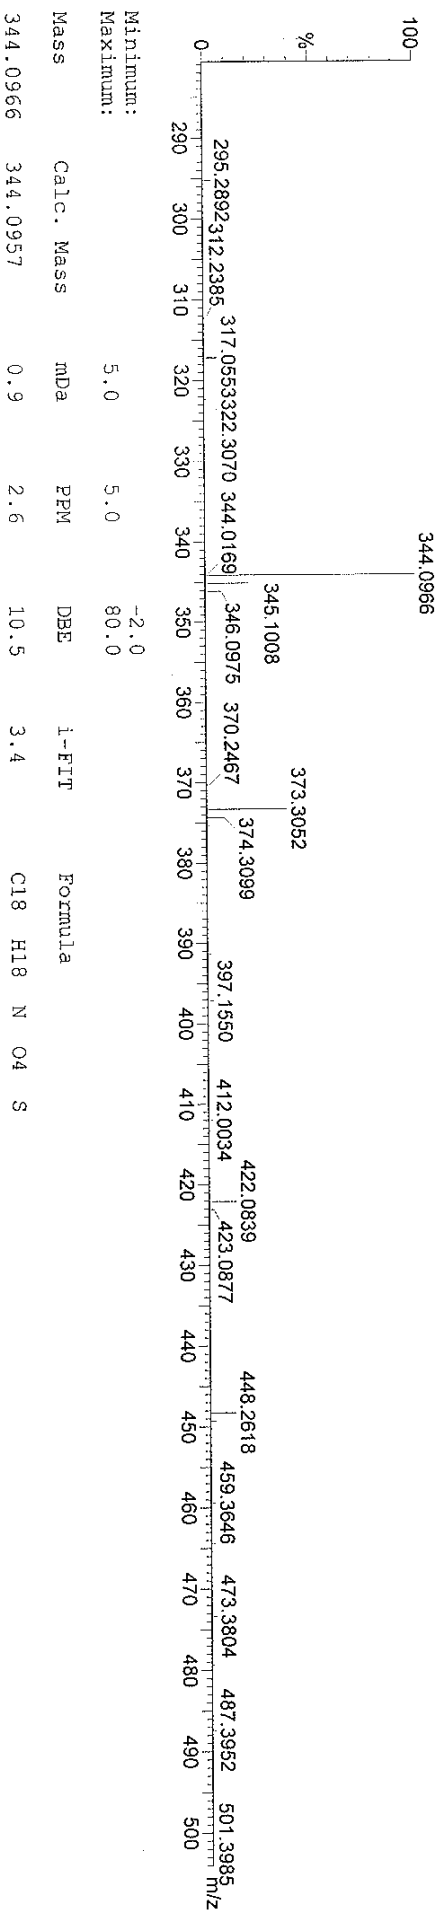

Minimum: 5.0  
Maximum: 5.0  
DBE: -2.0  
Formula: C18 H18 N O4 S

Mass: 344.0966  
Calc. Mass: 344.0957  
mDa: 0.9  
PPM: 2.6  
DBE: 10.5  
i-FIT: 3.4

CRR-IQ1-11 in CDCl<sub>3</sub>  
NMR-400MHZ

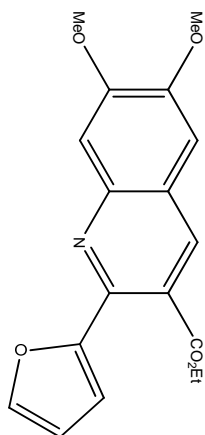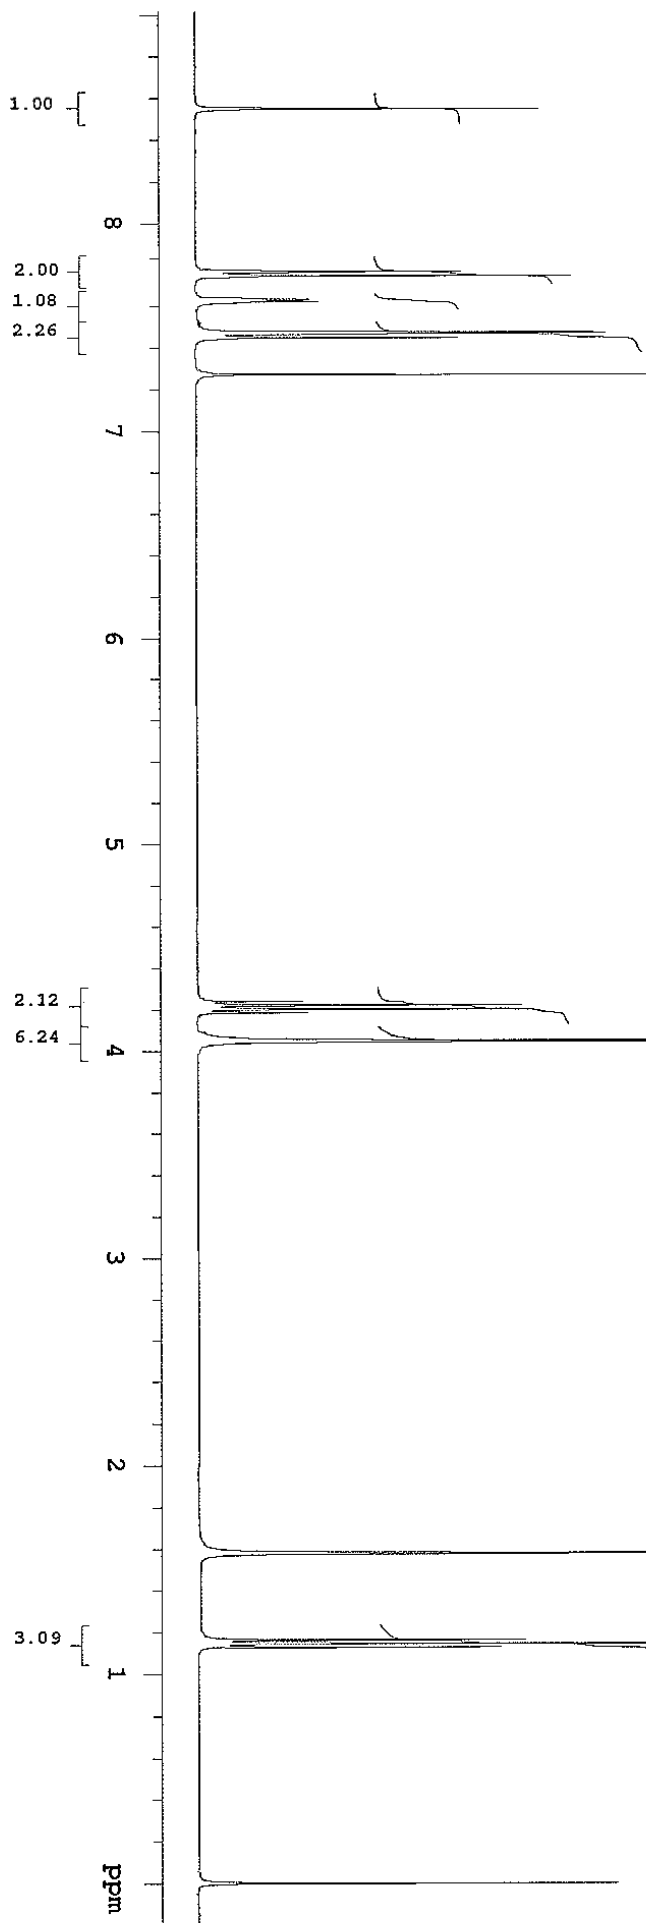

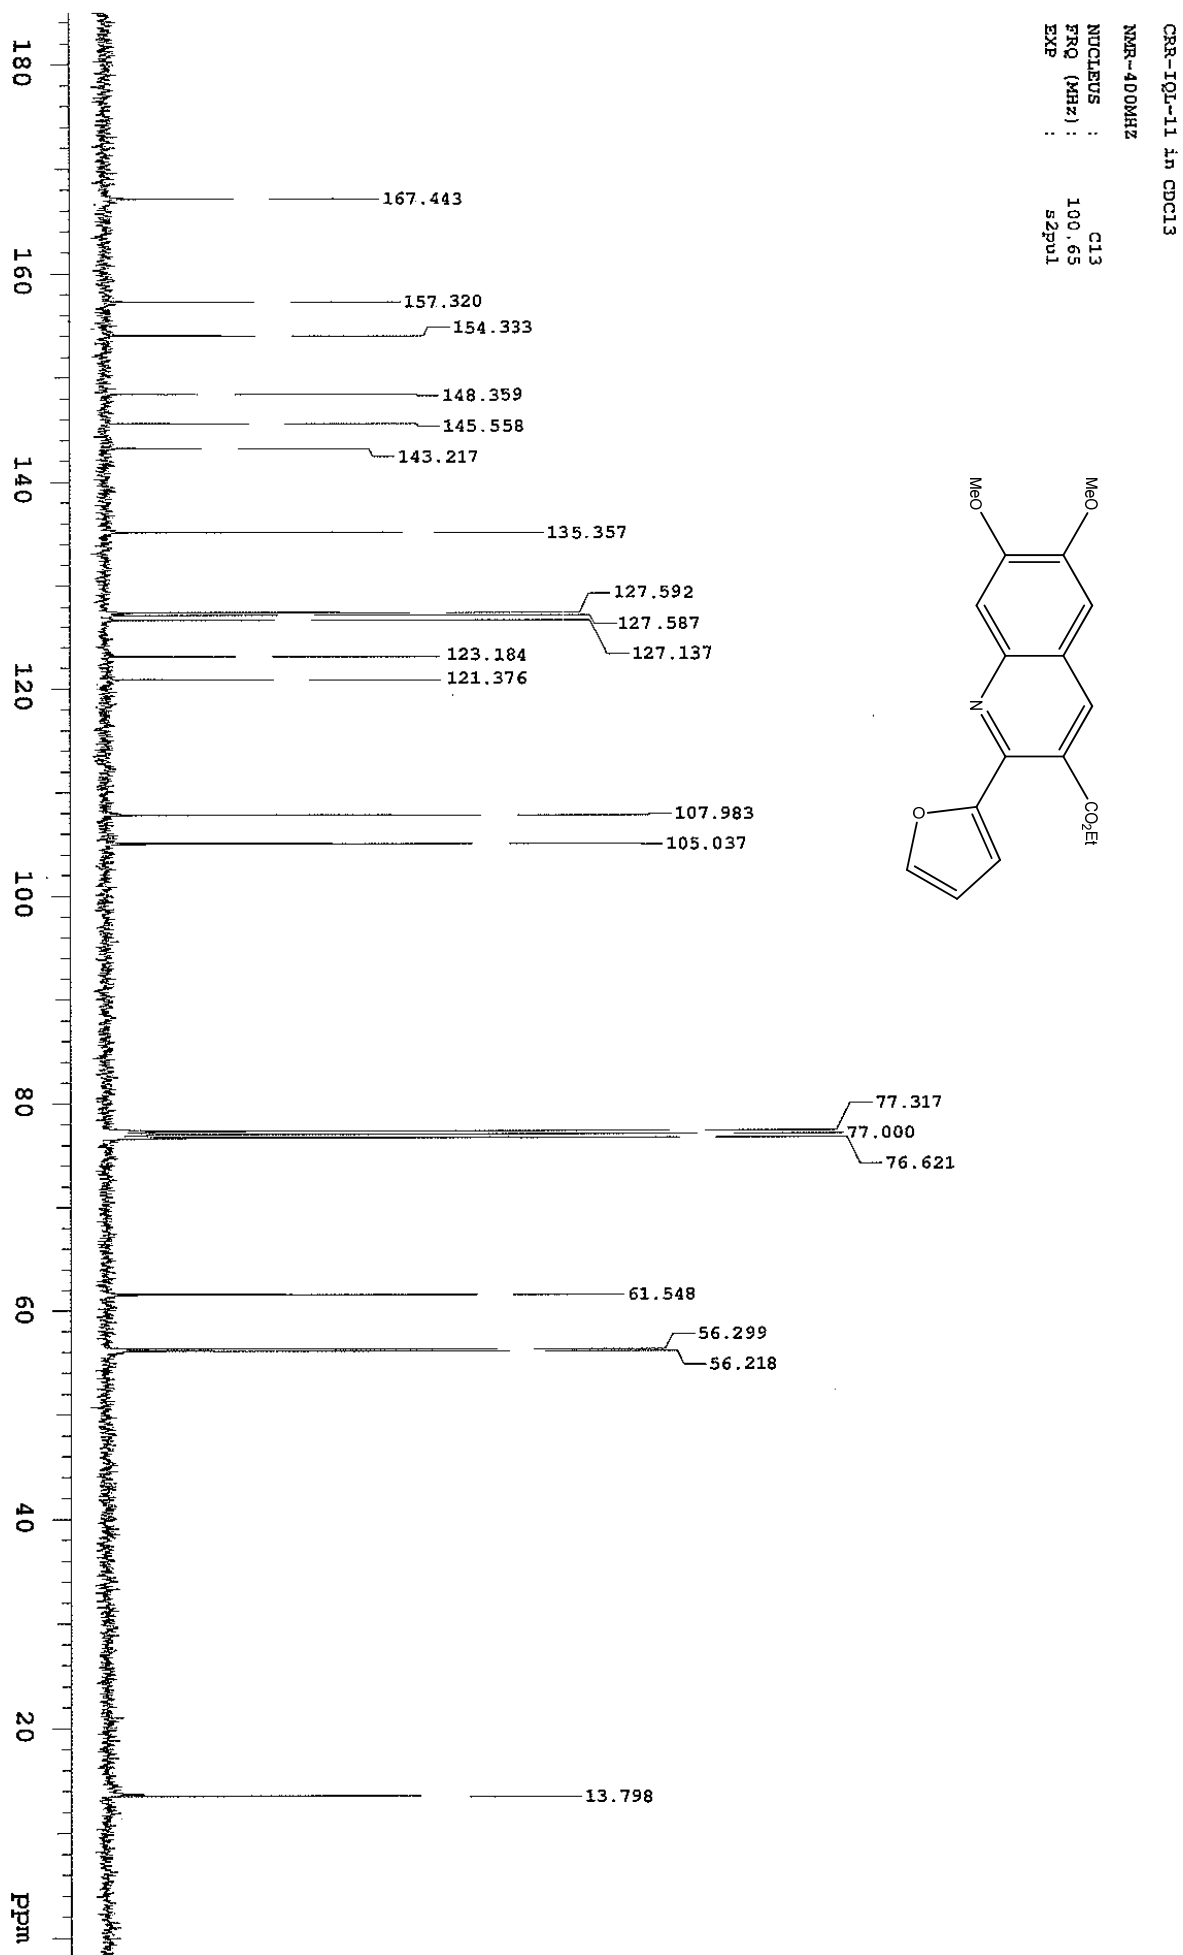

Elemental Composition Report

Single Mass Analysis

Tolerance = 5.0 PPM / DBE: min = -2.0, max = 80.0

Element prediction: Off

Number of isotope peaks used for i-FIT = 4

Monoisotopic Mass, Even Electron Ions

34 formula(e) evaluated with 1 results within limits (up to 10 best isotopic matches for each mass)

Elements Used:

C: 0-25 H: 0-25 N: 0-1 O: 0-5

CRR/QL/11

UT1111\_92.25 (0.580) Cm (22:25-1:2x0.010)

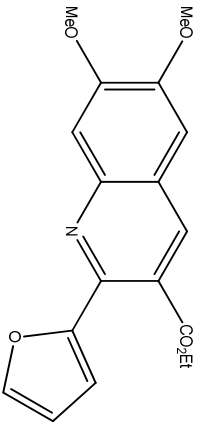

1: TOF MS ES+  
1.55e+004

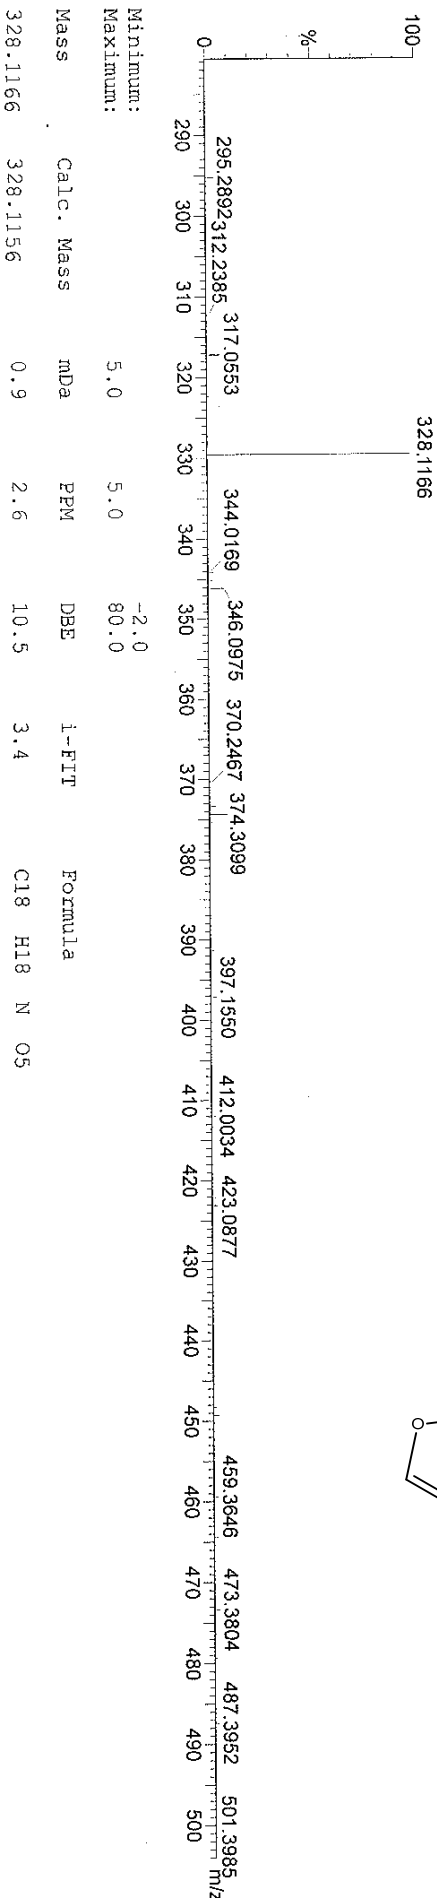

CRR/101/14 in CDCl<sub>3</sub>  
NMR-400MHz  
NUCLEUS : <sup>1</sup>H  
FREQ (MHz) : 400.23  
EXP : s2pul

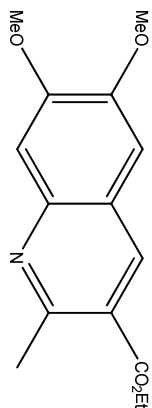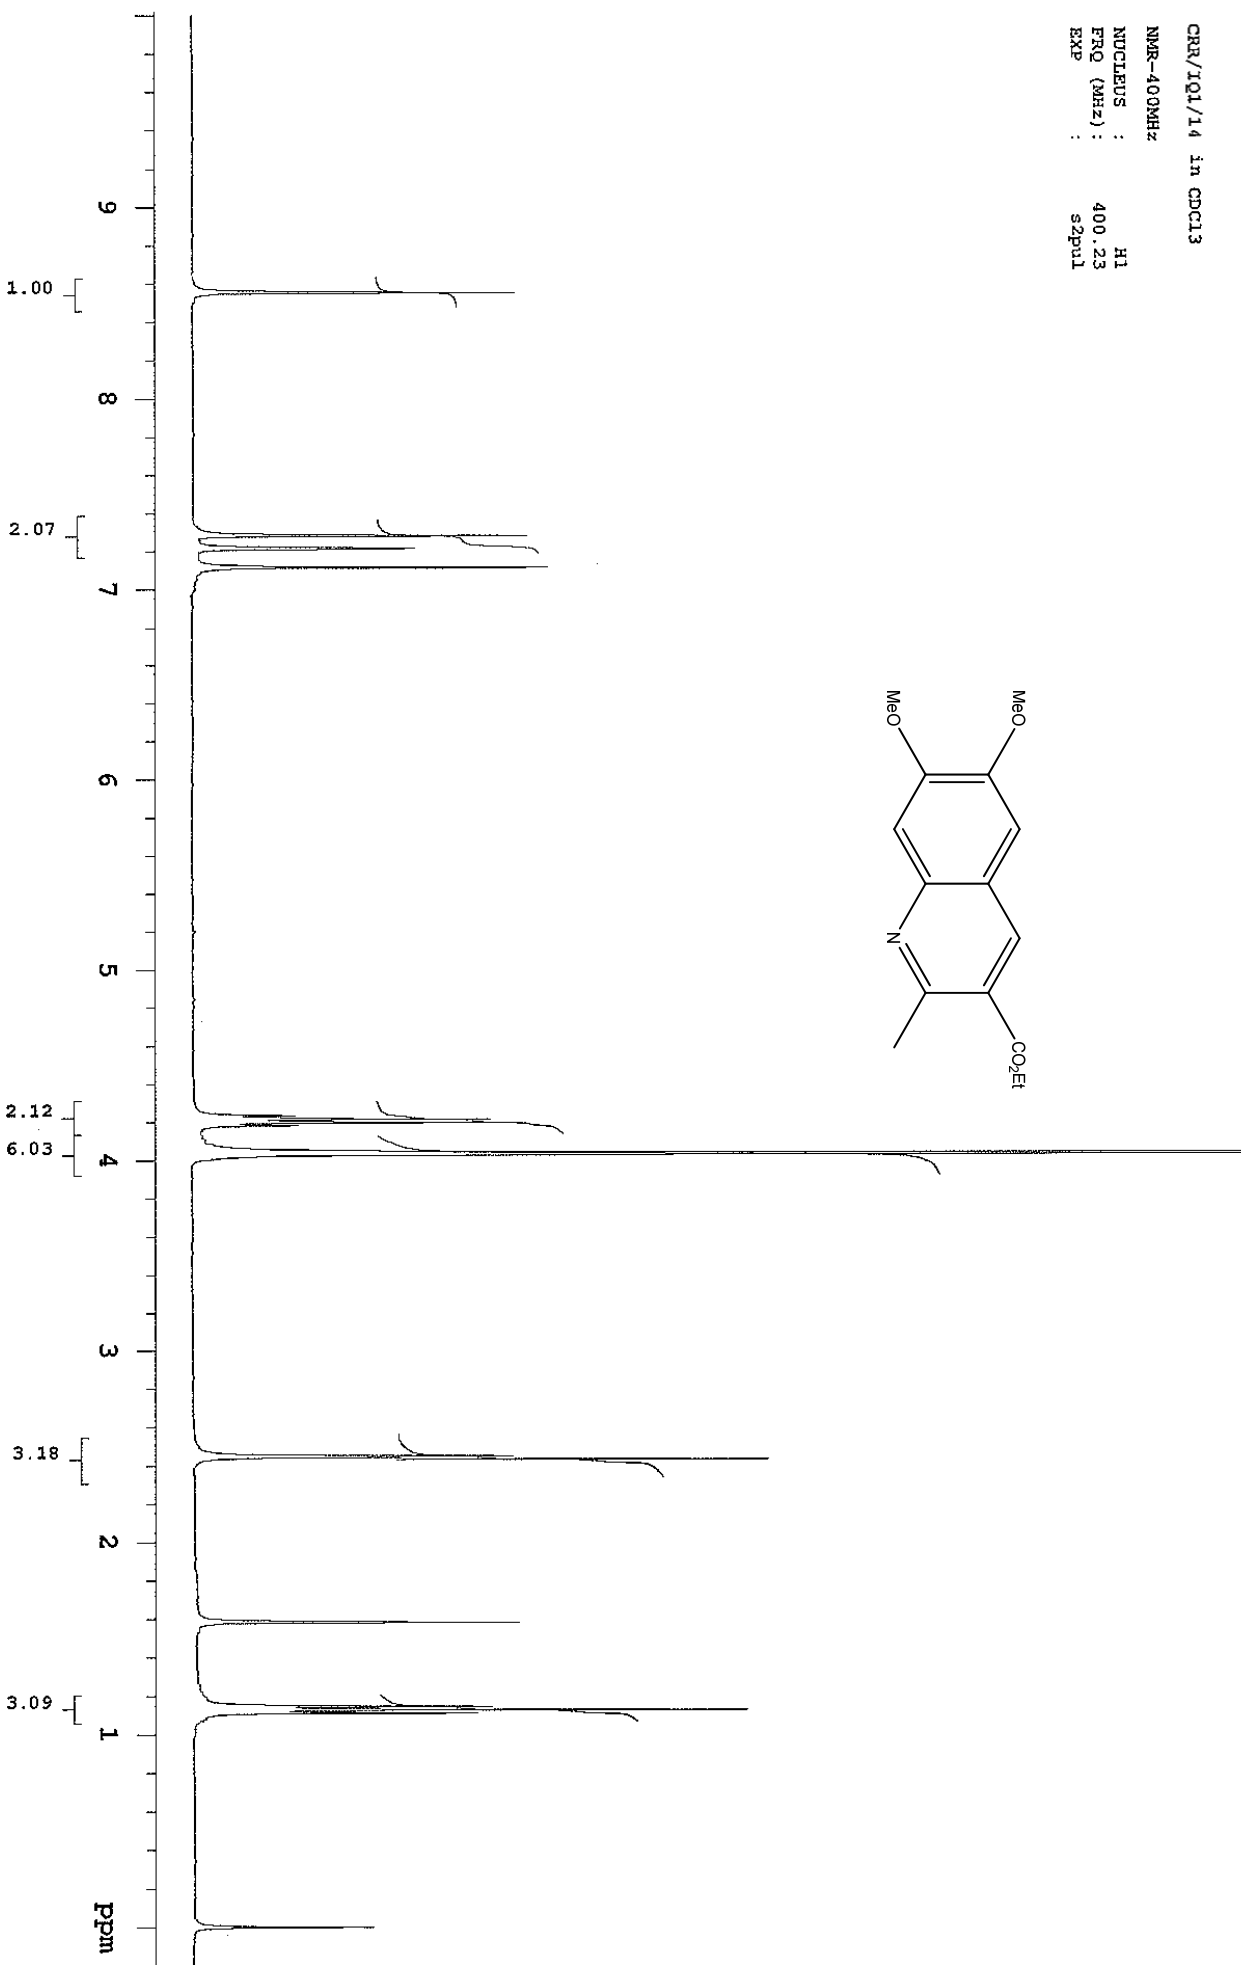

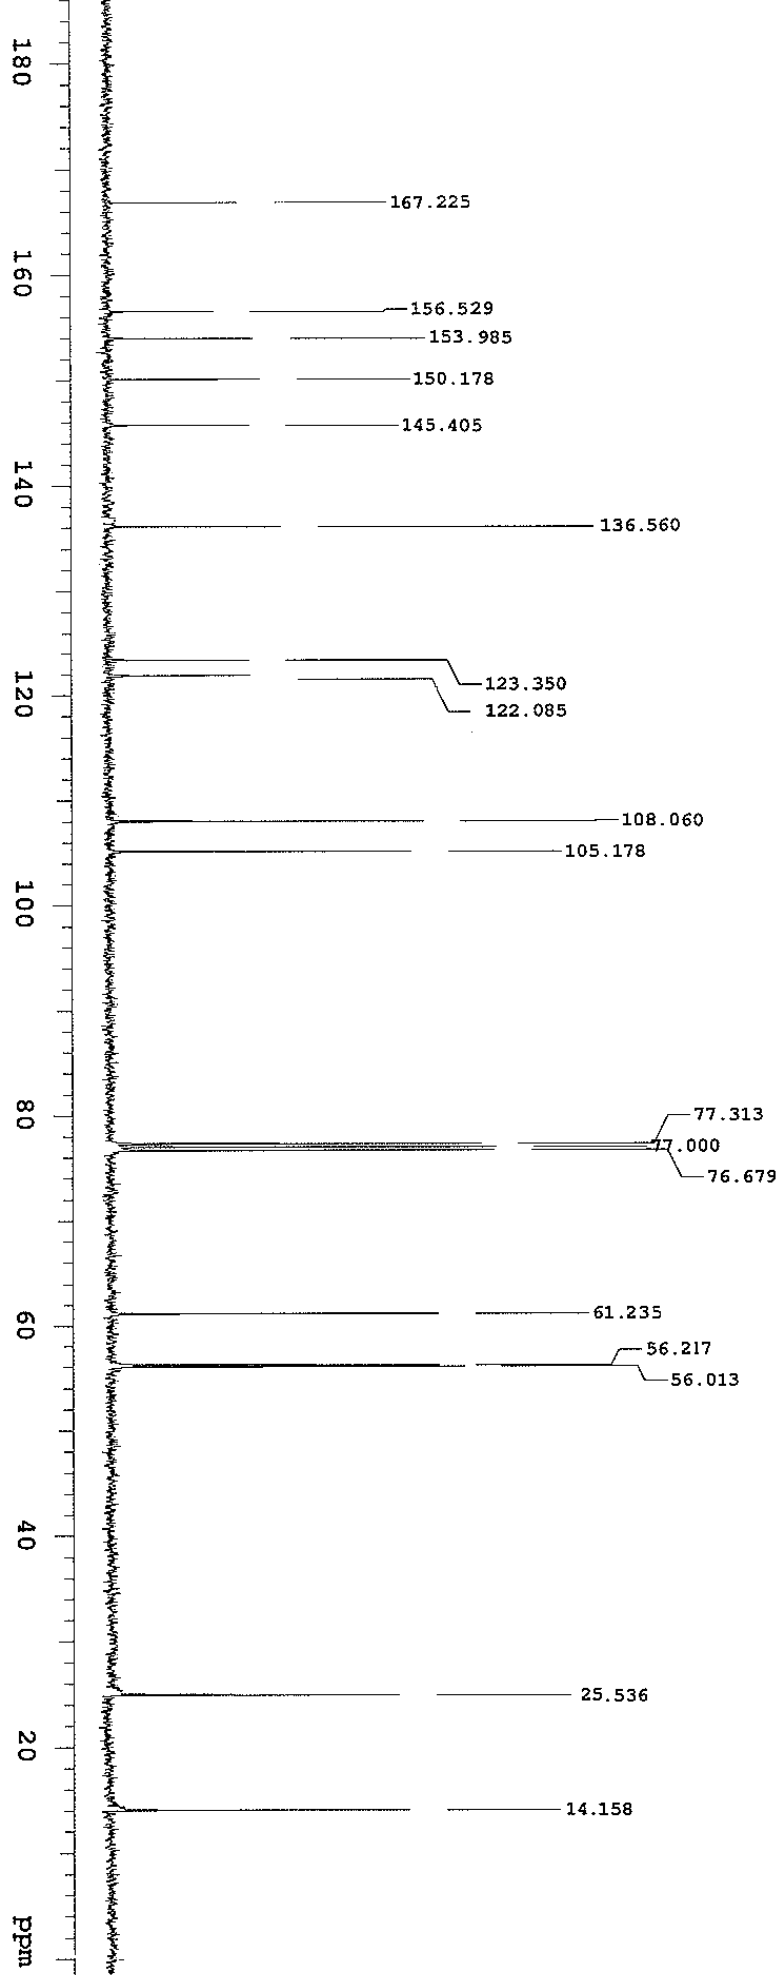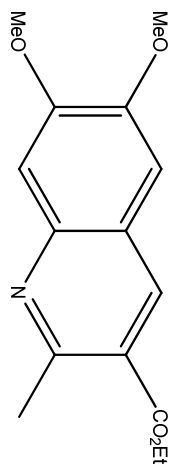

CNR-1Q1-14 in CDCl3  
NMR-400MHZ  
NUCLEUS : C13  
FREQ (MHz) : 100.65  
EXP : s2pu1

Elemental Composition Report

Single Mass Analysis

Tolerance = 50.0 PPM / DBE: min = -5.0, max = 80.0  
Element prediction: Off  
Number of isotope peaks used for I-FIT = 3

Monoisotopic Mass, Even Electron Ions  
36 formula(e) evaluated with 1 results within limits (up to 4 best isotopic matches for each mass)  
Elements Used:

C: 0-22 H: 0-28 N: 0-2 O: 0-4  
CRR/QL/14

UT0215\_82 176 (3.253) Cm (175:176-146:148x0.010)

1: TOF MS ES+  
7.36e+003

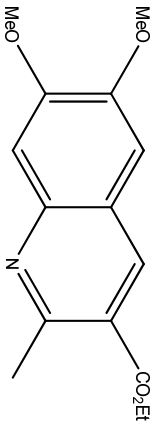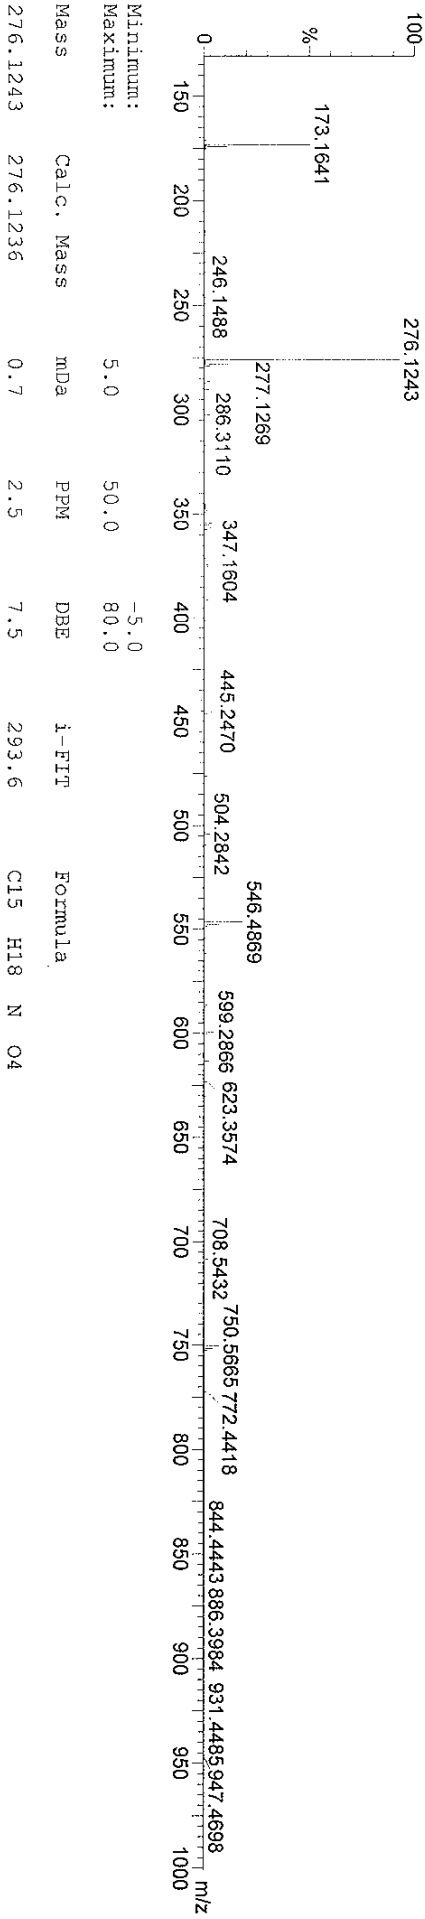

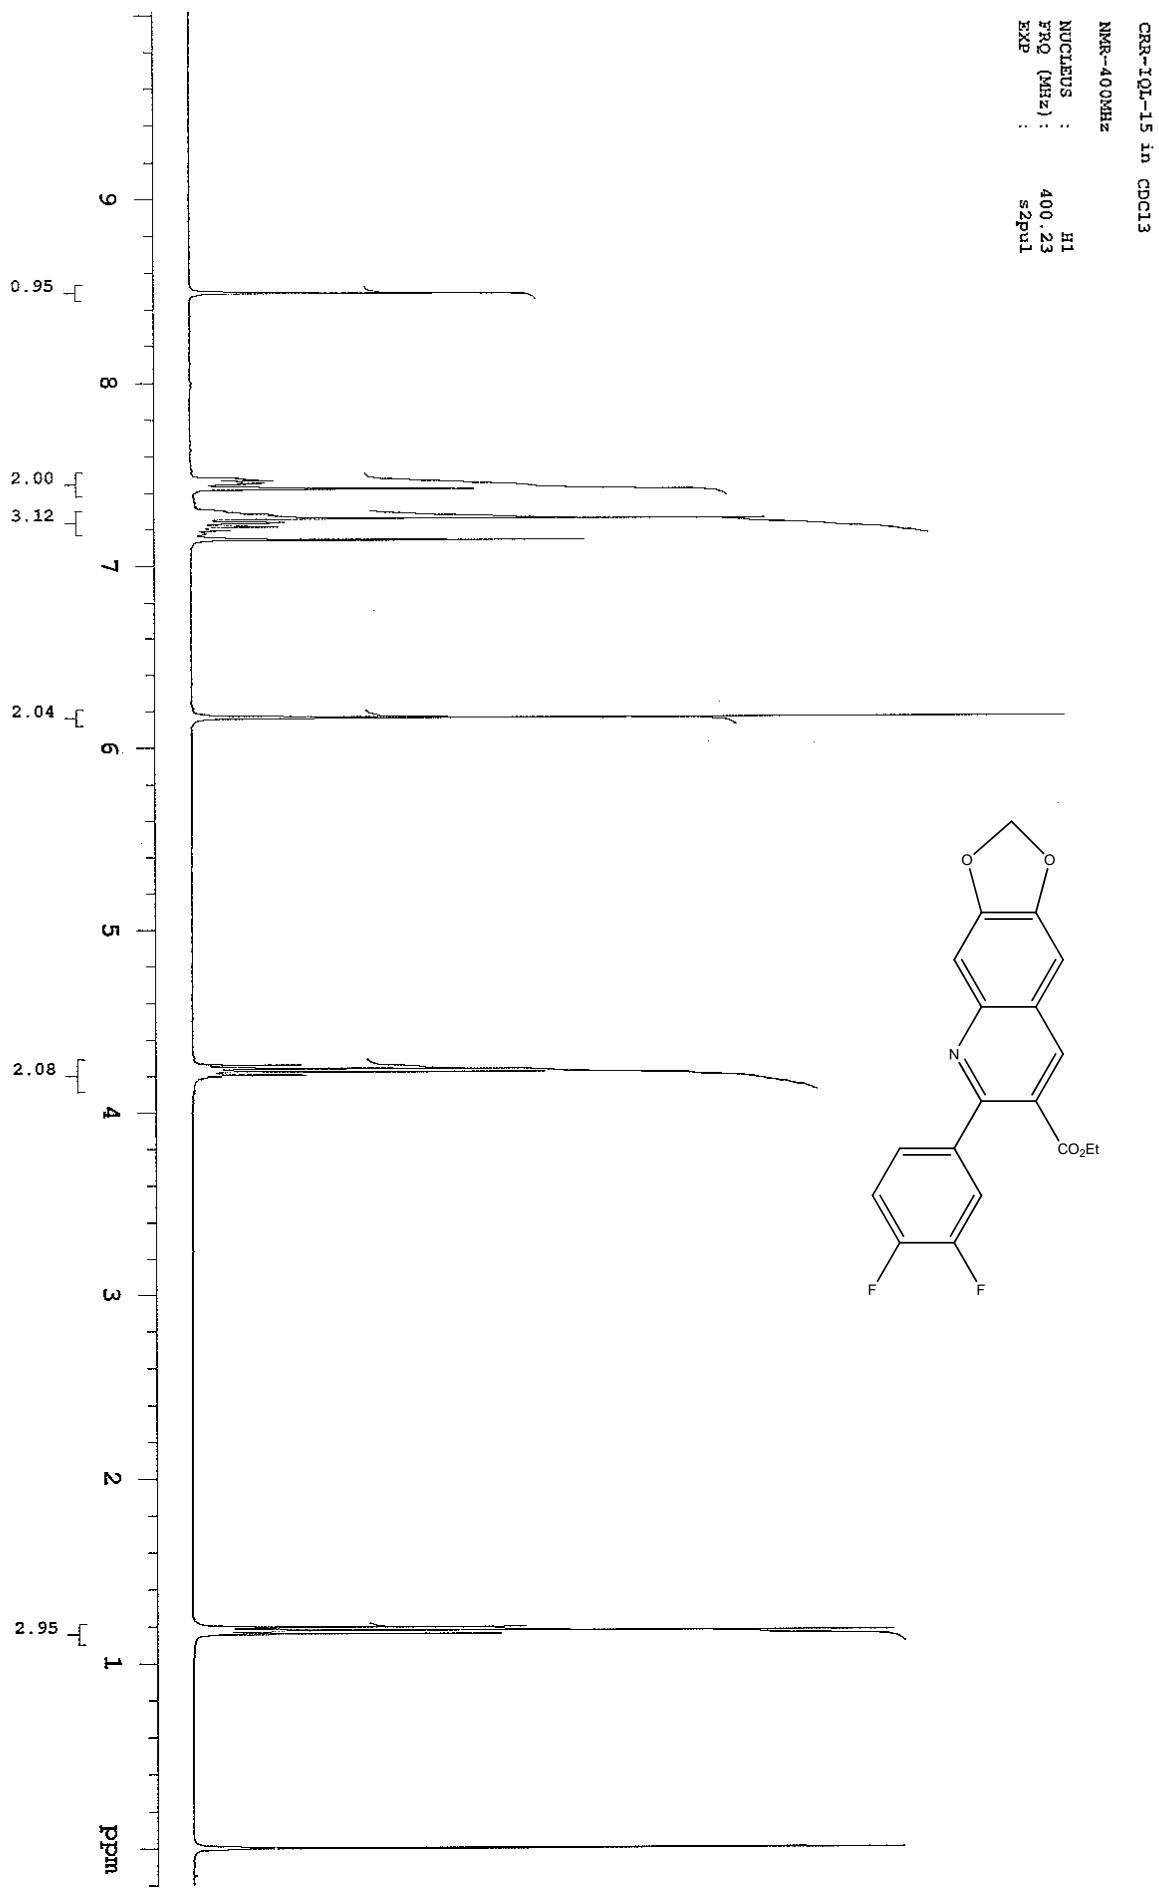

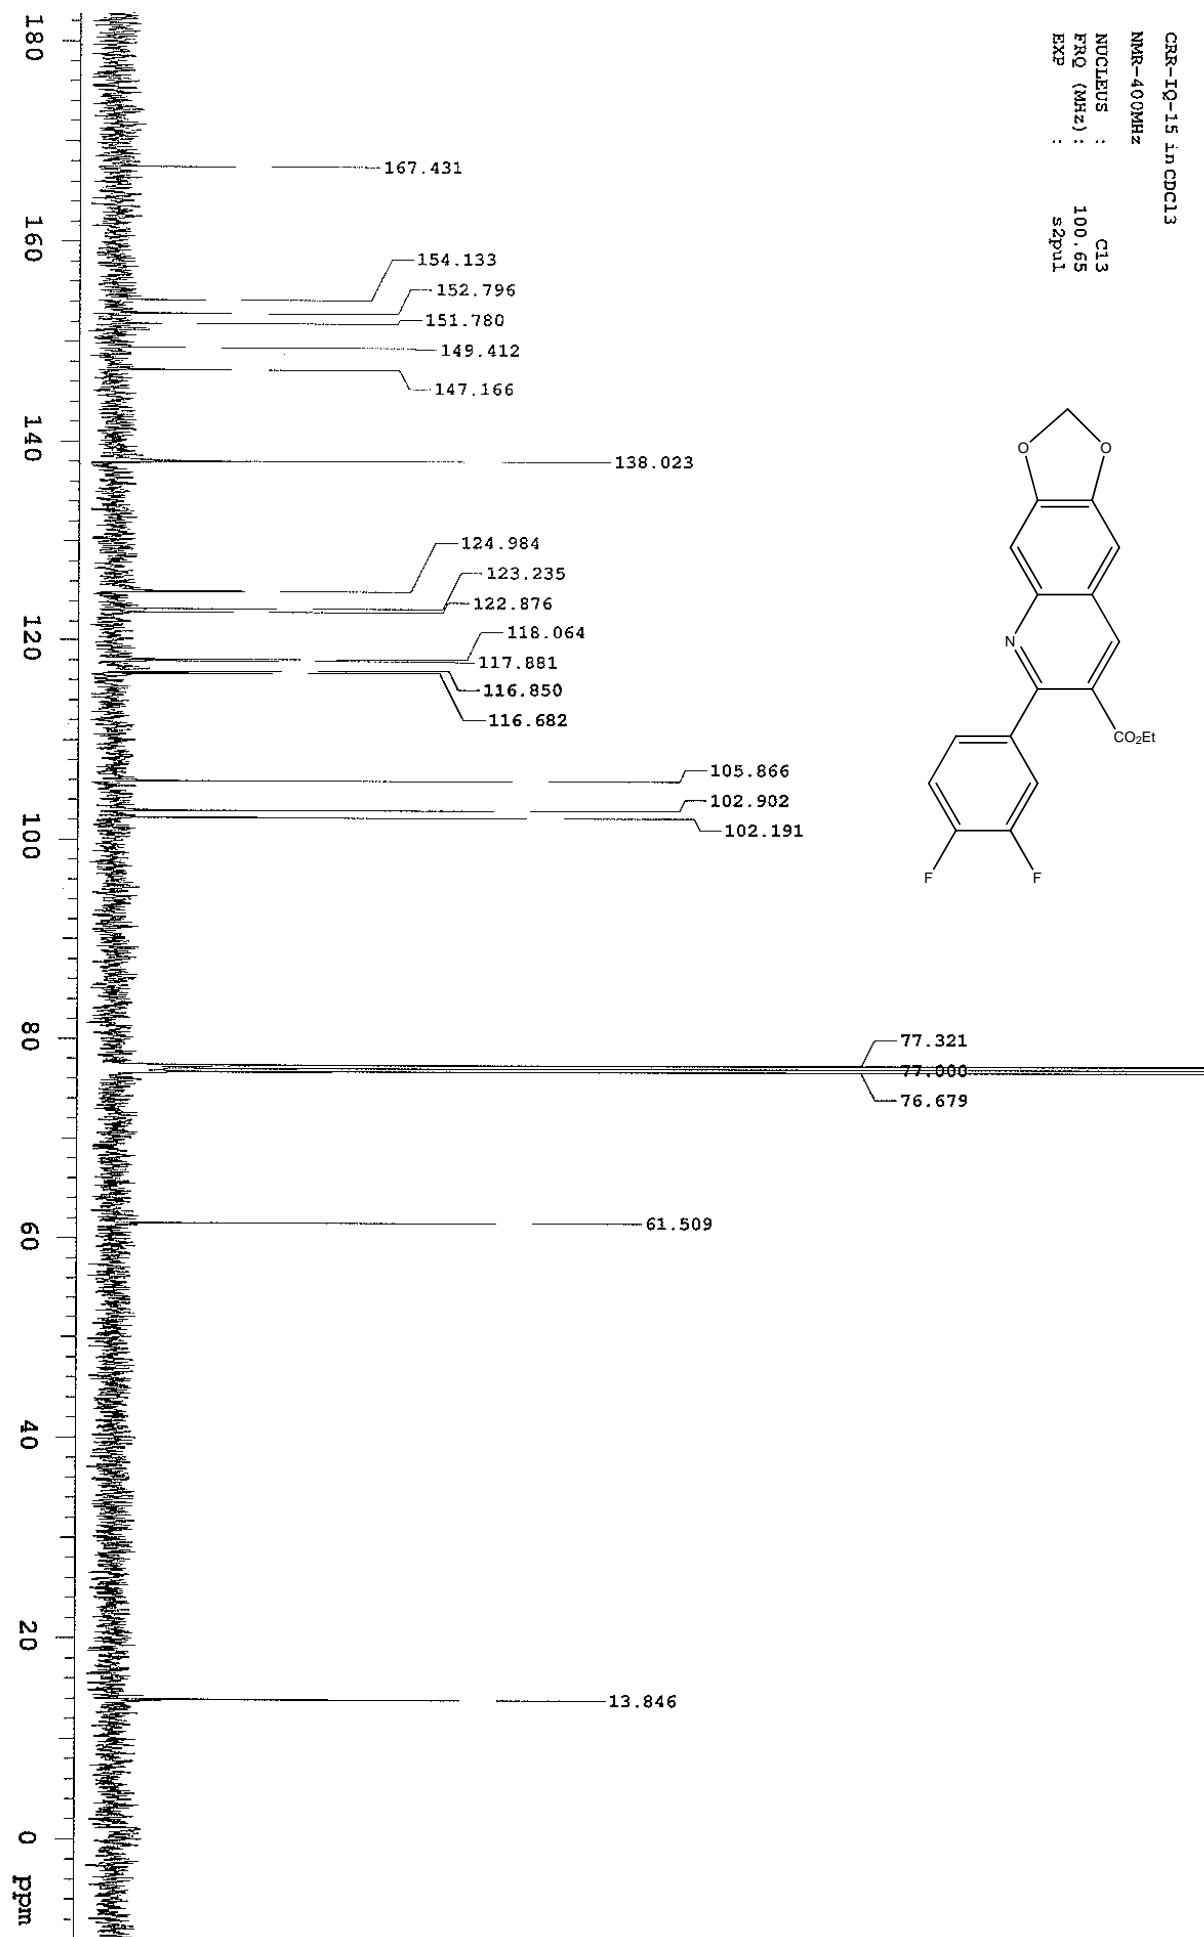

Elemental Composition Report

Single Mass Analysis

Tolerance = 5.0 PPM / DBE: min = 10.0, max = 80.0  
Element prediction: Off  
Number of isotope peaks used for i-FIT = 3

Monoisotopic Mass, Even Electron Ions  
16 formula(e) evaluated with 1 results within limits (up to 4 closest results for each mass)  
Elements Used:  
C: 5-20 H: 10-15 N: 0-1 O: 0-4 F: 0-2  
CRR-IQL/15

UT0215\_127 28 (0.515) Cm (28:29-1:5x0.010)

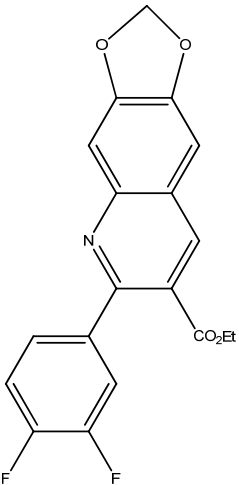

1: TOF MS ES+  
3.36e+004

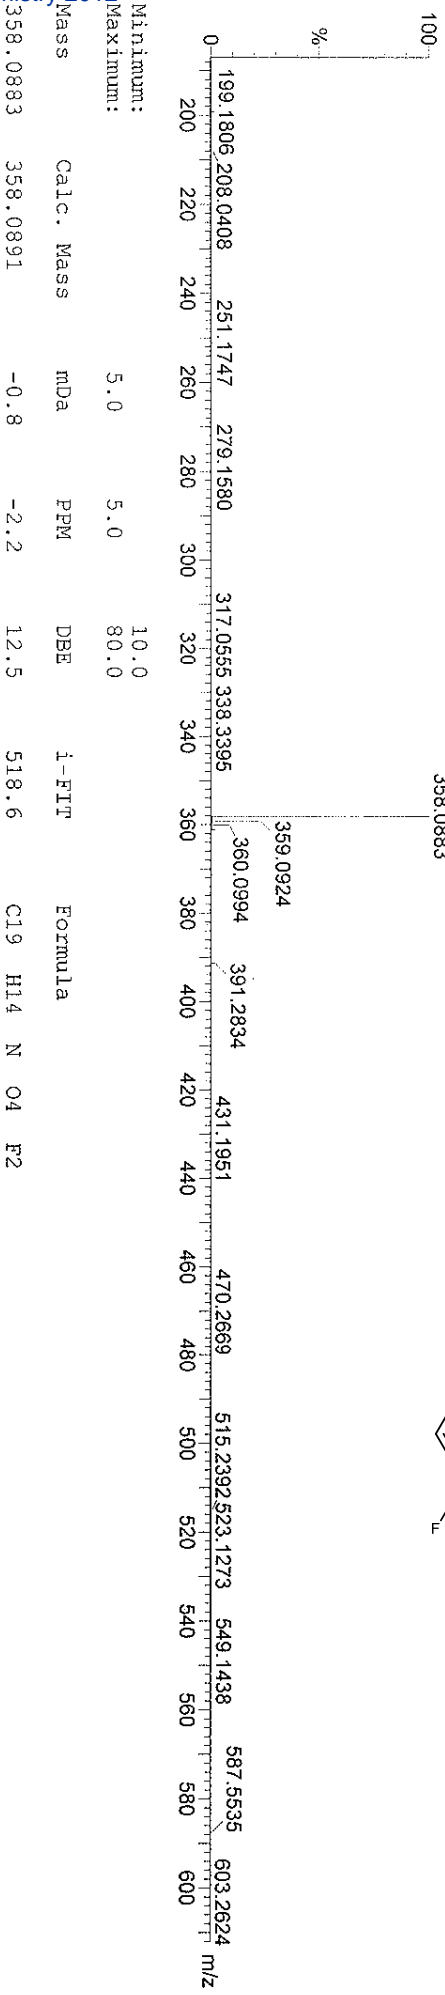

|                 |            |      |      |      |       |
|-----------------|------------|------|------|------|-------|
| Minimum:        |            |      |      |      |       |
| Maximum:        |            |      |      |      |       |
| Mass            | Calc. Mass | mDa  | PPM  | DBE  | i-FIT |
| 358.0883        | 358.0891   | -0.8 | -2.2 | 12.5 | 518.6 |
| Formula         |            |      |      |      |       |
| C19 H14 N O4 F2 |            |      |      |      |       |

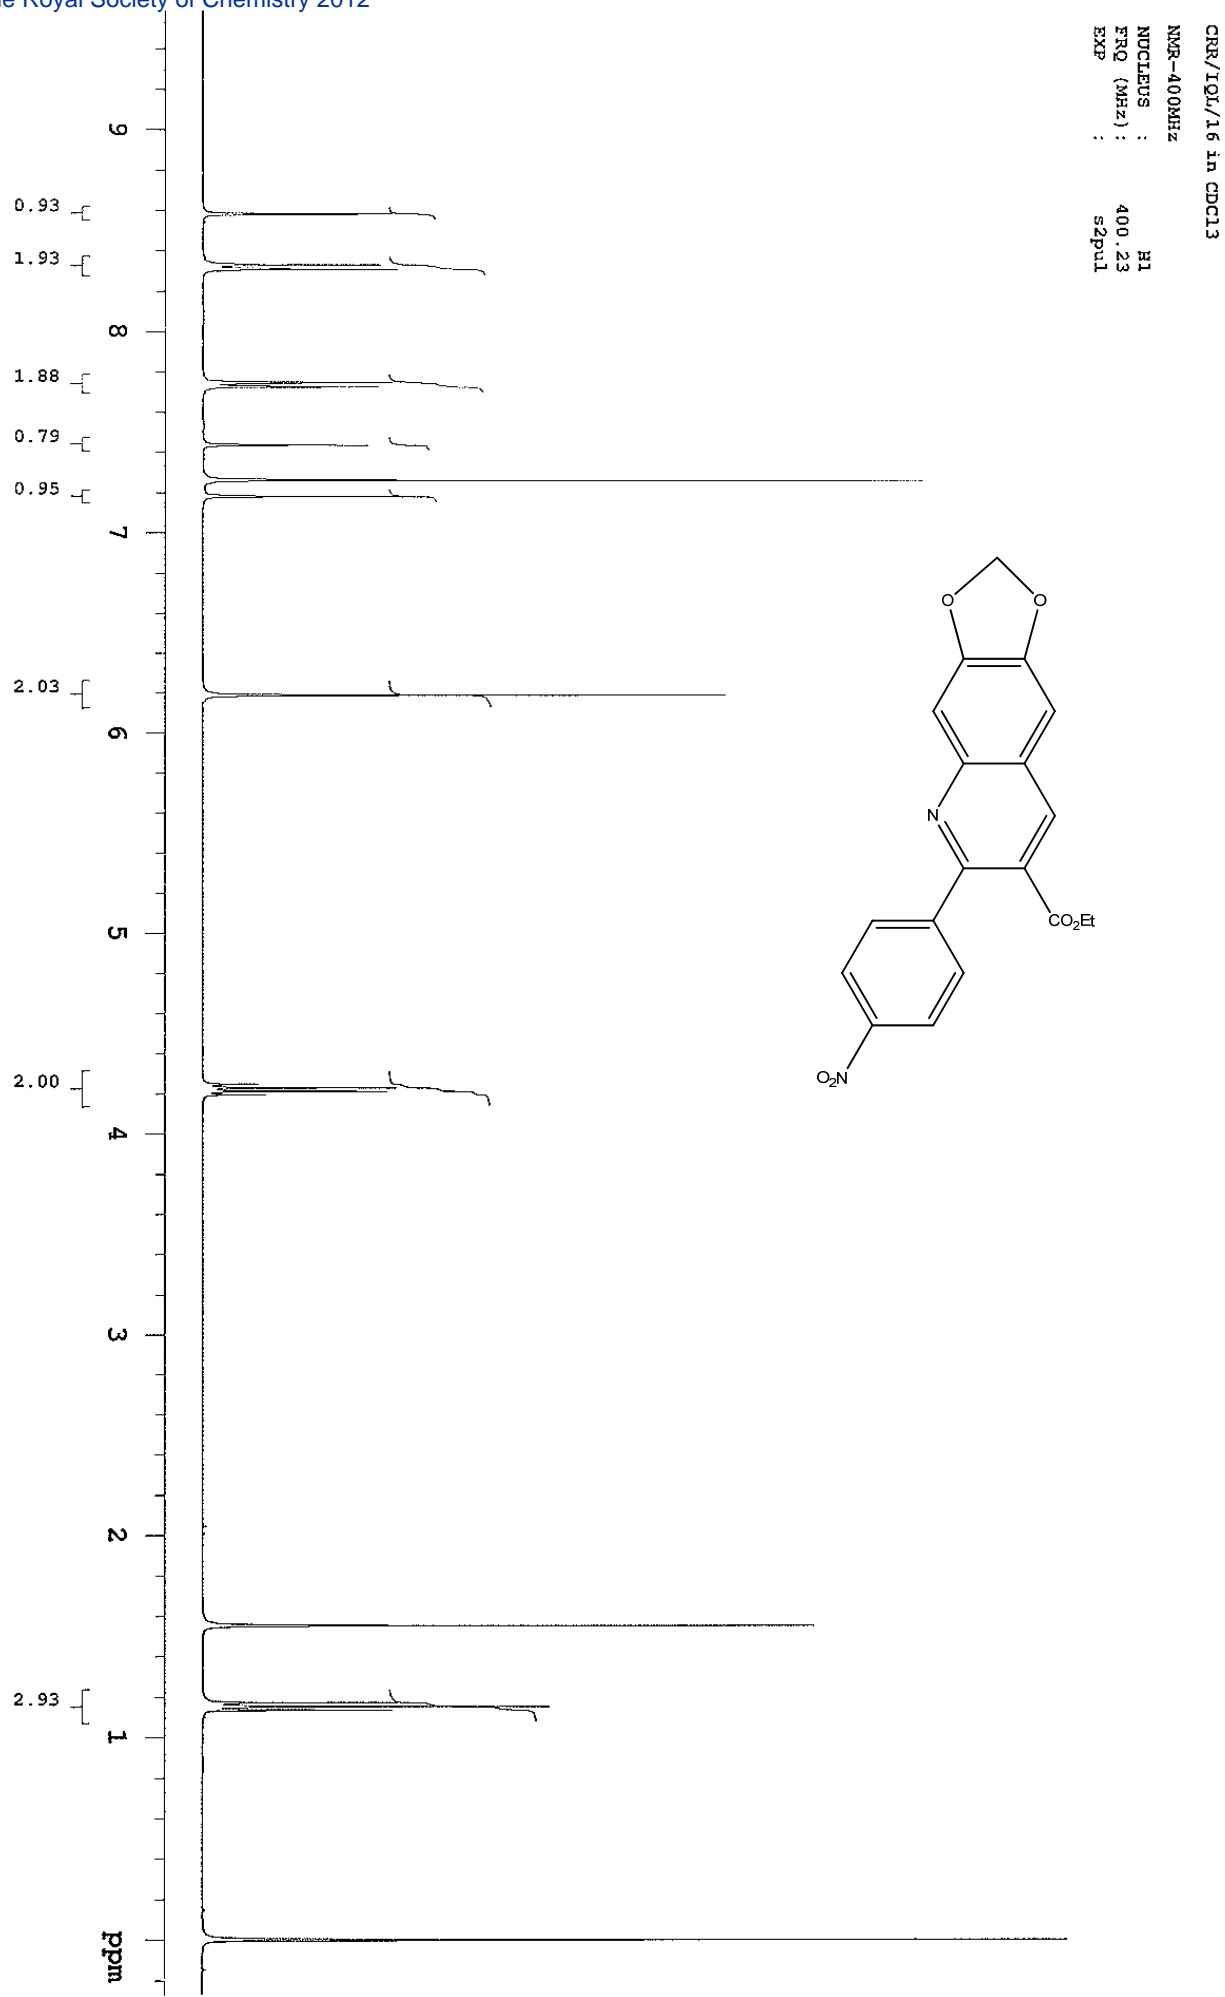

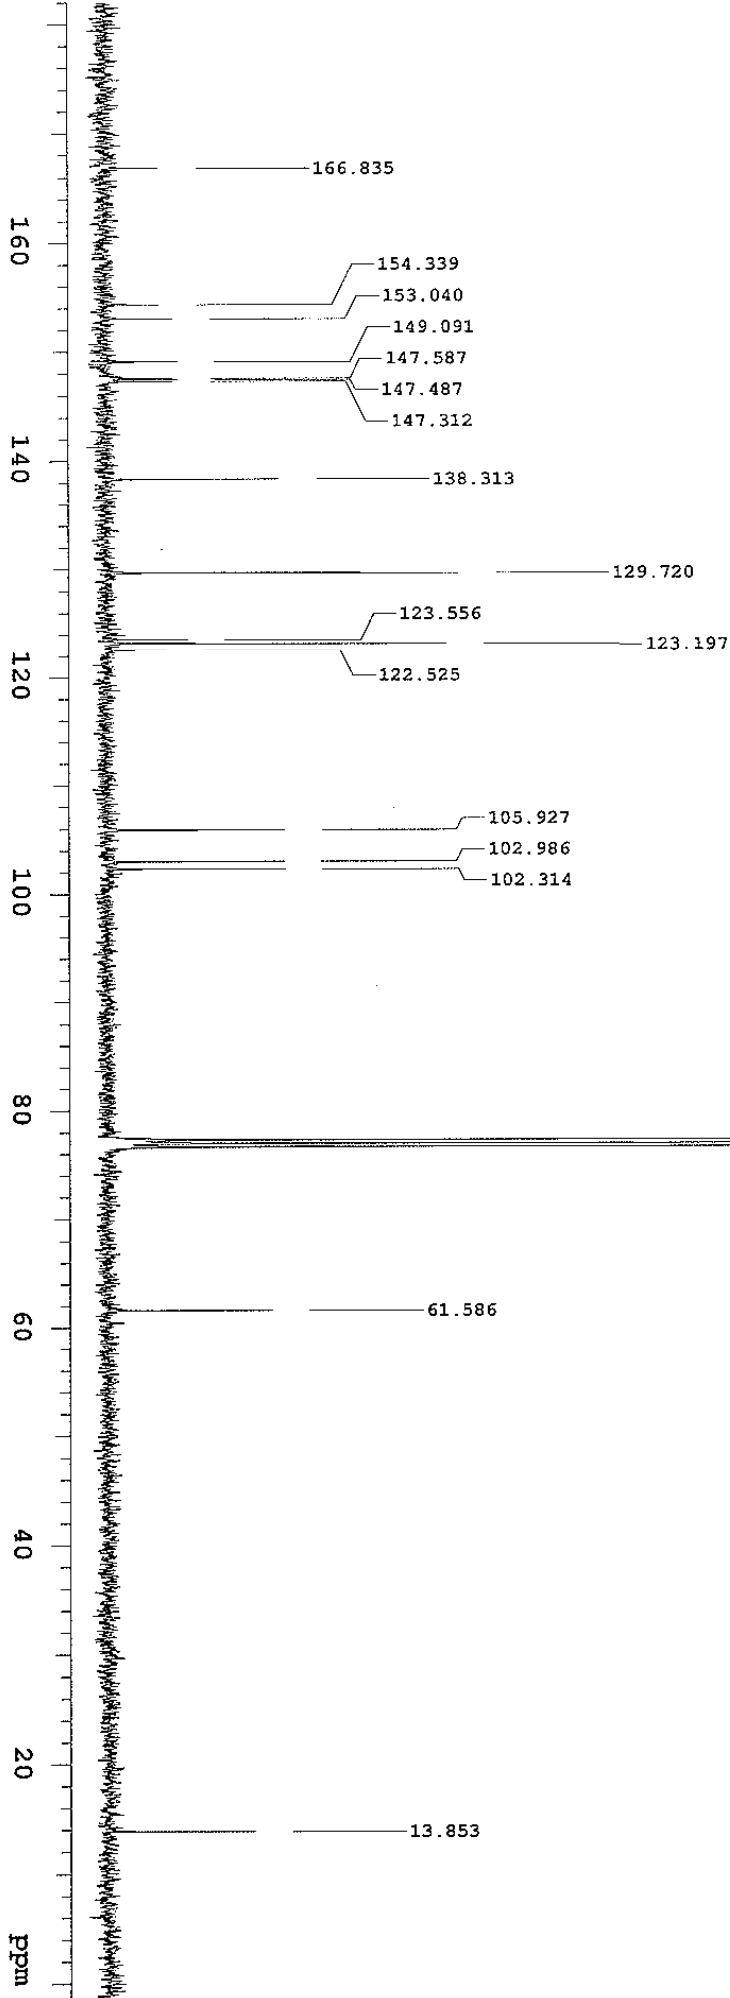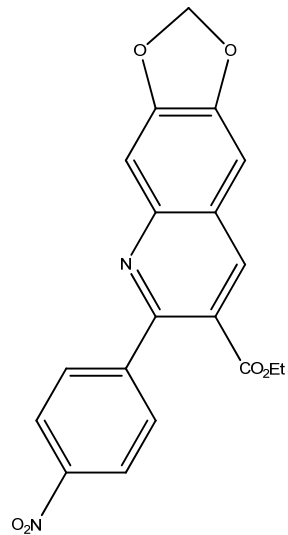

CRR-10L-16 in CDCl3  
NMR-400MHz  
NUCLEUS : C13  
FREQ (MHz) : 100.65  
EXP : s2pu1

Elemental Composition Report

Single Mass Analysis

Tolerance = 5.0 PPM / DBE: min = -1.0, max = 80.0  
Element prediction: Off  
Number of isotope peaks used for i-FIT = 3

Monoisotopic Mass, Even Electron Ions  
16 formula(e) evaluated with 1 results within limits (up to 4 best isotopic matches for each mass)

Elements Used:  
C: 0-20 H: 0-20 N: 0-2 O: 0-6  
CRR/QL/16

UT0215\_139 11 (0.204) Cm (9:13)

1: TOF MS ES+  
7.86e+003

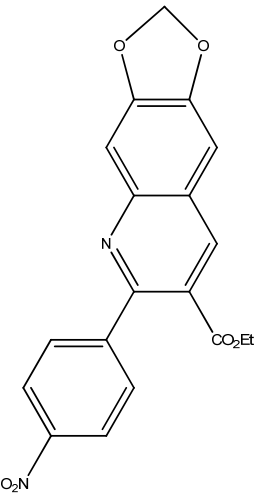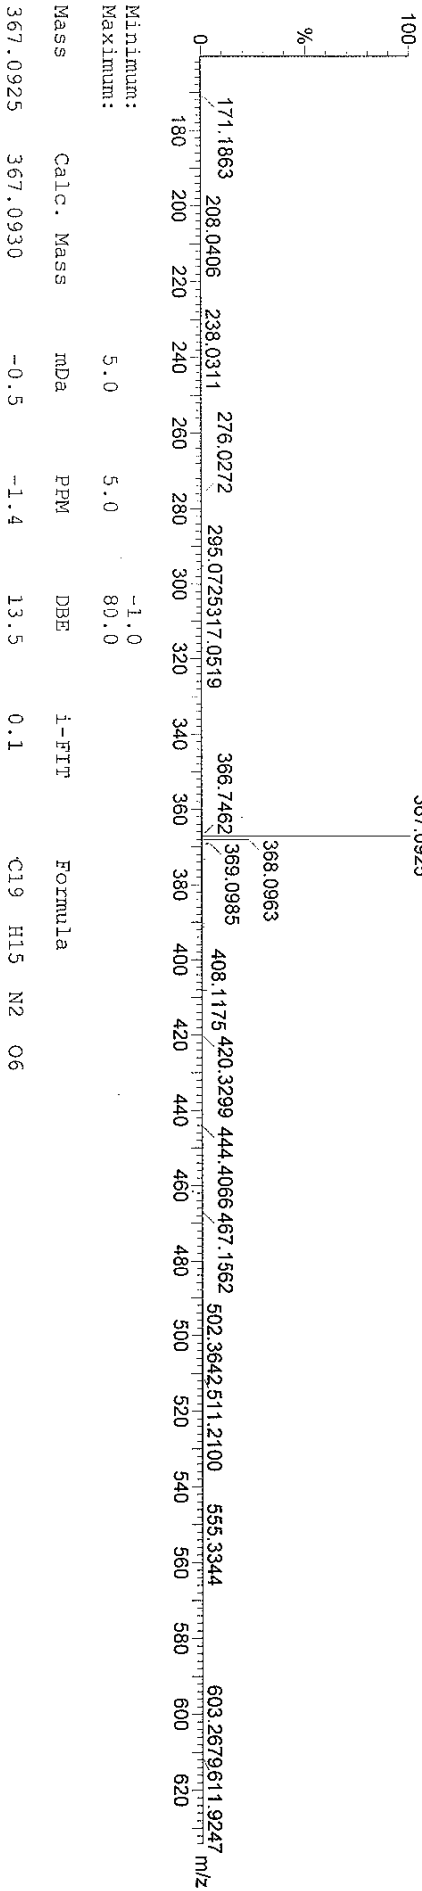

Minimum: 5.0  
Maximum: 5.0  
-1.0  
80.0

| Mass     | Calc. Mass | mDa  | PPM  | DBE  | i-FIT | Formula       |
|----------|------------|------|------|------|-------|---------------|
| 367.0925 | 367.0930   | -0.5 | -1.4 | 13.5 | 0.1   | C19 H15 N2 O6 |

CRR-DHP-13 in CDCl3  
NMR-400MHz

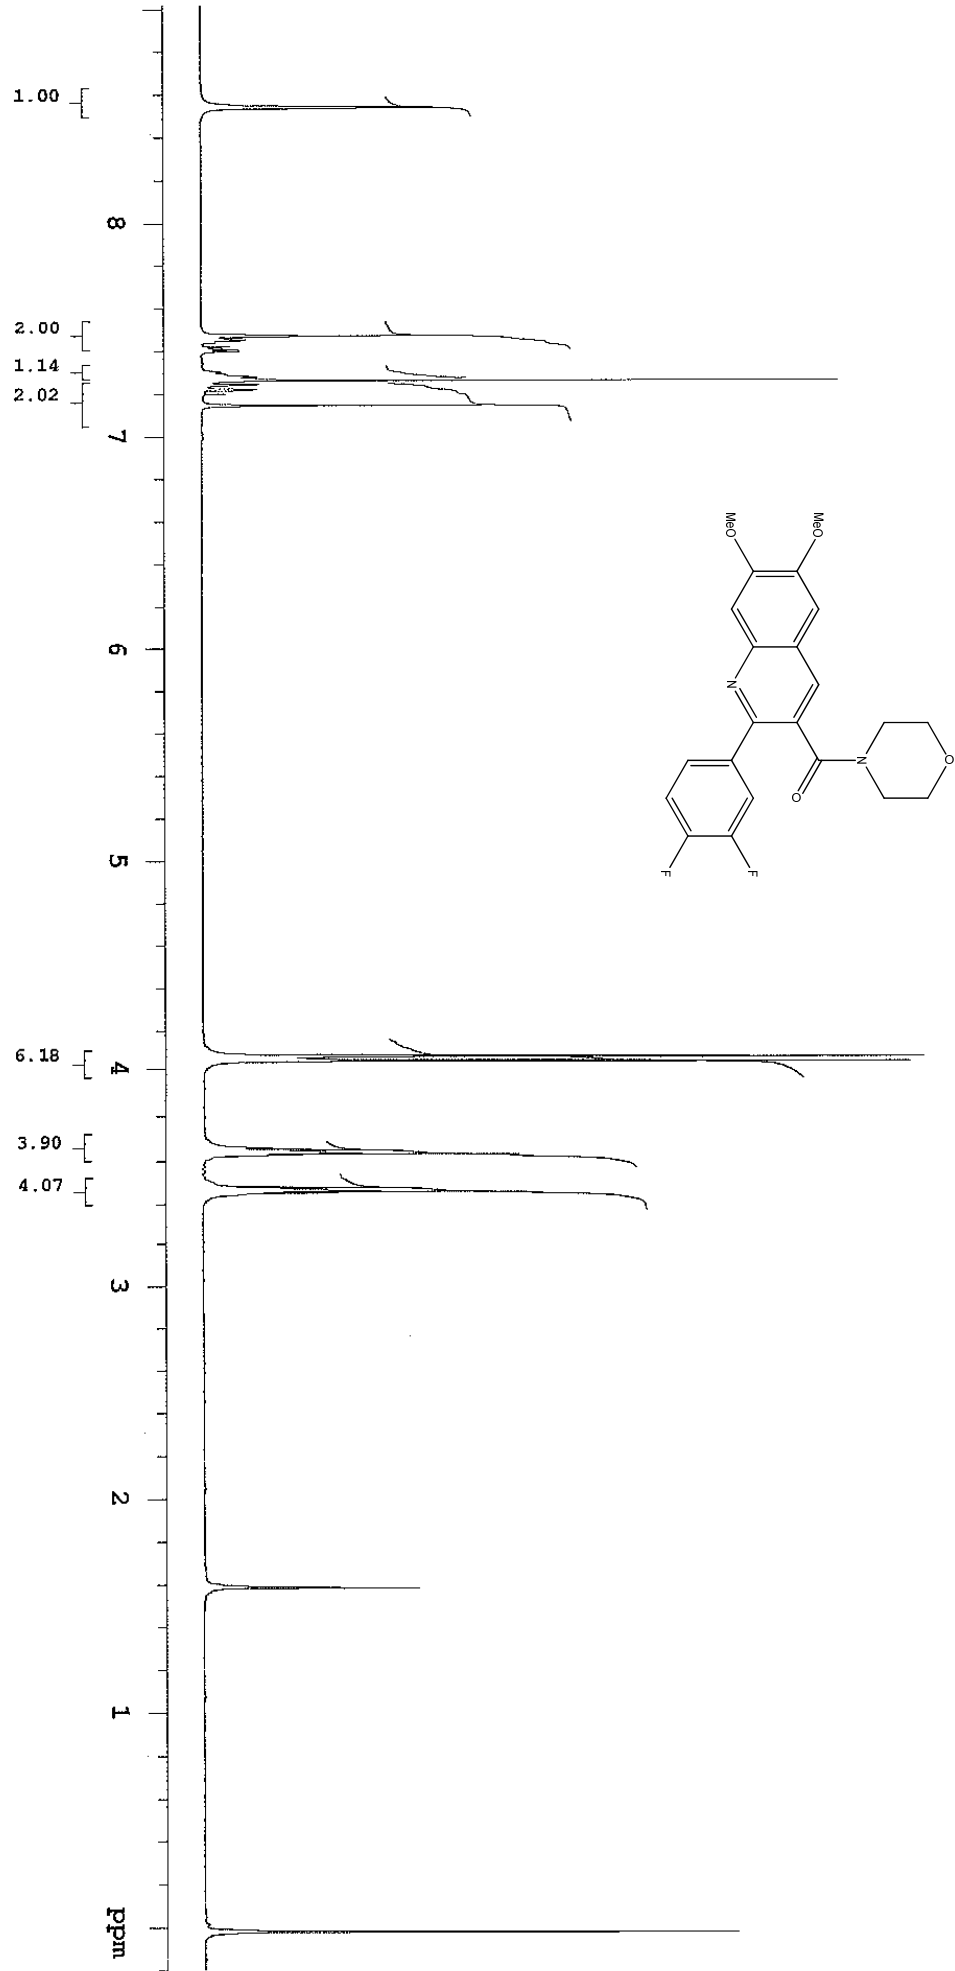

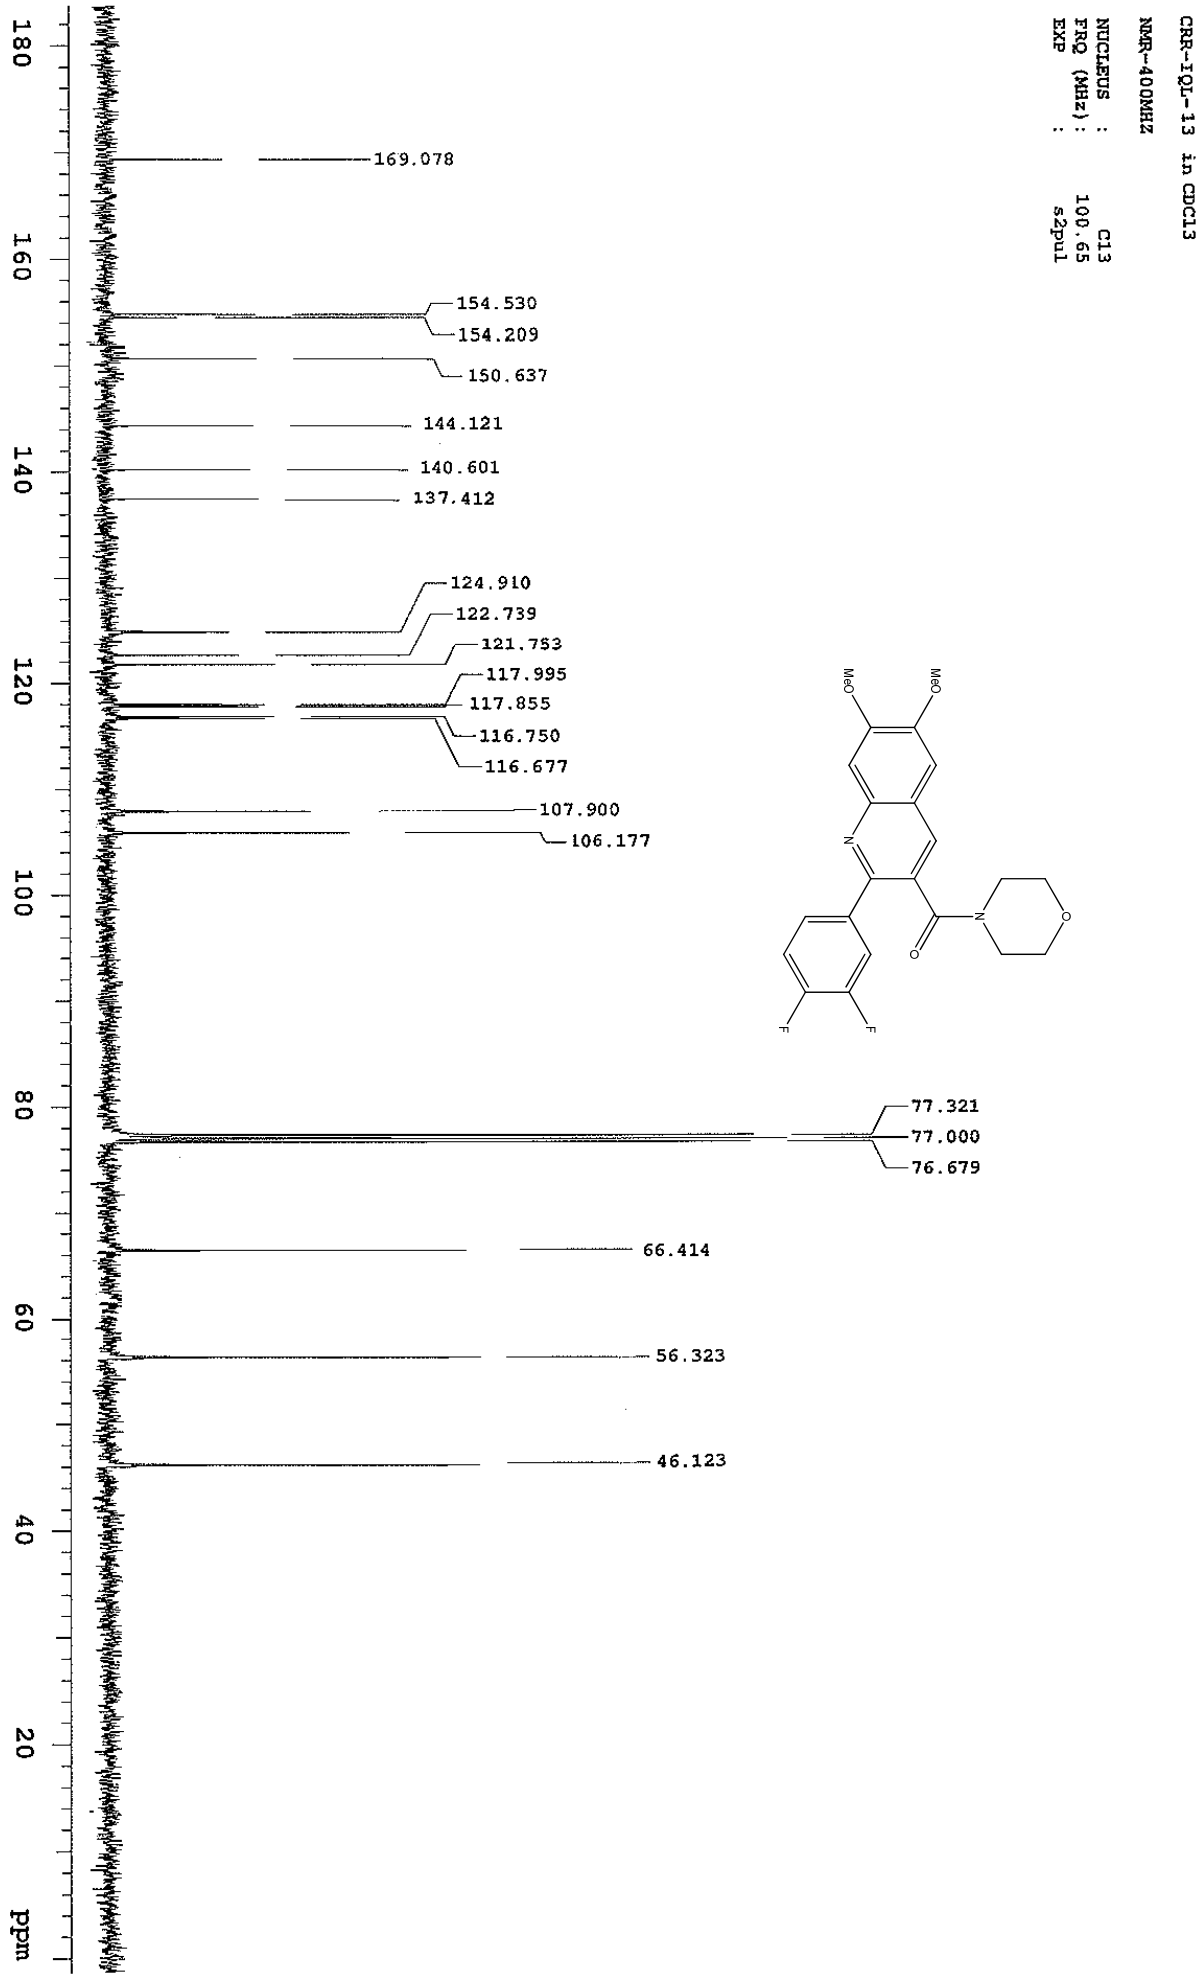

Elemental Composition Report

Single Mass Analysis

Tolerance = 5.0 PPM / DBE: min = 0.0, max = 80.0

Element prediction: Off

Number of isotope peaks used for i-FIT = 4

Monoisotopic Mass, Even Electron Ions

137 formula(e) evaluated with 2 results within limits (up to 4 best isotopic matches for each mass)

Elements Used:

C: 0-30 H: 0-35 N: 0-2 O: 0-4 F: 0-2

CRR-IQL/13

UT1112\_54 27 (0.615) Cm (27.30-73.80x0.010)

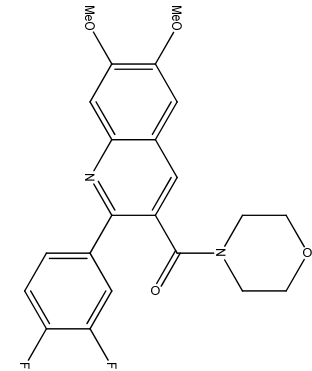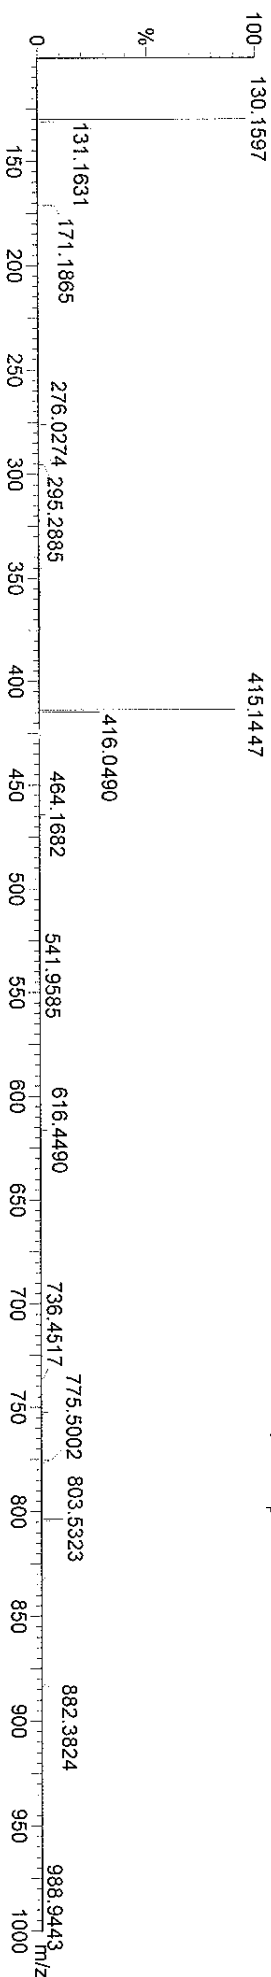

1: TOF MS ES+  
2: 49e+004

|          |            |     |     |      |                  |
|----------|------------|-----|-----|------|------------------|
| Minimum: |            |     |     |      |                  |
| Maximum: |            |     |     |      |                  |
| Mass     | Calc. Mass | mDa | PPM | DBE  | i-FIT            |
| 415.1447 | 415.1443   | 1.0 | 2.6 | 11.5 | 3.9              |
|          |            |     |     |      | Formula          |
|          |            |     |     |      | C22 H21 N2 O4 F2 |
